# Supplementary material for: Improvements to the Shaw-Type Absolute Palaeointensity Method
Source: Frontiers journal article supplement (doi:10.3389/feart.2021.701863), 2021-07-29
Supplement: Table_1.XLSX [file Table_1.XLSX]

## Sheet: Supplementary Table 1
	Formation	Age	Specimen
	Bangemall Sill	1070Ma	BM6.1CA
			BM6.3D
			BM6.4BB
			BM6.5BD
			BM7.1AA
			BM7.1BC
			BM7.4BA
	Mundine Wells Dyke	755Ma	MD2.4C
			MD2.10A
			MD2.11C
			MD3.1C
			MD3.3E
			MD3.4A
			MD4.5C
			MD4.6C
			MD6.1A
			MD6.2A
			MD6.3C
			MD6.5C
	Northampton Dyke	755Ma	NH5.2CB
			NH5.2ED
			NH5.3AD
			NH5.3CB
