# Supplementary material for: Improvements to the Shaw-Type Absolute Palaeointensity Method
Source: Frontiers journal article supplement (doi:10.3389/feart.2021.701863), 2021-07-29
Supplement: Table_2.XLSX [file Table_2.XLSX]

## Sheet: Sheet1
Sample	File	Alpha_t	DANG_t	MAD a_t	MAD f_t	sA2	sT	beta_t	kA2	kT'	fRESID	kT	rT	kT-kT'
B1BM1.1C	BANG1	0.42	0.4	0.14	0.49	0.657873	0.857	0.004	0.03	0.148	0.036	0.114	0.998	-0.034
B1BM1.7D	BANG1	0.58	0.6	0.28	0.64	0.716448	0.936	0.006	0.059	0.283	0.058	0.224	0.993	-0.059
B1BM5.3E	BANG1	0.87	0.9	0.19	0.51	0.487567	0.814	0.006	0.088	0.073	0.053	0.19	0.995	0.117
B1BM6.1AB	BANG1	0.74	0.8	0.35	0.72	0.659187	1.129	0.009	0.146	0.473	0.087	0.318	0.985	-0.155
B1BM6.4AD	BANG1	0.4	0.5	0.29	0.78	0.00508513	92.244	0.076	0.746	0.343	0.64	1.349	0.268	1.006
B1BM6.4BC	BANG1	0.81	0.9	0.35	0.73	0.485069	0.893	0.01	0.008	0.213	0.049	0.213	0.993	0
B1BM7.3BB	BANG1	0.25	0.7	0.52	0.51	1.00773	0.957	0.002	0.082	0.056	0.002	0.033	1	-0.023
B1BM7.4AB	BANG1	0.48	1	0.59	0.37	0.965962	0.977	0.002	0.061	0.065	0.003	0.006	1	-0.059
B1BM7.5B	BANG1	0.58	1.6	0.86	0.47	0.988402	0.974	0.002	0.057	0.079	0.001	0.018	1	-0.061
B1BM8.12E	BANG1	1.56	1.7	0.8	2.76	0.889808	0.802	0.023	0.039	0.368	0.031	0.321	0.983	-0.047
B1BM8.3C	BANG1	0.19	0.6	0.56	0.6	0.978949	0.981	0.002	0.065	0.04	0.001	0.026	1	-0.014
B1BM8.4E	BANG1	0.1	0.3	0.3	0.32	0.973638	0.987	0.002	0.086	0.061	0.001	0.025	1	-0.036
B1BM8.6D	BANG1	0.16	0.4	0.31	0.28	0.973802	1.016	0.005	0.12	0.032	0.007	0.081	0.999	0.049
B1BM8.8D	BANG1	0.12	0.3	0.32	0.35	0.966187	1.034	0.003	0.117	0.089	0.002	0.026	1	-0.063
BABM6.1BA	BANG3	0.35	179.5	0.34	0.47	0.372363	0.779	0.025	0.041	0.345	0.047	0.298	0.989	-0.047
BABM6.4BE	BANG3	0.17	179.8	0.56	1	0.225628	0.945	0.029	0.002	0.348	0.064	0.344	0.984	-0.004
BABM6.5AA	BANG3	0.91	178.7	0.78	0.83	0.358609	1.106	0.009	0.231	0.35	0.009	0.095	0.999	-0.255
BABM6.5BB	BANG3	0.19	179.7	0.35	0.54	0.32677	1.082	0.013	0.251	0.431	0.03	0.155	0.997	-0.276
BABM7.1AC	BANG3	0.05	179.9	0.2	0.27	0.68001	1.112	0.003	0.337	0.349	0.003	0.014	1	-0.335
BABM7.1BB	BANG3	0.36	179.4	0.4	0.4	0.515606	1.292	0.006	0.311	0.372	0.013	0.031	0.999	-0.341
BABM8.1A	BANG3	0.24	179.3	0.62	0.64	0.816812	1.006	0.002	0.296	0.292	0	0.015	1	-0.277
BABM8.4F	BANG3	0.06	179.8	0.54	0.66	0.80532	1.067	0.003	0.352	0.354	0.004	0.008	1	-0.346
BABM8.7E	BANG3	0.05	179.9	0.55	0.69	0.82437	1.058	0.003	0.373	0.396	0.002	0.008	1	-0.388
BZBM6.1AC	BANG4	0.67	179.1	0.73	1.27	0.263003	0.678	0.014	0.089	0.143	0.045	0.249	0.992	0.106
BZBM6.1AE	BANG4	0.91	178.8	0.69	0.89	0.266949	0.71	0.019	0.072	0.238	0.033	0.326	0.985	0.088
BZBM6.1BB	BANG4	0.52	179.3	0.62	1.02	0.309707	0.787	0.02	0.02	0.361	0.047	0.339	0.985	-0.022
BZBM6.1BC	BANG4	1.05	178.6	0.81	1.2	0.235925	0.709	0.015	0.069	0.173	0.045	0.266	0.991	0.093
BZBM6.3B	BANG4	1.09	178.5	0.82	0.87	0.286722	1.083	0.014	0.163	0.401	0.019	0.222	0.993	-0.179
BZBM6.4AE	BANG4	0.45	179.4	0.89	1.71	0.206384	0.802	0.012	0.064	0.116	0.025	0.207	0.994	0.091
BZBM6.4BG	BANG4	0.49	179.2	0.82	1.21	0.355777	1.072	0.013	0.288	0.519	0.021	0.204	0.994	-0.315
BZBM6.5AB	BANG4	1.9	177.4	1.44	1.53	0.246906	0.769	0.012	0.064	0.124	0.044	0.209	0.994	0.085
BZBM6.5AD	BANG4	1.03	178.2	1.1	1.01	0.382137	1.032	0.01	0.312	0.51	0.023	0.15	0.996	-0.36
BZBM6.5BA	BANG4	1.26	178.2	1.23	1.57	0.299117	0.942	0.015	0.114	0.38	0.041	0.252	0.991	-0.128
BZBM8.1C	BANG4	0.51	178.3	0.99	0.7	0.912936	1.066	0.004	0.257	0.289	0.002	0.029	1	-0.26
BZBM8.1E	BANG4	0.33	178.8	0.9	0.86	0.918696	1.094	0.005	0.252	0.272	0.003	0.021	1	-0.251
BZBM8.2A	BANG4	1.1	178.4	0.79	0.55	0.284721	0.719	0.011	0.148	0.05	0.023	0.133	0.997	0.083
BZBM8.2C	BANG4	0.5	179.2	0.52	0.56	0.216374	0.827	0.017	0.017	0.159	0.026	0.199	0.995	0.04
BZBM8.2E	BANG4	0.37	179.4	0.39	0.43	0.217493	0.856	0.012	0.044	0.168	0.027	0.138	0.997	-0.03
BZBM8.4A	BANG4	0.47	178.8	0.72	0.51	0.88796	1.037	0.009	0.237	0.364	0.013	0.124	0.998	-0.24
BZBM8.5C	BANG4	0.28	179.2	0.44	0.3	0.837777	1.043	0.004	0.347	0.408	0.004	0.024	1	-0.384
BZBM8.6B	BANG4	0.33	179.2	0.53	0.45	0.905381	1.064	0.006	0.298	0.373	0.013	0.059	0.999	-0.314
MP1C4	DTBB40	1.64	177.5	1.62	1.98	1.02625	1.013	0.006	0.012	0.011	0.002	0.001	1	-0.01
MP1F3	DTBB40	0.98	178.3	1.26	1.43	1.01221	1.005	0.007	0.036	0.054	0.003	0.01	0.999	-0.044
MP2B4	DTBB40	0.91	178.9	0.54	0.64	1.0255	1.038	0.034	0.111	0.135	0.017	0.243	0.984	0.108
MP2C4	DTBB40	1.04	178.7	0.62	0.76	1.02288	0.996	0.004	0.024	0.007	0.004	0.007	1	0
MP5A3	DTBB40	1.02	178.8	0.48	0.86	0.984552	1.018	0.007	0.042	0.001	0.008	0.04	0.999	0.039
MP5B1	DTBB40	1.06	178.7	0.6	0.72	1.01058	1.003	0.006	0.005	0.015	0.003	0.008	1	-0.007
MP6D2	DTBB40	0.63	178.8	0.68	0.43	1.01437	0.823	0.003	0.032	0	0.002	0.031	1	0.031
MP6D5	DTBB40	0.51	179	0.52	0.31	1.00677	0.942	0.002	0.048	0.048	0.002	0	1	-0.048
MP7A2	DTBB40	1.05	178.6	0.75	0.91	1.02122	0.971	0.005	0.018	0.005	0.005	0.032	1	0.027
MP8A1	DTBB40	0.58	179.3	0.24	0.24	0.988205	1.025	0.003	0.015	0.006	0.007	0.016	1	0.01
MP8A4	DTBB40	0.39	179.5	0.33	0.67	1.01588	1.002	0.002	0.019	0.017	0.005	0.01	1	-0.007
MP9B1	DTBB40	0.35	179.6	0.22	0.34	1.03238	1.016	0.003	0.02	0.015	0.001	0.006	1	-0.009
MP1D5	DTBB60	1.37	177.9	1.42	1.76	1.02321	0.988	0.009	0.015	0.044	0.007	0.061	0.999	0.017
MP1F2	DTBB60	0.35	179.4	0.55	0.69	1.01702	1.03	0.009	0.028	0.061	0.008	0.092	0.999	0.031
MP2A2	DTBB60	0.27	179.5	0.57	0.71	0.999143	1.055	0.013	0.023	0.085	0.007	0.11	0.998	0.025
MP2C3	DTBB60	0.8	179	0.44	0.6	1.04982	0.955	0.008	0.02	0.035	0.008	0.049	0.999	0.014
MP4A2	DTBB60	12.39	167.3	2.11	0.35	0.999666	1.016	0.004	0.009	0.014	0	0.023	1	0.009
MP5B3	DTBB60	0.55	179.4	0.31	0.52	1.0007	1.017	0.013	0.005	0.07	0.006	0.079	0.998	0.009
MP5D1	DTBB60	0.5	179.4	0.33	0.67	0.995815	1.006	0.009	0.009	0.024	0.001	0.013	0.999	-0.011
MP6D3	DTBB60	0.65	178.7	0.74	0.55	1.00756	1.018	0.003	0.023	0.047	0.001	0.025	1	-0.022
MP7A3	DTBB60	2.17	176.6	1.86	1.4	1.00863	1.003	0.005	0.01	0.012	0.001	0.004	1	-0.008
MP7C3	DTBB60	0.25	179.6	0.24	0.31	1.01994	0.974	0.006	0.003	0.01	0.001	0.009	1	-0.001
MP8B2	DTBB60	0.42	179.5	0.2	0.27	1.00119	1.02	0.004	0.013	0.011	0.006	0.026	1	0.015
MP9C2	DTBB60	0.58	179.2	0.33	0.1	0.996961	0.997	0.003	0.007	0.019	0.003	0.015	1	-0.004
10202A	DTGD	1.27	177.6	1.26	0.59	0.961529	1.059	0.003	0.062	0.049	0.001	0.012	1	-0.037
1083A	DTGD	3.79	174.7	2.64	2.26	0.902523	1.036	0.018	0.052	0.108	0.005	0.135	0.994	0.027
14103A	DTGD	0.63	179.1	0.88	1.37	0.928401	0.942	0.014	0.234	0.208	0.023	0.045	0.996	-0.163
1452A	DTGD	1.19	178.1	1.2	1.24	0.93156	0.902	0.016	0.309	0.303	0.006	0.024	0.995	-0.279
1541A	DTGD	3.47	173.8	3.33	1.92	0.919901	0.987	0.011	0.069	0.105	0	0.003	0.998	-0.102
1661A	DTGD	1.25	177.7	2.51	3.28	0.945484	1.022	0.014	0.191	0.202	0.016	0.024	0.996	-0.178
1662A	DTGD	1	178.2	1.56	1.96	0.966454	0.972	0.009	0.227	0.246	0.006	0.017	0.998	-0.229
1943A	DTGD	0.88	178.9	0.72	1.14	0.735098	1.014	0.008	0.088	0.12	0.016	0.025	0.999	-0.095
211A	DTGD	0.4	179	1.05	1.19	0.969431	1.085	0.006	0.052	0.021	0.002	0.031	0.999	0.01
2321A	DTGD	0.79	179	0.56	0.88	0.902114	0.978	0.008	0.154	0.3	0.025	0.092	0.999	-0.208
2582A	DTGD	1.41	177.6	1.31	0.78	0.949225	1.07	0.007	0.135	0.162	0.007	0.009	0.999	-0.153
2592A	DTGD	0.82	178.8	0.71	0.7	0.893053	1.032	0.007	0.05	0.095	0.013	0.042	0.999	-0.053
2652A	DTGD	0.75	178.9	0.67	0.84	0.897532	0.994	0.014	0.06	0.256	0.007	0.162	0.996	-0.094
2662A	DTGD	0.63	179	0.67	0.75	0.928294	0.998	0.005	0.191	0.203	0.002	0.012	1	-0.191
2911B	DTGD	0.24	179.6	0.51	0.74	1.00983	0.979	0.006	0.057	0.027	0.001	0.036	0.999	0.009
29141	DTGD	0.52	179.3	0.59	0.94	0.896203	0.897	0.005	0.111	0.132	0.008	0.006	0.999	-0.126
3384B	DTGD	2.58	176.5	1.72	1.42	0.899396	0.889	0.007	0.025	0.051	0.015	0.057	0.999	0.006
3785A	DTGD	0.43	179.4	0.46	0.59	0.930508	0.937	0.006	0.231	0.275	0.009	0.01	0.999	-0.265
37H44	DTGD	1.55	178	1.09	1.43	0.991997	1.114	0.006	0.035	0.042	0.014	0.072	0.999	0.03
37H53	DTGD	5.57	172.9	3.51	4.28	1.00877	1.057	0.008	0.004	0.098	0.013	0.093	0.999	-0.005
1942A	DTGD_Shaw1	10.02	167.5	5.5	4.98	0.65483	1.085	0.047	0.289	0.112	0.11	0.407	0.969	0.295
2911A	DTGD_Shaw1	7.49	169.2	6.67	8.01	1.00894	0.902	0.033	0.041	0.078	0.092	0.091	0.985	0.013
2944A	DTGD_Shaw1	2.74	173.5	4.74	4.58	0.984014	0.803	0.054	0.363	0.026	0.037	0.315	0.959	0.289
3381A	DTGD_Shaw1	6.3	171.2	4.93	5.54	1.00184	0.989	0.04	0.147	0.038	0.001	0.157	0.978	0.119
1073A	DTGD_SHaw2	0.41	0.7	0.46	0.52	1.00635	1.034	0.005	0.103	0.066	0.003	0.027	1	-0.039
2341	DTGD_SHaw2	0.96	1.2	0.54	0.5	0.739811	0.932	0.004	0.272	0.359	0.004	0.029	1	-0.33
2572	DTGD_SHaw2	0.16	0.2	0.26	0.47	1.01722	1.007	0.005	0.123	0.206	0.011	0.042	1	-0.164
291B9	DTGD_SHaw2	0.82	1.9	1.83	2.11	1.00179	1.006	0.004	0.058	0.044	0.002	0.002	1	-0.042
2961	DTGD_SHaw2	0.15	0.3	0.27	0.39	0.903878	0.927	0.008	0.136	0.217	0.014	0.071	0.999	-0.146
2991	DTGD_SHaw2	0.29	0.5	0.31	0.34	0.957316	0.932	0.004	0.127	0.15	0.006	0.016	1	-0.134
29H43	DTGD_SHaw2	40.53	11.3	1.35	6.09	0.809971	0.617	0.148	0.066	0.127	0.168	0.25	0.716	0.123
782A	DTGD_Shaw2	0.12	0.2	0.32	0.47	1.01044	1.064	0.01	0.07	0.03	0.01	0.096	0.999	0.066
H2A4	DTGD_Shaw2	0.09	0.1	0.21	0.38	1.00984	1.061	0.017	0.209	0.053	0.026	0.18	0.996	0.127
101A	DTSC_Shaw1	1.11	175.1	4.51	4.55	1.09159	1.142	0.046	0.78	0.186	0.079	0.377	0.971	0.191
3122	DTSC_Shaw1	19.04	159.3	7.72	16.93	0.961092	0.345	0.031	0.723	0.468	0.081	0.208	0.986	-0.26
516A	DTSC_Shaw1	28.57	134.8	24.25	17.36	1.00614	1.147	0.013	0.091	0.345	0.008	0.055	0.998	-0.29
622A	DTSC_Shaw1	10.73	167.8	4.1	3.17	0.410568	1.276	0.033	0.088	0.17	0.058	0.219	0.985	0.049
103A	DTSC_Shaw2	0.11	0.3	0.34	0.4	1.17658	0.827	0.008	0.055	0.001	0.001	0.054	0.999	0.053
104A	DTSC_Shaw2	0.25	0.6	0.91	1.09	0.884984	1.082	0.005	0.146	0.125	0.002	0.001	1	-0.124
1112A	DTSC_Shaw2	0.43	0.5	0.31	0.64	0.71928	1.026	0.006	0.025	0.089	0.021	0.061	0.999	-0.028
1404A	DTSC_Shaw2	0.21	0.3	0.51	1.03	0.786199	1.064	0.014	0.056	0.186	0.02	0.131	0.997	-0.055
1413A	DTSC_Shaw2	0.81	0.9	0.35	0.43	0.853171	1.019	0.002	0.066	0.081	0.001	0.015	1	-0.066
1413B	DTSC_Shaw2	1.5	1.7	0.57	0.36	0.87219	1.001	0.003	0.003	0.009	0.007	0.023	1	0.014
1504A	DTSC_Shaw2	0.63	0.9	0.88	1.33	0.908322	0.943	0.018	0.251	0.237	0.008	0.122	0.995	-0.115
1505A	DTSC_Shaw2	0.06	0.1	0.46	0.71	0.905888	1.131	0.009	0.166	0.167	0.006	0.037	0.999	-0.13
308A	DTSC_Shaw2	0.3	0.5	0.59	0.9	1.01174	1.063	0.004	0.159	0.177	0.005	0.04	1	-0.137
309A	DTSC_Shaw2	1.5	1.8	0.91	1.42	0.90545	0.986	0.005	0.049	0.044	0.007	0.029	1	-0.015
312A	DTSC_Shaw2	0.6	0.8	0.4	0.57	0.937828	1.001	0.002	0.055	0.067	0.004	0.018	1	-0.049
515A	DTSC_Shaw2	2.18	3.4	1.8	1.39	1.02974	1.107	0.006	0.195	0.217	0.006	0.062	0.999	-0.155
517B	DTSC_Shaw2	1.29	2.2	1.15	0.58	1.00878	0.981	0.003	0.213	0.326	0	0.017	1	-0.309
625A	DTSC_Shaw2	0.66	0.8	0.3	0.26	0.827271	1.009	0.004	0.036	0.007	0.01	0.038	1	0.031
626A	DTSC_Shaw2	1.2	1.4	0.53	0.49	0.830144	1.016	0.004	0.028	0.076	0.01	0.031	1	-0.045
TS02A	DTSC_Shaw2	4.38	7	4.19	3.99	1.02628	0.981	0.008	0.116	0.216	0.008	0.082	0.999	-0.134
TS04A	DTSC_Shaw2	0.32	0.6	0.96	1.38	0.991282	1.02	0.008	0.043	0.019	0.003	0.066	0.999	0.047
TS04B	DTSC_Shaw2	0.38	0.6	0.58	0.81	0.995793	0.992	0.007	0.061	0.015	0.006	0.053	0.999	0.038
TS05B	DTSC_Shaw2	1.76	177.7	1.32	1.74	0.989345	0.992	0.019	0.041	0.117	0.021	0.157	0.995	0.04
C4602A	DTV1_PTSD1	12.82	164	6.64	4.06	1.00651	0.081	0.079	0.312	0.289	0.18	0.575	0.914	0.286
C4605A	DTV1_PTSD1	8.65	152.3	13.83	6.23	0.940355	0.125	0.067	0.203	0.538	0.034	0.35	0.937	-0.188
C4611A	DTV1_PTSD1	21.21	158.7	1.34	3.86	1.24566	0.373	0.071	0.014	0.603	0.095	0.619	0.932	0.016
C4615A	DTV1_PTSD1	0.4	178.3	1.9	2.03	0.880816	0.642	0.056	0.113	0.157	0.024	0.326	0.956	0.169
C4616A	DTV1_PTSD1	0.82	170.2	4.6	3.89	0.967583	0.955	0.02	0.072	0.101	0.016	0.161	0.995	0.06
C4617A	DTV1_PTSD1	3	171.2	7.59	7.82	0.966214	0.814	0.046	0.009	0.486	0.064	0.474	0.97	-0.012
C4618A	DTV1_PTSD1	0.23	170.4	6.1	5.99	0.939389	0.345	0.08	0.025	0.671	0.033	0.363	0.912	-0.308
C4620A	DTV1_PTSD1	6.29	159.5	10.12	4.3	1.02406	0.166	0.056	0.172	0.56	0.024	0.452	0.956	-0.108
C4621A	DTV1_PTSD1	1.19	176.6	2.19	1.83	0.946568	0.347	0.034	0.124	0.329	0.029	0.218	0.983	-0.111
C4622A	DTV1_PTSD1	30.08	76	12.59	4.21	1.00883	0.95	0.028	0.025	0.138	0.01	0.14	0.989	0.002
C4624A	DTV1_PTSD1	0.21	179.2	1.03	1.12	0.998852	0.854	0.019	0.047	0.208	0.021	0.177	0.995	-0.031
C4625A	DTV1_PTSD1	0.64	177	2.21	2.07	0.867789	0.457	0.052	0.757	1.164	0.086	0.55	0.963	-0.614
C8201A	DTV1_PTSD1	1.13	178.2	1.06	0.95	1.15842	0.472	0.01	0.122	0.208	0.005	0.087	0.999	-0.121
CK306A	DTV1_PTSD1	48.63	53.6	29.56	18.98	4900.33	0.425	0.323	0.166	2.395	0.177	2.322	0.073	-0.073
CK308A	DTV1_PTSD1	6.57	140.8	15.89	5.32	0.965718	0.178	0.028	0.176	0.358	0.036	0.245	0.989	-0.113
CK310A	DTV1_PTSD1	1.69	173.7	3.38	2.26	0.58674	0.443	0.048	1.175	1.404	0.078	0.494	0.968	-0.91
CK311A	DTV1_PTSD1	6.55	55.8	17.12	2.72	0.767722	0.224	0.101	0.657	1.334	0.123	1.031	0.862	-0.303
CK313A	DTV1_PTSD1	1.01	174.9	3.36	2.98	0.670666	0.192	0.054	0.877	1.246	0.053	0.615	0.959	-0.631
CK320A	DTV1_PTSD1	11.2	168.8	0.67	2.34	1.2804	0.977	0.021	0.035	0.083	0	0.115	0.994	0.032
CK321A	DTV1_PTSD1	14.15	165.8	0.7	2.42	1.11879	0.88	0.021	0.016	0.067	0.041	0.081	0.994	0.014
CK328A	DTV1_PTSD1	0.3	179.2	0.85	0.97	0.687246	0.767	0.036	0.781	1.088	0.078	0.338	0.982	-0.75
CK331A	DTV1_PTSD1	0.54	178.9	0.76	0.74	1.34181	0.63	0.019	0.195	0.365	0.032	0.196	0.995	-0.169
BAZ01A	DTV1_PTSD2	0.22	179.7	0.15	0.17	1.20853	0.814	0.016	0.174	0.061	0.032	0.156	0.996	0.095
BAZ02A	DTV1_PTSD2	0.78	179.1	0.37	0.23	1.14889	0.817	0.019	0.278	0.188	0.018	0.194	0.995	0.006
BAZ03A	DTV1_PTSD2	0.76	179.1	0.31	0.43	0.895113	1.022	0.012	0.297	0.277	0.017	0.11	0.998	-0.167
BAZ05A	DTV1_PTSD2	0.43	179.5	0.29	0.37	0.940504	0.961	0.024	0.472	0.313	0.018	0.189	0.992	-0.124
BAZ06A	DTV1_PTSD2	0.47	179.4	0.35	0.39	0.987531	0.954	0.013	0.189	0.157	0.015	0.04	0.998	-0.117
BAZ08A	DTV1_PTSD2	0.34	179.7	0.05	0.55	0.917789	0.652	0.021	0.362	0.255	0.018	0.138	0.994	-0.117
BAZ09A	DTV1_PTSD2	0.41	179.6	0.1	0.37	0.908334	0.677	0.01	0.216	0.403	0.016	0.015	0.999	-0.388
BAZ10A	DTV1_PTSD2	0.69	179.3	0.11	0.52	0.998452	0.758	0.034	0.405	0.227	0.031	0.24	0.984	0.013
BAZ11A	DTV1_PTSD2	0.7	179.3	0.1	0.72	0.967097	0.71	0.029	0.321	0.148	0.03	0.193	0.988	0.045
BAZ12A	DTV1_PTSD2	1.25	178.7	0.24	0.34	0.740428	0.899	0.022	0.138	0.505	0.054	0.222	0.993	-0.283
BM01A	DTV1_PTSD2	0.16	179.7	0.19	0.22	1.10513	0.909	0.003	0.018	0.011	0.003	0.013	1	0.002
BM02A	DTV1_PTSD2	0.19	179.7	0.24	0.31	1.22889	0.826	0.005	0.033	0.01	0.006	0.036	1	0.026
BM04A	DTV1_PTSD2	1.11	178.5	0.72	0.58	1.22036	0.753	0.004	0.071	0.05	0.006	0.018	1	-0.032
BM05A	DTV1_PTSD2	0.61	179.1	0.47	0.37	1.11398	0.879	0.008	0.014	0.081	0.006	0.059	0.999	-0.022
BM06A	DTV1_PTSD2	0.08	179.9	0.25	0.45	1.18852	0.813	0.006	0.036	0.042	0.012	0.011	0.999	-0.031
BR01A	DTV1_PTSD2	0.6	179.3	0.28	0.45	1.00408	0.831	0.017	0.04	0.135	0.01	0.114	0.996	-0.021
BR02A	DTV1_PTSD2	0.49	179.5	0.11	0.42	0.736871	0.859	0.022	0.129	0.409	0.049	0.219	0.993	-0.19
BR03A	DTV1_PTSD2	0.82	179	0.43	0.39	1.30961	0.846	0.009	0.196	0.245	0.002	0.025	0.999	-0.22
BR04A	DTV1_PTSD2	0.55	179.4	0.24	0.36	0.879177	0.798	0.048	0.106	0.583	0.055	0.434	0.968	-0.149
BR05A	DTV1_PTSD2	0.52	179.4	0.28	0.5	1.16834	0.821	0.032	0.096	0.231	0.043	0.284	0.986	0.053
BR06A	DTV1_PTSD2	0.21	179.8	0.21	0.57	0.804982	0.782	0.033	0.162	0.442	0.016	0.16	0.985	-0.282
BR07A	DTV1_PTSD2	0.89	178.9	0.52	0.6	1.3538	0.738	0.01	0.258	0.362	0.016	0.094	0.999	-0.268
BR08A	DTV1_PTSD2	0.45	179.5	0.24	0.71	0.720725	0.905	0.025	0.3	0.599	0.05	0.26	0.991	-0.339
BR09A	DTV1_PTSD2	0.01	180	0.17	0.47	1.28142	0.778	0.023	0.489	0.36	0.015	0.209	0.993	-0.151
BR11A	DTV1_PTSD2	0.52	179.4	0.33	0.61	0.78436	1.026	0.016	0.432	0.405	0.001	0.104	0.996	-0.301
BR12A	DTV1_PTSD2	0.72	179.1	0.4	0.51	1.29548	0.953	0.02	0.766	0.75	0.004	0.106	0.994	-0.644
BR13A	DTV1_PTSD2	0.36	179.5	0.31	0.47	0.85195	0.929	0.011	0.487	0.507	0.016	0.001	0.998	-0.506
BZ01A	DTV1_PTSD2	1.58	178.3	0.38	0.68	0.835016	0.807	0.008	0.279	0.423	0.016	0.054	0.999	-0.369
BZ02A	DTV1_PTSD2	0.49	179.5	0.16	0.56	0.612443	0.926	0.031	0.815	0.959	0.093	0.254	0.986	-0.705
BZ04A	DTV1_PTSD2	0.77	179.2	0.21	0.27	0.689852	1.013	0.01	0.388	0.517	0.007	0.053	0.998	-0.464
BZ05A	DTV1_PTSD2	1.3	178.7	0.15	0.69	0.800014	0.593	0.027	0.15	0.16	0.057	0.225	0.99	0.065
BZ06A	DTV1_PTSD2	0.39	179.6	0.05	0.52	0.727931	0.605	0.027	0.198	0.078	0.079	0.201	0.99	0.123
BZ07A	DTV1_PTSD2	0.93	179	0.19	0.47	0.794494	0.761	0.026	0.148	0.479	0.069	0.273	0.99	-0.206
BZ08A	DTV1_PTSD2	1.44	178.5	0.16	0.83	0.749427	0.563	0.03	0.038	0.339	0.088	0.246	0.988	-0.093
BZ09A	DTV1_PTSD2	0.72	179.3	0.09	0.66	0.676104	0.593	0.04	0.042	0.491	0.116	0.355	0.978	-0.136
BZ10A	DTV1_PTSD2	1.53	178.5	0.18	0.92	0.627679	0.737	0.017	0.046	0.31	0.037	0.123	0.996	-0.187
BZ11A	DTV1_PTSD2	0.35	179.6	0.07	0.63	0.616902	0.737	0.028	0.047	0.434	0.071	0.262	0.989	-0.172
BZ12A	DTV1_PTSD2	1	179	0.25	0.67	0.683644	0.963	0.013	0.2	0.383	0.011	0.073	0.998	-0.31
BZ13A	DTV1_PTSD2	0.05	179.9	0.09	0.35	0.738017	0.926	0.016	0.329	0.509	0.029	0.163	0.997	-0.346
BZ14A	DTV1_PTSD2	1.19	178.8	0.22	0.31	0.688348	0.899	0.016	0.173	0.442	0.027	0.133	0.996	-0.309
BZ15A	DTV1_PTSD2	0.47	179.5	0.16	0.23	0.816909	0.87	0.01	0.44	0.469	0.023	0.071	0.999	-0.398
BZ16A	DTV1_PTSD2	0.37	179.6	0.12	0.25	0.777499	0.948	0.024	0.359	0.399	0.051	0.171	0.992	-0.228
BZ17A	DTV1_PTSD2	0.33	179.6	0.24	0.65	0.854209	0.841	0.014	0.521	0.496	0.009	0.09	0.997	-0.406
BZ18A	DTV1_PTSD2	0.55	179.4	0.21	0.36	0.836316	0.922	0.016	0.464	0.492	0.03	0.16	0.996	-0.332
BZ19A	DTV1_PTSD2	0.69	179.3	0.21	0.34	0.900294	0.886	0.012	0.209	0.307	0.021	0.01	0.998	-0.297
BZ20A	DTV1_PTSD2	0.73	179.2	0.26	0.37	0.898193	0.887	0.01	0.448	0.469	0.005	0.076	0.999	-0.393
PA102A	DTV1_PTSD2	0.27	179.6	0.26	0.33	1.04184	0.888	0.009	0.392	0.365	0.009	0.027	0.999	-0.338
PA104A	DTV1_PTSD2	0.57	179.1	0.48	0.45	1.05345	0.903	0.007	0.288	0.236	0.008	0.009	0.999	-0.227
PA105A	DTV1_PTSD2	0.77	178.8	0.6	0.37	1.1822	0.832	0.011	0.238	0.273	0	0.072	0.998	-0.201
PA107A	DTV1_PTSD2	0.23	179.6	0.42	0.62	1.17203	0.82	0.013	0.093	0.087	0.013	0.038	0.998	-0.049
PA108A	DTV1_PTSD3	0.25	179.6	0.21	0.21	0.988485	0.905	0.01	0.22	0.208	0.014	0.008	0.999	-0.2
PA109A	DTV1_PTSD3	0.52	179.2	0.39	0.29	1.02316	0.886	0.012	0.122	0.217	0.016	0.092	0.998	-0.125
PA110A	DTV1_PTSD3	0.19	179.7	0.36	0.58	1.01712	0.886	0.013	0.021	0.145	0.017	0.118	0.998	-0.027
PA111A	DTV1_PTSD3	0.41	179.4	0.32	0.25	1.01294	0.912	0.016	0.006	0.113	0.007	0.103	0.997	-0.01
PA112A	DTV1_PTSD3	0.3	179.6	0.27	0.39	0.996485	0.917	0.041	0.284	0.193	0.059	0.403	0.977	0.21
PA114A	DTV1_PTSD3	0.25	179.7	0.21	0.27	1.00286	1.029	0.006	0.013	0.008	0.004	0	1	-0.008
PA115A	DTV1_PTSD3	0.42	179.4	0.33	0.33	1.03647	0.897	0.022	0.236	0.013	0.038	0.219	0.994	0.206
PA116A	DTV1_PTSD3	0.33	179.5	0.28	0.31	1.00378	0.894	0.029	0.452	0.131	0.039	0.275	0.989	0.144
PA117A	DTV1_PTSD3	0.24	179.6	0.25	0.27	1.03953	0.931	0.009	0.135	0.052	0.015	0.079	0.999	0.027
PA118A	DTV1_PTSD3	0.3	179.6	0.38	0.59	0.890016	1.002	0.03	0.629	0.285	0.037	0.288	0.987	0.003
PA119A	DTV1_PTSD3	0.13	179.8	0.12	0.15	1.03117	0.98	0.012	0.073	0.04	0.011	0.108	0.998	0.068
PA120A	DTV1_PTSD3	0.24	179.6	0.22	0.25	1.06561	0.922	0.019	0.216	0.015	0.036	0.185	0.995	0.17
PA121A	DTV1_PTSD3	0.23	179.7	0.22	0.29	1.01468	0.973	0.023	0.348	0.095	0.036	0.219	0.993	0.124
PA123A	DTV1_PTSD3	0.05	179.9	0.15	0.25	1.03555	0.992	0.025	0.507	0.233	0.038	0.245	0.991	0.012
PA124A	DTV1_PTSD3	0.22	179.7	0.19	0.2	1.06497	1.001	0.017	0.195	0.035	0.026	0.161	0.996	0.126
PA125A	DTV1_PTSD3	0.22	179.7	0.21	0.32	1.03398	0.973	0.041	0.609	0.162	0.04	0.384	0.977	0.222
PA126A	DTV1_PTSD3	0.32	179.5	0.27	0.3	1.11011	0.931	0.006	0.045	0.015	0.004	0.022	0.999	0.007
PA127A	DTV1_PTSD3	0.19	179.7	0.2	0.29	1.05325	0.962	0.022	0.235	0.009	0.042	0.216	0.993	0.207
PA128A	DTV1_PTSD3	0.28	179.6	0.2	0.15	1.4518	0.731	0.023	0.091	0.037	0.042	0.147	0.993	0.11
PL03A	DTV1_PTSD3	0.65	179.1	0.66	1	1.10985	0.9	0.011	0.021	0.087	0.017	0.11	0.998	0.023
PL09A	DTV1_PTSD3	0.53	177.5	2.47	2.53	0.683173	0.303	0.062	1.46	1.435	0.003	0.596	0.947	-0.839
PL10A	DTV1_PTSD3	0.26	179.6	0.24	0.28	1.05204	0.839	0.008	0.255	0.273	0.016	0.077	0.999	-0.196
PL13A	DTV1_PTSD3	0.26	179.6	0.4	0.72	0.998365	0.862	0.014	0.323	0.353	0.03	0.093	0.997	-0.26
PL16A	DTV1_PTSD3	0.18	179.7	0.19	0.26	1.0512	0.923	0.011	0.123	0.178	0.027	0.073	0.998	-0.105
PL17A	DTV1_PTSD3	0.35	179.5	0.25	0.31	1.04667	0.994	0.009	0.073	0.121	0.023	0.064	0.999	-0.057
PL18A	DTV1_PTSD3	0.28	179.6	0.19	0.18	1.12784	0.946	0.01	0.035	0.057	0.012	0.091	0.998	0.034
PL19A	DTV1_PTSD3	0.16	179.8	0.24	0.42	1.03972	0.947	0.003	0.077	0.083	0.002	0.004	1	-0.079
PL21A	DTV1_PTSD3	0.53	179.2	0.39	0.16	1.08536	0.934	0.007	0.074	0.127	0.01	0.029	0.999	-0.098
PL22A	DTV1_PTSD3	0.21	179.7	0.2	0.27	1.11758	0.977	0.009	0.057	0.037	0.017	0.091	0.999	0.054
PL24A	DTV1_PTSD3	0.72	178.9	0.54	0.31	1.14018	0.917	0.012	0.226	0.108	0.018	0.115	0.998	0.007
PL25A	DTV1_PTSD3	0.37	179.5	0.28	0.24	1.08228	0.947	0.003	0.085	0.066	0.007	0.026	1	-0.04
PL27A	DTV1_PTSD3	0.67	179.1	1.38	2.47	1.07638	0.913	0.01	0.011	0.078	0.017	0.079	0.999	0.001
PL28A	DTV1_PTSD3	0.22	179.7	0.33	0.58	1.26728	0.754	0.073	0.553	0.03	0.305	0.603	0.927	0.573
PL30A	DTV1_PTSD3	0.43	179.5	0.28	0.4	1.06366	1.11	0.01	0.064	0.133	0.02	0.08	0.999	-0.053
PL32A	DTV1_PTSD3	0.36	179.5	0.3	0.32	1.01579	1.064	0.004	0.014	0.026	0.005	0.015	1	-0.011
PL40A	DTV1_PTSD3	0.33	179.5	0.38	0.64	1.05017	1.032	0.025	0.188	0.056	0.003	0.16	0.992	0.104
PL41A	DTV1_PTSD3	0.55	179.1	0.5	0.42	0.968885	1.029	0.007	0.081	0.038	0.006	0.041	0.999	0.003
P1502A	DTVT_PTSD	8.66	168.9	5.36	5.71	0.582628	1.195	0.018	0.137	0.207	0.002	0.077	0.995	-0.13
P2400A	DTVT_PTSD	4.25	174.3	2.91	2.93	1.03857	1.092	0.025	0.078	0.266	0.055	0.19	0.991	-0.076
P4000A	DTVT_PTSD	11.11	164.6	8.94	10.53	0.847386	0.449	0.194	0.531	0.65	0.042	1.846	0.543	1.196
FRBB5.1A	FRK1_PTSD	0.19	0.3	0.26	0.33	0.983312	0.904	0.008	0.178	0.241	0.001	0.037	0.999	-0.204
FRCG2.3A	FRK1_PTSD	3.04	4.9	2.55	1.57	0.976282	0.923	0.007	0.176	0.176	0.003	0.025	0.999	-0.151
FRCH2.4A	FRK1_PTSD	0.54	1.1	0.97	1.12	0.974999	0.999	0.002	0.085	0.089	0.001	0.013	1	-0.076
FRLG4.4A	FRK1_PTSD	1.23	2	1.22	1.13	0.992472	0.954	0.006	0.059	0.053	0.005	0	0.999	-0.053
FRSG2.4.1A	FRK1_PTSD	0.95	1.9	1.24	1.09	0.959996	1.04	0.003	0.092	0.072	0.004	0.008	1	-0.064
FRSG3.5.3A	FRK1_PTSD	0.09	0.1	0.26	0.39	0.986084	1.011	0.008	0.191	0.134	0.007	0.037	0.999	-0.097
FRTB7.1A	FRK1_PTSD	0.49	0.8	0.47	0.46	0.906951	1.074	0.006	0.125	0.048	0.002	0.043	0.999	-0.005
F2BB5.1B	FRK2_PTSD	0.08	0.2	0.21	0.28	0.966782	0.975	0.008	0.146	0.123	0	0.052	0.999	-0.071
F2CG2.3B	FRK2_PTSD	3.31	5.6	2.94	1.71	0.978734	0.896	0.01	0.215	0.144	0.003	0.075	0.999	-0.069
F2CH2.4B	FRK2_PTSD	0.37	0.7	0.83	1.05	0.96416	0.997	0.011	0.12	0.084	0	0.022	0.998	-0.062
F2GR3.7B	FRK2_PTSD	0.81	1.1	0.63	0.7	0.768836	0.911	0.021	0.281	0.357	0.026	0.054	0.994	-0.303
F2LG4.4B	FRK2_PTSD	1.03	1.8	1.05	0.91	0.981736	0.898	0.007	0.179	0.151	0.003	0.015	0.999	-0.136
F2SG2.4.1B	FRK2_PTSD	1.15	2.2	1.29	0.96	0.920956	1.023	0.004	0.129	0.152	0.001	0.024	1	-0.128
F2SG3.5.3B	FRK2_PTSD	0.1	0.2	0.24	0.37	0.979562	0.946	0.012	0.2	0.126	0.014	0.076	0.998	-0.05
F2TB7.1B	FRK2_PTSD	0.49	0.8	0.44	0.37	0.891106	1.006	0.007	0.126	0.124	0.01	0.009	0.999	-0.115
P1CA7-6A	FRK3_PTSD	0.42	0.7	0.86	1.26	0.992154	1.019	0.003	0.044	0.034	0.001	0.005	1	-0.029
P1PW4-2B	FRK3_PTSD	0.14	0.2	0.21	0.27	0.996256	0.99	0.004	0.099	0.042	0.003	0.021	1	-0.021
P1QA4-1B	FRK3_PTSD	0.3	0.5	0.35	0.43	0.956761	0.947	0.003	0.06	0.063	0.003	0.003	1	-0.06
P1SG3.61A	FRK3_PTSD	0.45	0.6	0.32	0.28	1.00155	1.037	0.009	0.206	0.131	0.008	0.057	0.999	-0.074
P1TB3-1B	FRK3_PTSD	0.18	0.4	0.47	0.58	0.973402	1.051	0.01	0.322	0.261	0.007	0.066	0.999	-0.195
P1TB9.10B	FRK3_PTSD	0.09	0.2	0.38	0.47	0.977989	1.071	0.003	0.12	0.104	0.004	0.011	1	-0.093
S1BG1.3A	FRK3_PTSD	0.23	0.5	0.48	0.6	0.944414	1.001	0.012	0.147	0.134	0.015	0.022	0.998	-0.112
S1BP4.3B	FRK3_PTSD	0.47	0.9	0.49	0.34	0.980262	1.042	0.003	0.128	0.155	0.001	0.021	1	-0.134
S1CA2.2B	FRK3_PTSD	0.18	0.3	0.39	0.69	0.972076	1.004	0.013	0.135	0.041	0.008	0.093	0.998	0.052
S1KL18.2A	FRK3_PTSD	0.6	1	0.65	0.61	0.991713	0.969	0.008	0.14	0.069	0.005	0.067	0.999	-0.002
S1NU21.1B	FRK3_PTSD	0.63	1	0.56	0.45	0.995713	1.001	0.005	0.096	0.056	0.003	0.013	1	-0.043
S1PW2.1A	FRK3_PTSD	0.41	0.7	0.41	0.42	1.00432	0.921	0.004	0.086	0.068	0.004	0.01	1	-0.058
S1QA4.3A	FRK3_PTSD	0.31	0.4	0.32	0.48	0.947108	0.939	0.005	0.054	0.03	0.001	0.023	1	-0.007
T1BG2.1A	FRK3_PTSD	0.15	0.2	0.27	0.39	-582.788	0.001	0.074	1.991	0.14	0.118	0.604	0.929	0.464
T1BP6.1A	FRK3_PTSD	0.22	0.4	0.3	0.29	0.987997	1.044	0.003	0.062	0.047	0.001	0.015	1	-0.032
T1PW10.1B	FRK3_PTSD	0.15	0.2	0.43	0.66	0.988916	0.922	0.001	0.133	0.11	0.001	0.003	1	-0.107
T1QA2.1A	FRK3_PTSD	0.78	1	0.51	0.67	0.739698	0.993	0.01	0.202	0.272	0.003	0.069	0.999	-0.203
T1SG34.1A	FRK3_PTSD	0.23	0.3	0.2	0.23	0.980268	1.01	0.009	0.146	0.073	0.01	0.043	0.999	-0.03
T1TB7.4B	FRK3_PTSD	0.15	0.4	0.22	0.18	0.993465	0.985	0.004	0.103	0.098	0.007	0.03	1	-0.068
BP6.2B	FRK4_PTSD	0.04	0.1	0.25	0.37	0.953423	1.145	0.006	0.084	0.097	0.004	0.008	1	-0.089
BP9.6A	FRK4_PTSD	0.17	0.3	0.32	0.44	0.826473	0.406	0.086	0.112	0.711	0.066	0.774	0.906	0.063
GR4.4B	FRK4_PTSD	0.25	0.4	0.21	0.22	1.01548	0.01	0.306	0.129	1.422	0.399	1.421	0.155	-0.001
LG3.3A	FRK4_PTSD	0.41	0.7	0.48	0.47	0.928059	1.077	0.008	0.055	0.077	0.012	0.051	0.999	-0.026
NU152B	FRK4_PTSD	0.35	0.6	0.33	0.28	0.91683	1.085	0.008	0.199	0.157	0.006	0.061	0.999	-0.096
PW101A	FRK4_PTSD	0.42	0.7	0.65	0.96	0.878969	0.997	0.021	0.19	0.149	0.006	0.018	0.994	-0.131
PW3.1B	FRK4_PTSD	0.19	0.4	0.38	0.47	0.856435	1.046	0.022	0.325	0.26	0.004	0.074	0.994	-0.186
PW6-3A	FRK4_PTSD	0.58	0.9	0.73	0.92	0.875143	1.033	0.019	0.108	0.145	0.015	0.06	0.996	-0.085
QA4.3B	FRK4_PTSD	0.62	1	0.78	1.04	0.754378	0.931	0.021	0.292	0.423	0.008	0.04	0.994	-0.383
M24.1D	M2_PTSD	0.12	0.3	0.31	0.38	0.996437	1.016	0.002	0.035	0.034	0	0.004	1	-0.03
M24.4B	M2_PTSD	0.57	1.3	0.71	0.42	1.00623	1.016	0.004	0.031	0.009	0.005	0.048	1	0.039
M24.9E	M2_PTSD	0.19	0.4	0.24	0.12	0.99981	1.032	0.002	0.038	0.015	0.004	0.027	1	0.012
M25.10B	M2_PTSD	0.76	1	0.52	0.64	0.544832	1.136	0.008	0.39	0.527	0.012	0.051	0.999	-0.476
M25.4B	M2_PTSD	1.97	2.1	0.49	0.63	0.872109	1.122	0.003	0.073	0.058	0	0.014	1	-0.044
M25.6D	M2_PTSD	0.85	1	0.43	0.64	0.962537	1.231	0.006	0.003	0.061	0.021	0.058	0.999	-0.003
M26.1E	M2_PTSD	0.22	0.6	0.32	0.22	0.95756	1.069	0.002	0.057	0.047	0.002	0.007	1	-0.04
M26.4A	M2_PTSD	0.26	0.7	0.55	0.55	0.945567	1.08	0.005	0.124	0.042	0.004	0.071	0.999	0.029
M26.5D	M2_PTSD	0.62	1.8	1.08	0.8	0.959255	1.1	0.003	0.102	0.073	0.003	0.019	1	-0.054
M27.3A	M2_PTSD	0.16	0.4	0.53	0.62	0.858795	1.349	0.021	0.347	0.116	0.01	0.252	0.992	0.136
M27.5B	M2_PTSD	0.12	0.2	0.67	0.96	-0.0032514	-244.993	-0.367	2.369	0.284	0.707	2.481	0.08	2.197
M28.7A	M2_PTSD	0.92	1.2	0.73	1.02	0.779214	0.965	0.006	0.071	0.104	0.004	0.056	0.999	-0.048
MD1.2C	MD_PTSD	0.11	0.2	0.35	0.47	0.888163	1.019	0.004	0.089	0.123	0.01	0.052	1	-0.071
MD2.11D	MD_PTSD	0.11	0.3	0.42	0.48	0.959924	1.96	0.023	0.181	0.301	0.015	0.423	0.984	0.122
MD2.3D	MD_PTSD	2.77	5.8	3.13	1.57	0.841357	0.223	0.037	0.161	0.556	0.065	0.635	0.956	0.079
MD2.8B	MD_PTSD	0.05	0.1	0.5	0.6	0.959693	2.46	0.053	0.129	1.038	0.076	0.857	0.913	-0.181
MD3.1E	MD_PTSD	0.19	0.6	0.51	0.54	0.943722	1.085	0.003	0.172	0.127	0.001	0.049	1	-0.078
MD3.4E	MD_PTSD	0.17	0.5	0.52	0.58	0.944713	1.118	0.003	0.182	0.142	0.001	0.041	1	-0.101
MD3.7C	MD_PTSD	0.11	0.3	0.23	0.21	0.909379	1.153	0.003	0.285	0.234	0.001	0.052	1	-0.182
MZM6H1.1B	MZ_PTSD	0.22	179.4	0.34	0.26	0.875033	1.32	0.005	0.258	0.332	0.008	0.054	1	-0.278
MZM6H2A.1B	MZ_PTSD	0.11	179.7	0.19	0.17	0.896803	1.35	0.005	0.258	0.325	0.009	0.053	1	-0.272
MZM6H2A.1D	MZ_PTSD	0.1	179.8	0.27	0.31	0.902539	1.372	0.007	0.237	0.34	0.012	0.084	0.999	-0.256
MZMD2.11A	MZ_PTSD	0.13	179.6	0.28	0.27	0.944761	1.22	0.004	0.247	0.25	0.002	0.022	1	-0.228
MZMD2.12A	MZ_PTSD	0.11	179.7	0.37	0.41	0.949999	1.219	0.003	0.262	0.252	0.001	0.018	1	-0.234
MZMD2.12E	MZ_PTSD	0.13	179.6	0.45	0.51	0.943943	1.185	0.002	0.313	0.286	0.001	0.007	1	-0.279
MZMD2.4A	MZ_PTSD	0.21	179.3	0.64	0.66	0.951923	1.021	0.002	0.199	0.191	0.001	0.012	1	-0.179
MZMD2.4D	MZ_PTSD	0.15	179.5	0.67	0.75	0.935927	1.037	0.003	0.217	0.193	0.002	0.002	1	-0.191
MZMD2.5D	MZ_PTSD	0.17	179.4	0.59	0.64	0.935988	1.062	0.003	0.213	0.18	0.001	0.015	1	-0.165
MZMD2.6C	MZ_PTSD	0.05	179.8	0.15	0.15	0.913227	1.123	0.004	0.262	0.212	0	0.034	1	-0.178
MZMD2.7E	MZ_PTSD	0.15	179.5	0.27	0.19	0.92431	1.038	0.006	0.213	0.252	0.008	0.069	0.999	-0.183
MZMD3.1A	MZ_PTSD	0.06	179.8	0.35	0.41	0.913067	1.197	0.005	0.289	0.243	0.003	0.058	0.999	-0.185
MZMD3.2A	MZ_PTSD	0.1	179.7	0.55	0.65	0.898345	1.109	0.003	0.23	0.235	0	0.025	1	-0.21
MZMD3.2C	MZ_PTSD	0.14	179.6	0.55	0.62	0.8889	1.133	0.006	0.309	0.27	0.003	0.079	0.999	-0.191
MZMD3.3A	MZ_PTSD	0.13	0.4	0.41	0.44	0.005347	164.799	0.316	1.361	0.269	1.082	1.684	0.003	1.415
MZMD3.3D	MZ_PTSD	0.11	179.7	0.35	0.38	0.00408597	256.324	0.214	1.345	0.257	0.59	1.597	0.319	1.34
MZMD3.8A	MZ_PTSD	0.04	179.9	0.25	0.3	0.867015	1.101	0.003	0.413	0.429	0.002	0.008	1	-0.421
MZMD6.2D	MZ_PTSD	0.44	178.8	0.74	0.57	0.941079	1.309	0.002	0.249	0.263	0.005	0.024	1	-0.239
OTMD2.10C	OT_PTSD	0.17	179.6	0.3	0.29	0.977501	1.067	0.003	0.221	0.22	0.003	0.008	1	-0.212
OTMD2.13B	OT_PTSD	0.21	179.6	0.23	0.25	0.911029	0.944	0.006	0.265	0.338	0.01	0.079	0.999	-0.259
OTMD2.5A	OT_PTSD	0.11	179.8	0.33	0.42	0.932039	0.975	0.007	0.243	0.302	0.005	0.065	0.999	-0.237
OTMD2.6A	OT_PTSD	0.03	179.9	0.13	0.17	0.941717	1.011	0.005	0.222	0.246	0.002	0.039	1	-0.207
OTMD2.9B	OT_PTSD	0.08	179.8	0.4	0.48	0.943083	1.059	0.002	0.211	0.207	0	0.006	1	-0.201
OTMD3.2D	OT_PTSD	0.12	179.6	0.49	0.56	0.921918	1.02	0.007	0.369	0.279	0.004	0.099	0.999	-0.18
OTMD3.6A	OT_PTSD	0.08	179.8	0.31	0.36	0.964687	1.113	0.004	0.249	0.198	0.002	0.053	1	-0.145
OTMD3.8E	OT_PTSD	0.32	179.2	0.5	0.36	0.91845	1.036	0.005	0.158	0.211	0.01	0.05	1	-0.161
OTMD4.2C	OT_PTSD	0.08	179.8	0.16	0.17	0.99503	1.001	0.004	0.099	0.069	0.007	0.044	1	-0.025
OTMD4.7E	OT_PTSD	0.54	178.7	0.96	0.92	0.991812	1.003	0.003	0.092	0.079	0.006	0.032	1	-0.047
OTMD6.1B	OT_PTSD	0.47	178.7	0.73	0.45	0.976191	1.007	0.003	0.178	0.14	0.003	0.025	1	-0.115
OTMD6.3B	OT_PTSD	0.28	179.2	0.5	0.39	0.966989	1.029	0.003	0.158	0.142	0.001	0.004	1	-0.138
OTMD6.5A	OT_PTSD	0.94	177.2	1.53	0.92	0.979306	1.001	0.004	0.188	0.13	0.002	0.045	1	-0.085
OTNH53BC	OT_PTSD	0.84	178.7	1	1.36	0.95863	0.971	0.008	0.058	0.009	0.005	0.062	0.999	0.053
OTNH53CA	OT_PTSD	1.16	178.1	1.17	1.21	0.951766	0.966	0.009	0.068	0.008	0.002	0.065	0.999	0.057
OTNH53CC	OT_PTSD	0.7	178.9	0.89	1.26	0.942814	0.968	0.009	0.053	0.029	0.009	0.074	0.999	0.045
OZBM6.1CA	OZ_PTSD	0.37	179.6	0.23	0.77	0.00812604	91.031	0.243	1.221	0.171	0.887	1.405	0.195	1.234
OZBM6.3D	OZ_PTSD	0.31	179.7	0.21	0.53	0.81473	0.995	0.008	0.129	0.213	0.019	0.081	0.999	-0.132
OZBM6.4BB	OZ_PTSD	0.17	179.7	0.29	0.37	0.922035	1.068	0.004	0.148	0.113	0.003	0.048	1	-0.065
OZBM6.5BD	OZ_PTSD	0.45	179.5	0.22	0.47	0.656222	0.958	0.006	0.053	0.127	0.019	0.063	0.999	-0.064
OZBM7.1AA	OZ_PTSD	0.04	179.9	0.16	0.23	0.967259	1.006	0.003	0.047	0.038	0.003	0.015	1	-0.023
OZBM7.1BC	OZ_PTSD	0.1	179.8	0.16	0.16	0.980671	0.986	0.004	0.05	0.046	0.002	0.012	1	-0.034
OZBM7.4BA	OZ_PTSD	0.36	179.1	0.52	0.37	0.965003	1.004	0.004	0.061	0.095	0.004	0.039	1	-0.056
OZMD2.10A	OZ_PTSD	0.16	179.6	0.32	0.3	0.997953	1.083	0.003	0.064	0.035	0.003	0.024	1	-0.011
OZMD2.11C	OZ_PTSD	0.05	179.9	0.15	0.16	0.984781	1.135	0.004	0.063	0	0.004	0.057	1	0.057
OZMD2.4C	OZ_PTSD	0.15	179.5	0.5	0.53	0.993606	1.07	0.002	0.011	0.009	0.003	0.004	1	-0.005
OZMD3.1C	OZ_PTSD	0.05	179.8	0.34	0.4	0.984495	1.579	0.016	0.072	0.152	0.01	0.219	0.995	0.067
OZMD3.3E	OZ_PTSD	0.13	179.6	0.45	0.48	0.992146	1.807	0.017	0.023	0.209	0.006	0.229	0.994	0.02
OZMD3.4A	OZ_PTSD	0.12	179.6	0.38	0.4	0.991642	1.586	0.019	0.018	0.252	0.012	0.268	0.993	0.016
OZMD4.5C	OZ_PTSD	0.17	179.6	0.34	0.34	0.992641	1.199	0.012	0.017	0.143	0.016	0.16	0.997	0.017
OZMD4.6C	OZ_PTSD	0.16	179.6	0.4	0.45	0.996841	1.228	0.011	0.004	0.15	0.014	0.154	0.998	0.004
OZMD6.1A	OZ_PTSD	0.45	178.7	0.7	0.36	0.997355	1.72	0.02	0.025	0.293	0.017	0.311	0.992	0.018
OZMD6.2A	OZ_PTSD	0.4	178.8	0.81	0.7	0.991056	1.952	0.02	0.041	0.276	0.016	0.306	0.993	0.03
OZMD6.3C	OZ_PTSD	0.24	179.3	0.57	0.57	0.985482	1.802	0.014	0.024	0.198	0.011	0.215	0.996	0.017
OZMD6.5C	OZ_PTSD	0.85	177.3	1.45	0.9	0.993154	2.184	0.022	0.004	0.345	0.017	0.342	0.991	-0.003
OZNH5.2CB	OZ_PTSD	13.62	160.6	9.01	2.17	0.976012	1.701	0.018	0.021	0.098	0.01	0.118	0.994	0.02
OZNH5.2ED	OZ_PTSD	14.16	159.4	9.66	1.75	0.973252	1.653	0.016	0.019	0.165	0.02	0.146	0.995	-0.019
OZNH5.3AD	OZ_PTSD	2.58	176.1	2.1	1.75	0.961132	1.57	0.02	0.042	0.205	0.029	0.178	0.993	-0.027
OZNH5.3CB	OZ_PTSD	4.12	173.9	3.06	1.92	0.958764	1.463	0.02	0.042	0.18	0.021	0.136	0.993	-0.044
SC12.10A1	SC_PTSD	3.16	4.9	2.55	1.63	0.955106	1.074	0.003	0.18	0.09	0.004	0.029	1	-0.061
SC12.10A2	SC_PTSD	3.84	6.1	3.18	2.03	0.937326	1.013	0.006	0.189	0.059	0.011	0.068	0.999	0.009
SC12.11A2	SC_PTSD	3.15	4.6	2.51	2.23	0.925845	1.058	0.006	0.127	0.093	0.009	0.009	0.999	-0.084
SC12.11C2	SC_PTSD	3.59	4.8	2.32	2.18	0.953553	1.106	0.006	0.059	0.101	0.006	0.039	0.999	-0.062
SC12.1A1	SC_PTSD	0.68	1.4	1.13	1.27	0.910886	1.085	0.012	0.184	0	0.005	0.142	0.996	0.142
SC12.3B1	SC_PTSD	2.24	4.2	2.27	1.29	0.946381	1.055	0.011	0.145	0.029	0.007	0.127	0.997	0.098
SC12.3B2	SC_PTSD	2.11	4	2.27	1.53	0.949298	1.06	0.01	0.101	0.043	0.007	0.105	0.997	0.062
SC12.4C1	SC_PTSD	0.11	0.2	0.35	0.58	0.943817	1.039	0.006	0.107	0.031	0.007	0.04	0.999	0.009
SC12.4C2	SC_PTSD	1.72	2.7	1.49	1.13	0.940591	1.069	0.002	0.078	0.029	0.003	0.017	1	-0.012
SC12.5A2	SC_PTSD	2.29	3.3	1.73	1.57	0.939688	1	0.01	0.196	0.012	0.012	0.114	0.998	0.102
SC12.5B2	SC_PTSD	3.52	5.1	2.65	2.23	0.94036	1.059	0.004	0.065	0.05	0.004	0.027	1	-0.023
SC12.7C2	SC_PTSD	3.26	4.6	2.33	1.79	0.945165	1.006	0.004	0.198	0.08	0.006	0.042	1	-0.038
SC12.7D1	SC_PTSD	3.53	4.7	2.22	1.83	0.939453	1.037	0.007	0.212	0.074	0.011	0.065	0.999	-0.009
SC12.8C1	SC_PTSD	1.32	2.6	1.54	1.22	0.953797	1.034	0.002	0.14	0.069	0.002	0.013	1	-0.056
SC12.9B1	SC_PTSD	2.95	4.5	2.41	1.9	0.934164	1.062	0.004	0.214	0.111	0.005	0.032	1	-0.079
SCG2.10B	SCG_PTSD	2.55	4.1	2.23	1.57	0.939516	1.072	0.009	0.227	0.055	0.01	0.035	0.999	-0.02
SCG2.11B	SCG_PTSD	3.05	5	2.84	2.43	0.984688	1.046	0.009	0.28	0.102	0.012	0.001	0.999	-0.101
SCG2.1B	SCG_PTSD	1.3	2.7	1.53	1.05	1.06092	0.983	0.003	0.078	0.036	0.005	0.009	1	-0.027
SCG2.2A	SCG_PTSD	1.4	2.7	1.55	1.08	1.04373	0.953	0.005	0.059	0.019	0.002	0.009	1	-0.01
SCG2.3A	SCG_PTSD	2.01	3.6	1.98	1.22	1.00228	0.906	0.006	0.054	0.03	0.006	0.06	0.999	0.03
SCG2.6A	SCG_PTSD	1.16	1.8	1.06	1.09	0.990439	0.897	0.009	0.067	0.059	0.014	0.088	0.999	0.029
SCG2.6B	SCG_PTSD	1.93	3.1	1.73	1.39	1.01024	0.894	0.006	0.093	0.019	0.013	0.007	0.999	-0.012
SCG2.7B	SCG_PTSD	2.5	3.6	1.85	1.42	0.997528	0.979	0.01	0.137	0.016	0.005	0.039	0.999	0.023
SW01-01A-1	SAK	0.5	1	0.94	1.14	0.997921	1.0335	0.003	0.011	0.004	0.003	0.001	0.999388	-0.003
SW01-02A-1	SAK	0.14	0.2	0.48	0.76	1.01053	0.996687	0.004	0.011	0.018	0.001	0.031	0.998837	0.013
SW01-04A-1	SAK	0.38	0.5	0.5	0.87	0.994531	0.983936	0.005	0.002	0.024	0.005	0.031	0.998323	0.007
SW01-05A-1	SAK	0.27	0.4	0.43	0.77	1.01948	0.984379	0.006	0.042	0.008	0	0.066	0.997187	0.058
SW01-06A-1	SAK	0.17	0.2	0.41	0.79	1.0201	0.963463	0.006	0.038	0.017	0.006	0.066	0.997446	0.049
SW01-08A-1	SAK	0.08	0.1	0.27	0.55	0.985306	1.00026	0.007	0.028	0.009	0.014	0.065	0.996834	0.056
SW01-09A-1	SAK	0.06	0.1	0.19	0.41	0.98959	0.992065	0.005	0.021	0.008	0.017	0.047	0.998063	0.039
SW01-10A-1	SAK	0.2	0.3	0.31	0.6	0.997043	0.97168	0.004	0.006	0.027	0.001	0.011	0.998927	-0.016
SW01-11A-1	SAK	0.06	0.1	0.28	0.57	0.980269	0.961977	0.004	0.022	0.014	0.008	0.013	0.998935	-0.001
SW01-13A-1	SAK	0.12	0.2	1.81	2.5	0.990234	0.972866	0.007	0.013	0.015	0.004	0.008	0.996118	-0.007
SW01-14A-1	SAK	0.22	0.3	0.4	0.65	0.9988	0.979882	0.004	0.015	0.033	0.012	0.025	0.998646	-0.008
SW01-15A-1	SAK	1.3	1.9	2.21	3.62	1.01802	0.973931	0.01	0.052	0.012	0.006	0.074	0.992365	0.062
SW01-16A-1	SAK	1.8	2.6	4.38	7.51	1.0162	0.985925	0.011	0.015	0.012	0.012	0.011	0.991183	-0.001
SW01-18A-1	SAK	0.11	0.1	0.21	0.43	1.00724	0.957882	0.005	0.002	0.003	0.022	0.004	0.99813	0.001
TS01-01A-1	SAK	0.1	0.2	0.76	1.31	0.998378	0.99646	0.003	0.001	0.025	0.005	0.023	0.999436	-0.002
TS01-03A-2	SAK	0.43	0.7	0.78	1.21	1.0366	0.928834	0.011	0.057	0.034	0.01	0.067	0.991134	0.033
TS01-04A-2	SAK	0.32	0.4	0.68	1.29	0.994887	0.977266	0.002	0.012	0.02	0.002	0.008	0.999623	-0.012
TS01-05A-1	SAK	0.15	0.2	0.22	0.4	1.02036	0.955862	0.004	0.009	0.017	0.005	0.009	0.999079	-0.008
TS01-06C-1	SAK	0.07	0.1	0.79	1.61	1.00018	0.98681	0.008	0.007	0.035	0.001	0.018	0.995878	-0.017
TS01-08A-1	SAK	0.06	0.1	0.33	0.63	0.986686	0.980959	0.005	0.017	0.013	0.003	0.024	0.998233	0.011
TS01-10A-1	SAK	0.1	0.2	0.81	1.25	0.997189	0.978467	0.006	0.047	0.032	0.003	0.076	0.997098	0.044
TS01-11C-1	SAK	0.12	0.2	0.76	1.21	1.01687	0.997246	0.003	0.006	0.005	0.007	0.004	0.999135	-0.001
TS01-12A-1	SAK	0.19	0.4	3.16	4.31	1.01255	1.09135	0.012	0.015	0.085	0.004	0.106	0.990156	0.021
TS01-14A-1	SAK	0.08	0.1	0.73	1.22	1.05136	0.952909	0.006	0.013	0.045	0.019	0.004	0.997493	-0.041
TS01-17A-1	SAK	0.23	0.3	0.67	1.28	1.01464	0.936769	0.005	0.021	0.013	0.003	0.016	0.998027	0.003
TS01-18A-1	SAK	0.12	0.2	0.58	1.09	1.03254	0.952661	0.007	0.014	0.013	0.01	0.007	0.995973	-0.006
TS01-19A-1	SAK	0.27	0.4	1.01	1.74	1.01555	0.972595	0.007	0.028	0.056	0.007	0.021	0.996912	-0.035
TS01-20A-1	SAK	0.04	0.1	0.61	1.23	1.03738	0.922051	0.006	0.006	0.003	0.005	0.003	0.997591	0
TS01-22A-1	SAK	0.03	0	0.5	1.1	1.02391	0.970098	0.006	0.009	0.024	0.004	0.033	0.997319	0.009
TS01-23A-1	SAK	0.06	0.1	0.3	0.64	1.01743	0.969019	0.009	0.005	0.002	0.009	0.038	0.994791	0.036
TS01-25A-1	SAK	0.12	0.1	0.43	1.04	1.00327	1.0152	0.01	0.02	0.023	0.003	0.037	0.993293	0.014
TS01-26A-1	SAK	0.27	0.4	0.84	1.56	1.01822	0.944656	0.011	0.002	0.026	0.023	0.013	0.991381	-0.013
TS02-01A-1	SAK	0.06	0.1	0.61	1.01	1.01537	0.957725	0.012	0.04	0.003	0.003	0.081	0.989277	0.078
TS02-03A-1	SAK	0.09	0.1	0.6	1.01	1.01328	0.9609	0.004	0.013	0.008	0.018	0.02	0.998585	0.012
TS02-05A-1	SAK	0.16	0.3	0.44	0.7	0.992376	0.991725	0.007	0.028	0.012	0.016	0.031	0.996299	0.019
TS02-06A-1	SAK	0.13	0.2	0.64	1.13	0.983326	0.98101	0.005	0.014	0.018	0.011	0.041	0.998407	0.023
TS02-11A-1	SAK	0.31	0.5	0.65	1.03	0.987147	1.03915	0.016	0.03	0.005	0.028	0.073	0.982251	0.068
TS02-12A-1	SAK	0.11	0.2	0.56	1	0.988155	1.04092	0.008	0.017	0.086	0.009	0.069	0.995647	-0.017
TS02-13A-1	SAK	0.24	0.3	0.66	1.18	0.994596	1.06703	0.008	0.014	0.066	0.012	0.108	0.995071	0.042
TS02-14A-1	SAK	0.31	0.4	0.46	0.75	0.989746	1.03271	0.007	0.023	0.038	0.015	0.061	0.996538	0.023
TS02-15A-1	SAK	0.2	0.3	0.82	1.33	0.985788	1.01396	0.003	0.02	0.012	0.009	0.014	0.999212	0.002
TS02-16A-1	SAK	0.6	0.8	0.72	1.19	0.96361	1.02213	0.012	0.042	0.002	0.025	0.07	0.990396	0.068
TS02-18A-1	SAK	0.07	0.1	0.66	1.08	0.999408	1.01763	0.006	0.016	0.056	0.004	0.065	0.997259	0.009
TS02-19A-1	SAK	0.4	0.6	0.88	1.52	1.00813	0.982996	0.009	0.011	0.043	0.002	0.047	0.994396	0.004
TS02-20A-1	SAK	0.3	0.5	0.93	1.47	0.982954	0.993779	0.005	0.011	0.034	0.012	0.017	0.998413	-0.017
TS02-21A-1	SAK	0.4	0.6	0.94	1.55	0.986014	1.03229	0.013	0.019	0.019	0.023	0.004	0.987187	-0.015
TS02-22A-1	SAK	0.39	0.6	0.98	1.6	1.00975	1.00751	0.011	0.004	0	0.016	0.032	0.991031	0.032
TS02-23A-1	SAK	0.02	0	0.47	0.76	1.02582	0.981097	0.007	0	0.012	0.003	0.01	0.996239	-0.002
TS02-24A-1	SAK	0.04	0.1	0.47	0.76	1.00602	1.016	0.014	0.021	0.052	0.004	0.03	0.986424	-0.022
TS02-25A-1	SAK	0.27	0.4	0.99	1.55	0.987676	1.01096	0.007	0.004	0.006	0.019	0.008	0.996402	0.002
TS02-26A-1	SAK	0.21	0.4	1	1.57	0.996133	1.0347	0.013	0.013	0.005	0.044	0.023	0.987757	0.018
