# Supplementary material for: Improvements to the Shaw-Type Absolute Palaeointensity Method
Source: Frontiers journal article supplement (doi:10.3389/feart.2021.701863), 2021-07-29
Supplement: Table_3.XLSX [file Table_3.XLSX]

## Sheet: Sheet1
crit	nn	mean	mean_95_low	mean_95_high	stdev_of_mean_values	average_stdev	stdev_95_low	stdev_95_high		H - L mean95 PI	H - L SD95 PI
SIM_PI	2	0.986225	0.679	1.385	0.145793	0.090728	0.002	0.4195		0.706	0.4175
SIM_PI	3	0.98717	0.747	1.311	0.122534	0.119431	0.0107145	0.460505		0.564	0.44979
SIM_PI	4	0.98915	0.796	1.25275	0.104613	0.134396	0.0199311	0.475067		0.45675	0.455136
SIM_PI	5	0.988183	0.8162	1.21638	0.0929343	0.145252	0.0274401	0.476026		0.400183	0.448586
SIM_PI	6	0.988235	0.83	1.19396	0.0847716	0.151966	0.0322059	0.462919		0.363963	0.430713
SIM_PI	7	0.988085	0.844	1.17696	0.0785823	0.157726	0.035975	0.453219		0.332958	0.417244
SIM_PI	8	0.987798	0.851125	1.15799	0.0736664	0.162874	0.0412728	0.456792		0.306869	0.415519
SIM_PI	9	0.988245	0.862292	1.14671	0.0692324	0.166532	0.0454817	0.454361		0.284414	0.40888
SIM_PI	10	0.989191	0.8686	1.1405	0.0663232	0.171721	0.0481302	0.446404		0.2719	0.398274
SIM_PI	11	0.988401	0.87533	1.12336	0.0616735	0.172072	0.0517742	0.432929		0.248035	0.381154
SIM_PI	12	0.989468	0.880557	1.12592	0.0603927	0.176432	0.0541775	0.421488		0.24536	0.36731
SIM_PI	13	0.988707	0.881463	1.11831	0.057926	0.177091	0.0560613	0.412511		0.236845	0.356449
SIM_PI	14	0.988451	0.886857	1.11371	0.0556173	0.178126	0.0590833	0.403366		0.226857	0.344283
SIM_PI	15	0.988415	0.8902	1.10832	0.0539013	0.180181	0.0613556	0.39263		0.218116	0.331275
SIM_PI	16	0.988567	0.893591	1.10382	0.0523775	0.181681	0.0628342	0.390459		0.210231	0.327625
SIM_PI	17	0.989083	0.895975	1.1003	0.0506801	0.182693	0.0665938	0.385234		0.204323	0.31864
SIM_PI	18	0.988716	0.9001	1.0951	0.0494267	0.185033	0.0689031	0.383857		0.194996	0.314954
SIM_PI	19	0.988485	0.901421	1.09363	0.0478187	0.184637	0.0702152	0.374219		0.192211	0.304004
SIM_PI	20	0.988219	0.90375	1.08631	0.0457235	0.185415	0.0716898	0.367906		0.182565	0.296216
SIM_PI	21	0.989569	0.905204	1.08887	0.0461119	0.187794	0.0740975	0.372159		0.183662	0.298062
SIM_PI	22	0.98875	0.907165	1.08428	0.0444214	0.18879	0.0757638	0.365321		0.177112	0.289557
SIM_PI	23	0.988483	0.909748	1.08041	0.0432759	0.188597	0.0773054	0.35949		0.170658	0.282184
SIM_PI	24	0.988456	0.909179	1.0811	0.0429564	0.190041	0.0786179	0.361952		0.171919	0.283334
SIM_PI	25	0.989151	0.913154	1.07636	0.0414155	0.191414	0.0801316	0.353402		0.163206	0.27327
SIM_PI	26	0.988792	0.913759	1.07567	0.0406575	0.191637	0.0812567	0.355234		0.161913	0.273977
SIM_PI	27	0.988706	0.915294	1.07312	0.0397731	0.191182	0.0820796	0.348201		0.157831	0.266121
SIM_PI	28	0.988891	0.916784	1.07204	0.0391932	0.190654	0.0823743	0.344942		0.155261	0.262568
SIM_PI	29	0.989078	0.917519	1.07298	0.0388699	0.193125	0.085402	0.345614		0.155462	0.260212
SIM_PI	30	0.988736	0.917665	1.07097	0.0384627	0.192751	0.0851384	0.343878		0.153303	0.258739
SIM_PI	31	0.988301	0.920577	1.06614	0.0369565	0.193898	0.0876682	0.342051		0.145565	0.254383
SIM_PI	32	0.988138	0.920848	1.06575	0.0365697	0.192449	0.0869634	0.338727		0.144899	0.251763
SIM_PI	33	0.988776	0.921815	1.06347	0.0361104	0.19417	0.0907891	0.332784		0.141654	0.241995
SIM_PI	34	0.988186	0.922827	1.06339	0.0353715	0.19375	0.0889131	0.33347		0.140558	0.244557
SIM_PI	35	0.988729	0.924782	1.06272	0.0347487	0.194002	0.0907258	0.330377		0.137938	0.239651
SIM_PI	36	0.988456	0.92392	1.06129	0.0346218	0.195022	0.0920439	0.330433		0.137372	0.238389
SIM_PI	37	0.988399	0.926046	1.06091	0.0339354	0.195032	0.093005	0.329707		0.134868	0.236702
SIM_PI	38	0.989446	0.927134	1.06249	0.0339118	0.195704	0.0941126	0.328911		0.135359	0.234798
SIM_PI	39	0.988795	0.927782	1.05856	0.0332043	0.196221	0.0948218	0.33044		0.13078	0.235618
SIM_PI	40	0.989238	0.927887	1.05744	0.0327645	0.196082	0.0964536	0.324502		0.129554	0.228049
SIM_PI	41	0.9889	0.928689	1.05747	0.0323497	0.196684	0.0974057	0.323586		0.128784	0.22618
SIM_PI	42	0.988949	0.928786	1.05716	0.0326735	0.19753	0.0988422	0.329279		0.128369	0.230436
SIM_PI	43	0.988441	0.929416	1.05555	0.0317654	0.197012	0.0999145	0.323609		0.126133	0.223694
SIM_PI	44	0.989069	0.930904	1.05662	0.0315948	0.197338	0.0982498	0.32032		0.125717	0.22207
SIM_PI	45	0.988693	0.930309	1.05466	0.0312849	0.197767	0.101808	0.320381		0.12435	0.218572
SIM_PI	46	0.987777	0.931272	1.05304	0.0304871	0.197032	0.10116	0.315389		0.12177	0.214228
SIM_PI	47	0.988549	0.932162	1.05041	0.030152	0.197937	0.102777	0.315099		0.118245	0.212322
SIM_PI	48	0.988585	0.932967	1.04987	0.0297646	0.198243	0.102777	0.315873		0.116903	0.213097
SIM_PI	49	0.988893	0.932474	1.05254	0.0304885	0.199836	0.104618	0.318381		0.12007	0.213763
SIM_PI	50	0.988353	0.933411	1.05128	0.0295833	0.198406	0.104909	0.31244		0.117872	0.207531
SIM_PI	51	0.987892	0.932626	1.04753	0.0291492	0.198717	0.106011	0.311484		0.114906	0.205473
SIM_PI	52	0.988946	0.93427	1.04947	0.0291928	0.199414	0.105641	0.314326		0.115196	0.208685
SIM_PI	53	0.988522	0.935469	1.04882	0.0287256	0.19917	0.10562	0.310211		0.113356	0.204591
SIM_PI	54	0.988955	0.936303	1.04813	0.0282941	0.199305	0.107881	0.312398		0.111828	0.204517
SIM_PI	55	0.988932	0.936338	1.04764	0.0281746	0.199901	0.11003	0.309968		0.111297	0.199938
SIM_PI	56	0.988874	0.936787	1.04887	0.0281571	0.199712	0.107904	0.308447		0.11208	0.200543
SIM_PI	57	0.988825	0.936674	1.04599	0.0275978	0.199652	0.110418	0.308415		0.109312	0.197997
SIM_PI	58	0.9888	0.937788	1.04579	0.0274566	0.200087	0.111293	0.309034		0.107998	0.197741
SIM_PI	59	0.988651	0.937891	1.04488	0.0271489	0.200051	0.111686	0.306415		0.10699	0.19473
SIM_PI	60	0.988648	0.938761	1.04459	0.0266787	0.200269	0.11365	0.308024		0.105829	0.194375
SIM_PI	61	0.988837	0.939416	1.04302	0.0262941	0.200364	0.112853	0.30716		0.103603	0.194307
SIM_PI	62	0.98887	0.94025	1.04525	0.0264241	0.199814	0.112805	0.304454		0.104999	0.191649
SIM_PI	63	0.9888	0.939889	1.04228	0.0262187	0.200856	0.116443	0.302682		0.102396	0.186239
SIM_PI	64	0.988729	0.94139	1.04291	0.0260863	0.200166	0.113999	0.301677		0.101519	0.187678
SIM_PI	65	0.988994	0.941055	1.0435	0.0257044	0.20134	0.114623	0.30396		0.102444	0.189337
SIM_PI	66	0.988861	0.941378	1.04249	0.0255262	0.20124	0.11728	0.300144		0.101116	0.182864
SIM_PI	67	0.988942	0.94156	1.04106	0.0252055	0.201081	0.115411	0.300439		0.0994991	0.185027
SIM_PI	68	0.988611	0.941335	1.04019	0.0252355	0.201435	0.118075	0.297699		0.0988572	0.179624
SIM_PI	69	0.988986	0.942453	1.03861	0.0247442	0.201655	0.117879	0.297941		0.0961598	0.180063
SIM_PI	70	0.98886	0.942941	1.04147	0.0248631	0.201382	0.119852	0.298467		0.0985339	0.178615
SIM_PI	71	0.988629	0.942666	1.04113	0.0248129	0.20079	0.117559	0.299814		0.0984589	0.182255
SIM_PI	72	0.988774	0.943102	1.03945	0.0244911	0.202646	0.118322	0.30025		0.0963442	0.181928
SIM_PI	73	0.98885	0.943068	1.03937	0.0241877	0.20238	0.119679	0.299171		0.0962995	0.179491
SIM_PI	74	0.98892	0.943053	1.03887	0.0241279	0.201862	0.120807	0.297619		0.0958153	0.176812
SIM_PI	75	0.988587	0.943426	1.03802	0.0239676	0.201594	0.120479	0.294177		0.0945899	0.173698
SIM_PI	76	0.988583	0.944248	1.03802	0.0236993	0.200974	0.120582	0.295248		0.0937707	0.174666
SIM_PI	77	0.989032	0.944252	1.03687	0.023792	0.202942	0.122427	0.29577		0.0926151	0.173343
SIM_PI	78	0.988914	0.945096	1.03773	0.023365	0.2019	0.122701	0.295609		0.0926362	0.172909
SIM_PI	79	0.988362	0.944515	1.03593	0.0233679	0.202186	0.124166	0.294863		0.0914144	0.170697
SIM_PI	80	0.988602	0.945563	1.03639	0.0233299	0.202374	0.123072	0.293054		0.0908264	0.169982
SIM_PI	81	0.9888	0.945838	1.03527	0.0228699	0.202377	0.123525	0.293776		0.0894329	0.170252
SIM_PI	82	0.988941	0.945865	1.03498	0.0229484	0.202735	0.125227	0.294049		0.089114	0.168822
SIM_PI	83	0.988735	0.946283	1.03638	0.0229213	0.202177	0.125254	0.292879		0.0901001	0.167625
SIM_PI	84	0.988693	0.9458	1.03515	0.0228289	0.202214	0.124122	0.293311		0.0893489	0.169189
SIM_PI	85	0.988448	0.946556	1.03388	0.0223357	0.20165	0.125029	0.290808		0.0873215	0.165779
SIM_PI	86	0.98889	0.946493	1.03471	0.022402	0.202433	0.126215	0.289801		0.0882144	0.163586
SIM_PI	87	0.988547	0.947023	1.0339	0.0221467	0.202077	0.125761	0.289899		0.0868814	0.164139
SIM_PI	88	0.989018	0.94768	1.03446	0.0220812	0.20249	0.125843	0.290615		0.0867783	0.164772
SIM_PI	89	0.988943	0.947109	1.03421	0.0221981	0.202825	0.128293	0.287612		0.0871051	0.159319
SIM_PI	90	0.98888	0.946876	1.03441	0.0220242	0.202944	0.128202	0.288667		0.0875334	0.160464
SIM_PI	91	0.988638	0.947734	1.03256	0.0217318	0.203102	0.129664	0.286493		0.0848293	0.156829
SIM_PI	92	0.988956	0.947975	1.03318	0.021794	0.202709	0.128616	0.287746		0.0852057	0.15913
SIM_PI	93	0.988478	0.947523	1.03275	0.0216713	0.202887	0.129008	0.285661		0.0852226	0.156654
SIM_PI	94	0.988867	0.948584	1.03352	0.0214499	0.203125	0.129067	0.289414		0.0849342	0.160346
SIM_PI	95	0.988929	0.948834	1.03336	0.021316	0.203269	0.128444	0.287806		0.0845286	0.159362
SIM_PI	96	0.988893	0.948627	1.03316	0.0214033	0.203423	0.132047	0.287087		0.0845316	0.15504
SIM_PI	97	0.988438	0.948671	1.03046	0.0211557	0.202653	0.130319	0.285593		0.0817857	0.155274
SIM_PI	98	0.988824	0.949772	1.03146	0.0208662	0.202945	0.129734	0.283899		0.0816867	0.154165
SIM_PI	99	0.988597	0.950124	1.0304	0.0207027	0.203199	0.131398	0.286411		0.0802774	0.155012
SIM_PI	100	0.98884	0.94961	1.03106	0.0205661	0.203493	0.132404	0.284369		0.0814533	0.151965
SIM_PI	101	0.988595	0.94934	1.03234	0.0208118	0.203132	0.131158	0.282887		0.0830039	0.151729
SIM_PI	102	0.988695	0.949683	1.03028	0.0203835	0.203758	0.131767	0.283		0.0805979	0.151233
SIM_PI	103	0.989032	0.950735	1.03104	0.0206388	0.204082	0.132179	0.284016		0.0803	0.151836
SIM_PI	104	0.98886	0.95062	1.03106	0.0204074	0.203435	0.132346	0.283035		0.0804396	0.15069
SIM_PI	105	0.988691	0.950639	1.03027	0.0203242	0.202903	0.132814	0.282487		0.0796359	0.149672
SIM_PI	106	0.989048	0.951012	1.03029	0.0201988	0.203539	0.132522	0.282654		0.0792828	0.150132
SIM_PI	107	0.988399	0.950501	1.0293	0.0200471	0.203507	0.132736	0.280786		0.0787975	0.148049
SIM_PI	108	0.988623	0.95011	1.03065	0.020238	0.203668	0.134525	0.281455		0.0805392	0.14693
SIM_PI	109	0.988594	0.951649	1.02889	0.0197832	0.203011	0.133765	0.280248		0.0772392	0.146483
SIM_PI	110	0.988668	0.95093	1.02946	0.0199907	0.203387	0.134659	0.28073		0.07853	0.146071
SIM_PI	111	0.988799	0.951592	1.0287	0.0197184	0.203263	0.132551	0.28148		0.0771083	0.148929
SIM_PI	112	0.988839	0.951004	1.02944	0.0199019	0.204169	0.135338	0.280786		0.0784373	0.145447
SIM_PI	113	0.988766	0.95207	1.02857	0.0195914	0.204445	0.136645	0.281345		0.0764955	0.1447
SIM_PI	114	0.988521	0.951509	1.02855	0.0194394	0.203307	0.134998	0.277818		0.0770442	0.14282
SIM_PI	115	0.988634	0.951747	1.02835	0.0194586	0.203808	0.136258	0.280118		0.076602	0.14386
SIM_PI	116	0.988411	0.951325	1.02797	0.0194183	0.203906	0.136885	0.278527		0.076641	0.141642
SIM_PI	117	0.988634	0.952435	1.02736	0.0191436	0.203586	0.13697	0.277288		0.0749296	0.140318
SIM_PI	118	0.988355	0.952102	1.02658	0.018989	0.203632	0.137313	0.277094		0.0744802	0.139782
SIM_PI	119	0.988792	0.952967	1.02819	0.0192297	0.204118	0.135178	0.280441		0.0752235	0.145263
SIM_PI	120	0.988843	0.952571	1.02816	0.0191614	0.204431	0.137375	0.278834		0.0755843	0.141459
SIM_PI	121	0.988565	0.952238	1.02731	0.0189457	0.203943	0.137217	0.276928		0.0750736	0.139711
SIM_PI	122	0.988886	0.95369	1.02694	0.0187681	0.204372	0.138573	0.277349		0.0732509	0.138776
SIM_PI	123	0.989074	0.953398	1.0273	0.0188694	0.205195	0.138009	0.278779		0.0738981	0.140769
SIM_PI	124	0.988512	0.952847	1.02722	0.0186779	0.203431	0.138534	0.275947		0.074375	0.137413
SIM_PI	125	0.988624	0.953628	1.02648	0.0186132	0.203919	0.139863	0.27712		0.0728556	0.137257
SIM_PI	126	0.988297	0.953587	1.02565	0.0184396	0.203567	0.13765	0.276021		0.0720595	0.138372
SIM_PI	127	0.988662	0.953239	1.02647	0.0184179	0.204216	0.140011	0.277052		0.0732313	0.137041
SIM_PI	128	0.988731	0.953621	1.02626	0.0184205	0.204251	0.139638	0.275319		0.0726362	0.13568
SIM_PI	129	0.988831	0.953544	1.02649	0.0184388	0.204934	0.139756	0.275949		0.0729449	0.136193
SIM_PI	130	0.988621	0.954381	1.02523	0.0180943	0.205137	0.142019	0.275665		0.0708438	0.133646
SIM_PI	131	0.988642	0.954818	1.02529	0.0179813	0.204322	0.140725	0.27577		0.0704674	0.135045
SIM_PI	132	0.988626	0.953339	1.0252	0.018103	0.203818	0.14	0.273031		0.0718622	0.13303
SIM_PI	133	0.988612	0.954005	1.02521	0.0181998	0.203787	0.140883	0.274337		0.0712034	0.133454
SIM_PI	134	0.988898	0.954452	1.02566	0.0180215	0.20438	0.141311	0.273633		0.0712131	0.132322
SIM_PI	135	0.988636	0.954539	1.02483	0.0179495	0.204561	0.140422	0.274439		0.0702939	0.134017
SIM_PI	136	0.988365	0.954502	1.02483	0.0177933	0.204217	0.140433	0.273416		0.0703246	0.132984
SIM_PI	137	0.988421	0.955081	1.02471	0.0177513	0.204728	0.141133	0.274227		0.0696342	0.133094
SIM_PI	138	0.989073	0.954919	1.02556	0.017879	0.205357	0.142292	0.274927		0.0706412	0.132635
SIM_PI	139	0.988931	0.955335	1.02449	0.0177903	0.20498	0.142668	0.273787		0.069153	0.131119
SIM_PI	140	0.989047	0.955309	1.02399	0.0176135	0.204955	0.142434	0.272026		0.0686798	0.129592
SIM_PI	141	0.988685	0.956625	1.02457	0.0174236	0.204224	0.13975	0.272889		0.0679448	0.133138
SIM_PI	142	0.988847	0.95602	1.02387	0.0173248	0.205186	0.142093	0.274279		0.0678485	0.132186
SIM_PI	143	0.988691	0.955641	1.02411	0.0175148	0.204691	0.142051	0.272851		0.0684682	0.1308
SIM_PI	144	0.98855	0.955445	1.02383	0.0174809	0.204727	0.143213	0.272603		0.0683842	0.12939
SIM_PI	145	0.988992	0.956068	1.02415	0.0172558	0.204599	0.143652	0.272103		0.0680776	0.128451
SIM_PI	146	0.988621	0.955645	1.02417	0.0172447	0.205365	0.143409	0.273226		0.0685283	0.129818
SIM_PI	147	0.98889	0.956708	1.02455	0.0171303	0.205396	0.143676	0.272621		0.0678424	0.128945
SIM_PI	148	0.988713	0.955331	1.02366	0.0172977	0.204605	0.143124	0.271153		0.0683317	0.128028
SIM_PI	149	0.988369	0.955859	1.0228	0.0169134	0.204716	0.1455	0.271256		0.0669394	0.125756
SIM_PI	150	0.988723	0.956697	1.02339	0.0170052	0.20523	0.144514	0.272408		0.0666959	0.127894
SIM_PI	151	0.988488	0.955858	1.02312	0.0168184	0.204668	0.145166	0.270593		0.0672604	0.125427
SIM_PI	152	0.988531	0.956573	1.02231	0.0168948	0.20463	0.145078	0.270886		0.0657334	0.125808
SIM_PI	153	0.988521	0.956648	1.02326	0.0169957	0.204956	0.145501	0.271017		0.0666094	0.125516
SIM_PI	154	0.988703	0.956558	1.0228	0.0168319	0.204743	0.144247	0.270481		0.0662466	0.126234
SIM_PI	155	0.988491	0.957149	1.02164	0.0165689	0.204967	0.145684	0.270786		0.0644947	0.125102
SIM_PI	156	0.988694	0.9571	1.02247	0.0165093	0.204924	0.146297	0.270074		0.0653685	0.123777
SIM_PI	157	0.988687	0.957494	1.02234	0.0165364	0.204919	0.145567	0.268266		0.0648426	0.122699
SIM_PI	158	0.988661	0.957469	1.02169	0.0164279	0.204431	0.145011	0.270033		0.0642186	0.125022
SIM_PI	159	0.988733	0.957354	1.02205	0.0166297	0.205565	0.145672	0.269067		0.0647012	0.123395
SIM_PI	160	0.988531	0.957352	1.02259	0.0166647	0.205351	0.14684	0.268887		0.0652393	0.122047
SIM_PI	161	0.988373	0.957094	1.02132	0.0163385	0.205059	0.146597	0.268925		0.0642297	0.122327
SIM_PI	162	0.988625	0.956996	1.02206	0.0164907	0.205069	0.146089	0.268959		0.0650625	0.12287
SIM_PI	163	0.988382	0.957293	1.02094	0.0162215	0.205363	0.146811	0.269167		0.0636441	0.122356
SIM_PI	164	0.98867	0.957677	1.02172	0.0161278	0.204852	0.147054	0.268055		0.0640387	0.121001
SIM_PI	165	0.988872	0.958298	1.02143	0.0161315	0.205047	0.146347	0.268943		0.063128	0.122596
SIM_PI	166	0.988587	0.958301	1.02149	0.0160308	0.20502	0.147635	0.268689		0.0631916	0.121054
SIM_PI	167	0.988322	0.958179	1.02043	0.0159573	0.205598	0.147116	0.269012		0.0622496	0.121896
SIM_PI	168	0.988433	0.957806	1.02173	0.0162135	0.205108	0.147739	0.266191		0.06392	0.118451
SIM_PI	169	0.988646	0.957827	1.02134	0.0162172	0.205053	0.147506	0.266391		0.0635177	0.118886
SIM_PI	170	0.98861	0.9587	1.02011	0.0158054	0.20552	0.148187	0.269057		0.0614145	0.12087
SIM_PI	171	0.988861	0.959248	1.02108	0.015812	0.20565	0.14913	0.267644		0.0618314	0.118514
SIM_PI	172	0.98853	0.958356	1.02139	0.0160244	0.204988	0.147398	0.267147		0.063035	0.119749
SIM_PI	173	0.988442	0.957925	1.02074	0.0158901	0.205268	0.149046	0.266123		0.0628127	0.117077
SIM_PI	174	0.98865	0.958693	1.02076	0.0157331	0.205292	0.147942	0.266832		0.0620669	0.11889
SIM_PI	175	0.988472	0.958506	1.0206	0.0156882	0.205356	0.149979	0.266401		0.0620976	0.116422
SIM_PI	176	0.988682	0.9589	1.02029	0.0157015	0.205993	0.150244	0.266144		0.0613915	0.115899
SIM_PI	177	0.988707	0.958851	1.02047	0.0156636	0.205557	0.149967	0.265585		0.0616202	0.115618
SIM_PI	178	0.988481	0.958765	1.02071	0.0157193	0.2049	0.148767	0.265918		0.06195	0.117151
SIM_PI	179	0.988672	0.958539	1.01995	0.0154858	0.205514	0.149364	0.265302		0.0614085	0.115939
SIM_PI	180	0.988715	0.958861	1.02055	0.0156616	0.20524	0.149833	0.26646		0.061686	0.116627
SIM_PI	181	0.988495	0.958778	1.02022	0.0156426	0.205642	0.148994	0.26676		0.0614461	0.117767
SIM_PI	182	0.988703	0.959656	1.01969	0.0153438	0.205541	0.150212	0.264825		0.060035	0.114613
SIM_PI	183	0.988626	0.959463	1.01958	0.0152603	0.20512	0.149353	0.265878		0.060119	0.116525
SIM_PI	184	0.988867	0.959684	1.0197	0.0152056	0.205733	0.149538	0.266549		0.0600184	0.117012
SIM_PI	185	0.988559	0.960054	1.01886	0.0150047	0.20534	0.150603	0.264823		0.0588059	0.11422
SIM_PI	186	0.988608	0.959119	1.01926	0.0151851	0.205648	0.151439	0.265093		0.0601424	0.113654
SIM_PI	187	0.988565	0.959874	1.01955	0.0152955	0.205053	0.150033	0.265101		0.0596767	0.115068
SIM_PI	188	0.988502	0.95932	1.01943	0.0152983	0.205219	0.151381	0.264474		0.0601066	0.113093
SIM_PI	189	0.988918	0.960533	1.01999	0.015146	0.205921	0.151239	0.264448		0.0594579	0.113209
SIM_PI	190	0.988521	0.960011	1.01915	0.0151639	0.205622	0.150427	0.264435		0.0591355	0.114008
SIM_PI	191	0.988658	0.959845	1.01919	0.0150817	0.20555	0.152321	0.264618		0.0593462	0.112298
SIM_PI	192	0.988528	0.960608	1.01901	0.0149214	0.205196	0.151619	0.264502		0.058402	0.112882
SIM_PI	193	0.988536	0.959768	1.01862	0.0150107	0.205478	0.151164	0.263138		0.0588493	0.111974
SIM_PI	194	0.988903	0.960816	1.01915	0.0149044	0.206456	0.15185	0.263454		0.058331	0.111605
SIM_PI	195	0.988413	0.959134	1.01867	0.015036	0.205737	0.151777	0.26486		0.0595385	0.113082
SIM_PI	196	0.988535	0.960504	1.01888	0.014866	0.205202	0.151149	0.263627		0.0583779	0.112478
SIM_PI	197	0.988565	0.960891	1.0185	0.0146647	0.205836	0.151993	0.264967		0.0576095	0.112974
SIM_PI	198	0.98857	0.960069	1.01894	0.0149568	0.205589	0.152883	0.26352		0.0588746	0.110637
SIM_PI	199	0.988814	0.961071	1.01849	0.0147716	0.205817	0.152926	0.263312		0.057422	0.110385
SIM_PI	200	0.988731	0.960957	1.01924	0.0149018	0.205843	0.151564	0.262565		0.0582844	0.111001
SIM_PI	201	0.988632	0.96041	1.01858	0.0146865	0.205547	0.153033	0.262234		0.0581735	0.1092
SIM_PI	202	0.988708	0.96015	1.01812	0.0147036	0.205841	0.15386	0.262962		0.0579684	0.109102
SIM_PI	203	0.988686	0.961659	1.01805	0.0145545	0.205723	0.15226	0.262424		0.056393	0.110164
SIM_PI	204	0.988898	0.960931	1.0195	0.0147751	0.205549	0.152591	0.262442		0.0585667	0.109851
SIM_PI	205	0.988566	0.960921	1.01883	0.0145945	0.205934	0.153691	0.261936		0.0579059	0.108246
SIM_PI	206	0.988412	0.961162	1.01737	0.0144486	0.205414	0.152898	0.26177		0.0562044	0.108871
SIM_PI	207	0.98862	0.961218	1.01809	0.0145171	0.205464	0.153252	0.260962		0.0568744	0.10771
SIM_PI	208	0.988753	0.961001	1.01791	0.0144878	0.205965	0.152796	0.262616		0.0569051	0.10982
SIM_PI	209	0.988773	0.961618	1.01827	0.0145081	0.205728	0.152709	0.26125		0.0566559	0.108541
SIM_PI	210	0.9889	0.961103	1.01814	0.0145691	0.205909	0.153465	0.26232		0.0570411	0.108855
SIM_PI	211	0.988765	0.961125	1.0185	0.0145105	0.206285	0.155026	0.263185		0.0573797	0.10816
SIM_PI	212	0.988477	0.961659	1.01756	0.0142455	0.205126	0.154143	0.260366		0.0559025	0.106223
SIM_PI	213	0.98849	0.960828	1.0171	0.0142553	0.2052	0.154853	0.26022		0.056272	0.105367
SIM_PI	214	0.988576	0.961623	1.01726	0.0142686	0.205533	0.153263	0.261475		0.0556382	0.108212
SIM_PI	215	0.988505	0.961087	1.017	0.0142165	0.206147	0.155419	0.261032		0.0559157	0.105613
SIM_PI	216	0.988754	0.961577	1.01713	0.0141735	0.20584	0.15439	0.261468		0.0555558	0.107079
SIM_PI	217	0.988619	0.961228	1.0174	0.0143468	0.206019	0.155291	0.260734		0.0561763	0.105443
SIM_PI	218	0.988933	0.962207	1.01739	0.0140824	0.206171	0.154379	0.260627		0.0551795	0.106248
SIM_PI	219	0.988528	0.961734	1.01663	0.0140844	0.205833	0.153743	0.262048		0.0548979	0.108305
SIM_PI	220	0.988595	0.961481	1.0174	0.0141257	0.205779	0.154942	0.259726		0.0559139	0.104784
SIM_PI	221	0.988647	0.962379	1.01765	0.0140078	0.206415	0.154478	0.261763		0.0552669	0.107285
SIM_PI	222	0.988402	0.961552	1.0161	0.013902	0.205863	0.155782	0.260235		0.0545448	0.104454
SIM_PI	223	0.988643	0.962472	1.01699	0.013948	0.205703	0.156053	0.259877		0.0545223	0.103825
SIM_PI	224	0.988482	0.962106	1.01639	0.01388	0.205616	0.155653	0.259458		0.0542848	0.103804
SIM_PI	225	0.98868	0.962206	1.01662	0.0138431	0.206075	0.155823	0.259911		0.0544142	0.104088
SIM_PI	226	0.988794	0.962749	1.01617	0.0138225	0.206349	0.15517	0.259498		0.0534179	0.104329
SIM_PI	227	0.988753	0.962881	1.01665	0.013857	0.205538	0.154571	0.259567		0.0537683	0.104996
SIM_PI	228	0.988742	0.962348	1.0168	0.0138539	0.205801	0.156317	0.258601		0.0544481	0.102284
SIM_PI	229	0.988683	0.962745	1.01678	0.0136203	0.20599	0.156222	0.25947		0.054038	0.103248
SIM_PI	230	0.988604	0.96263	1.01635	0.0137333	0.206093	0.15576	0.260845		0.0537189	0.105085
SIM_PI	231	0.988399	0.961899	1.0161	0.013728	0.205707	0.155947	0.26046		0.0541966	0.104513
SIM_PI	232	0.988791	0.962476	1.01639	0.0136496	0.206087	0.156599	0.258813		0.0539152	0.102214
SIM_PI	233	0.988497	0.962851	1.01608	0.0135591	0.205334	0.155946	0.258102		0.053227	0.102157
SIM_PI	234	0.988472	0.962785	1.01556	0.013453	0.205791	0.156774	0.258932		0.0527765	0.102158
SIM_PI	235	0.988557	0.962478	1.01556	0.0134359	0.205964	0.156463	0.259161		0.0530852	0.102697
SIM_PI	236	0.988839	0.963196	1.01606	0.0134782	0.206279	0.157176	0.259099		0.0528601	0.101923
SIM_PI	237	0.988644	0.962504	1.01619	0.0136608	0.206145	0.156925	0.258385		0.053691	0.10146
SIM_PI	238	0.988349	0.962563	1.01554	0.0134981	0.205781	0.15721	0.25858		0.05298	0.10137
SIM_PI	239	0.988825	0.963436	1.01576	0.0133466	0.205788	0.156537	0.258205		0.0523222	0.101668
SIM_PI	240	0.988577	0.962914	1.01566	0.0134451	0.206019	0.156882	0.258035		0.0527408	0.101153
SIM_PI	241	0.988686	0.962731	1.01636	0.0136302	0.20619	0.157724	0.258888		0.0536302	0.101164
SIM_PI	242	0.988627	0.963045	1.01508	0.0133272	0.206237	0.158041	0.258633		0.052033	0.100592
SIM_PI	243	0.988781	0.963173	1.01572	0.0133875	0.206601	0.157744	0.257778		0.0525512	0.100034
SIM_PI	244	0.988655	0.963173	1.01612	0.0134726	0.206409	0.157356	0.258564		0.0529442	0.101208
SIM_PI	245	0.988687	0.963196	1.01508	0.0132101	0.206301	0.157437	0.256979		0.0518824	0.0995419
SIM_PI	246	0.988678	0.963419	1.01578	0.0133281	0.206157	0.158091	0.257088		0.0523657	0.0989975
SIM_PI	247	0.988595	0.963244	1.01532	0.0130666	0.20597	0.15707	0.256989		0.0520739	0.0999198
SIM_PI	248	0.98882	0.963694	1.01506	0.0131484	0.206055	0.157468	0.257111		0.0513686	0.0996429
SIM_PI	249	0.988708	0.963633	1.01532	0.0130878	0.206004	0.15714	0.257479		0.0516903	0.100339
SIM_PI	250	0.988634	0.963977	1.01448	0.0129519	0.205907	0.157885	0.25689		0.0505067	0.099004
SIM_PI	251	0.98864	0.96362	1.01457	0.0130062	0.206068	0.158934	0.256891		0.0509512	0.0979573
SIM_PI	252	0.988726	0.963515	1.01563	0.0132086	0.206296	0.158655	0.256987		0.0521116	0.0983315
SIM_PI	253	0.988779	0.964477	1.01537	0.0129083	0.206194	0.158289	0.257735		0.0508955	0.0994464
SIM_PI	254	0.988792	0.963329	1.01526	0.0130177	0.206487	0.158742	0.258216		0.0519305	0.0994734
SIM_PI	255	0.988603	0.963979	1.01509	0.0130788	0.206095	0.158568	0.258256		0.0511142	0.0996874
SIM_PI	256	0.988729	0.964096	1.01531	0.0130661	0.206317	0.157973	0.257146		0.0512177	0.0991732
SIM_PI	257	0.988639	0.963663	1.0155	0.0130206	0.20626	0.158429	0.257819		0.0518393	0.0993895
SIM_PI	258	0.988632	0.963963	1.0149	0.0128992	0.205752	0.158445	0.255641		0.0509363	0.0971966
SIM_PI	259	0.988706	0.964101	1.01481	0.012874	0.20605	0.158684	0.256689		0.050705	0.0980047
SIM_PI	260	0.988834	0.964516	1.01511	0.0128943	0.206152	0.158293	0.25569		0.0505978	0.0973966
SIM_PI	261	0.988594	0.963745	1.01443	0.0129157	0.206374	0.160252	0.257089		0.0506887	0.0968364
SIM_PI	262	0.988533	0.963888	1.01421	0.0127581	0.206242	0.159938	0.255422		0.0503198	0.0954834
SIM_PI	263	0.988782	0.964588	1.01428	0.0127827	0.206075	0.159662	0.25599		0.0496934	0.0963287
SIM_PI	264	0.988543	0.96474	1.01398	0.0127522	0.206247	0.159493	0.255986		0.0492448	0.0964926
SIM_PI	265	0.988829	0.964164	1.01501	0.0129707	0.206487	0.1597	0.2566		0.0508459	0.0968993
SIM_PI	266	0.98862	0.96444	1.01417	0.0125969	0.206577	0.160497	0.256881		0.0497309	0.0963836
SIM_PI	267	0.988556	0.964227	1.01436	0.0126467	0.206165	0.160296	0.255756		0.0501304	0.0954602
SIM_PI	268	0.988764	0.964647	1.01448	0.0126734	0.206455	0.160045	0.25627		0.0498365	0.0962252
SIM_PI	269	0.988678	0.964066	1.0142	0.0128478	0.206182	0.159279	0.256763		0.0501376	0.0974841
SIM_PI	270	0.988775	0.964037	1.01369	0.0126408	0.206561	0.16029	0.255589		0.0496553	0.0952991
SIM_PI	271	0.988751	0.964875	1.01419	0.0125905	0.206176	0.159876	0.253827		0.0493098	0.0939516
SIM_PI	272	0.988591	0.964603	1.01421	0.0127186	0.206089	0.160208	0.254901		0.049607	0.0946923
SIM_PI	273	0.988532	0.964677	1.01413	0.0125416	0.205906	0.160508	0.254888		0.0494532	0.0943794
SIM_PI	274	0.988847	0.964909	1.01379	0.0124515	0.206298	0.160084	0.254739		0.0488797	0.0946556
SIM_PI	275	0.988626	0.965195	1.01397	0.0125063	0.206309	0.160092	0.25527		0.0487735	0.0951785
SIM_PI	276	0.988563	0.964432	1.01385	0.0126471	0.206083	0.159773	0.254252		0.0494171	0.0944789
SIM_PI	277	0.988674	0.964895	1.01383	0.0125007	0.206377	0.160689	0.255314		0.0489332	0.0946256
SIM_PI	278	0.988725	0.964497	1.01369	0.0124879	0.206275	0.160073	0.254144		0.04919	0.0940709
SIM_PI	279	0.988549	0.96431	1.01331	0.0124523	0.20632	0.160536	0.254494		0.049004	0.0939579
SIM_PI	280	0.989038	0.96522	1.01385	0.0124021	0.206713	0.161646	0.254095		0.0486338	0.0924484
SIM_PI	281	0.988742	0.964962	1.01391	0.0124326	0.206732	0.16188	0.255755		0.0489522	0.0938746
SIM_PI	282	0.988858	0.964907	1.01391	0.0124172	0.206377	0.161384	0.254486		0.0490022	0.0931026
SIM_PI	283	0.988765	0.964728	1.01396	0.0124477	0.206553	0.161875	0.254376		0.0492297	0.092501
SIM_PI	284	0.988599	0.965	1.01319	0.0122065	0.20607	0.160851	0.254513		0.0481913	0.0936618
SIM_PI	285	0.988652	0.965331	1.01335	0.0123633	0.206139	0.160829	0.253861		0.0480164	0.093032
SIM_PI	286	0.989004	0.965142	1.01377	0.0123399	0.206402	0.161559	0.254718		0.0486311	0.0931592
SIM_PI	287	0.988637	0.965146	1.01316	0.0123454	0.206197	0.161462	0.253629		0.0480151	0.0921671
SIM_PI	288	0.988517	0.965466	1.0131	0.0121135	0.205875	0.160888	0.252689		0.0476345	0.0918016
SIM_PI	289	0.988772	0.964941	1.0129	0.0121783	0.20634	0.16245	0.253074		0.0479595	0.0906247
SIM_PI	290	0.988752	0.965341	1.01358	0.0122963	0.206352	0.161128	0.253199		0.0482388	0.0920711
SIM_PI	291	0.988532	0.964795	1.01331	0.0122814	0.206092	0.161197	0.252753		0.0485147	0.0915559
SIM_PI	292	0.988456	0.965063	1.01263	0.0122129	0.206055	0.162081	0.252448		0.0475626	0.090367
SIM_PI	293	0.988652	0.965229	1.01331	0.0123048	0.206256	0.161865	0.253791		0.0480797	0.0919263
SIM_PI	294	0.988807	0.965363	1.01303	0.0121377	0.206528	0.161494	0.254702		0.0476701	0.093208
SIM_PI	295	0.988594	0.965362	1.01317	0.0121216	0.206762	0.162626	0.25261		0.0478071	0.0899838
SIM_PI	296	0.988445	0.965394	1.0127	0.0121063	0.206302	0.161932	0.252786		0.0473049	0.0908539
SIM_PI	297	0.988736	0.965225	1.0132	0.0120501	0.206318	0.161806	0.2532		0.0479789	0.0913943
SIM_PI	298	0.988603	0.96571	1.01257	0.0120266	0.206506	0.162728	0.25362		0.0468635	0.0908926
SIM_PI	299	0.98834	0.965152	1.01307	0.0120546	0.206294	0.162435	0.251955		0.0479146	0.0895204
SIM_PI	300	0.988695	0.965904	1.01248	0.0119092	0.206636	0.162591	0.251624		0.0465734	0.0890331
SIM_PI	301	0.98867	0.965862	1.013	0.0119265	0.206635	0.162888	0.253827		0.0471373	0.0909394
SIM_PI	302	0.988668	0.965483	1.01318	0.0120363	0.206435	0.162555	0.253667		0.0476926	0.0911121
SIM_PI	303	0.98874	0.965929	1.01283	0.011967	0.206635	0.163307	0.253856		0.0469011	0.0905492
SIM_PI	304	0.988289	0.965423	1.01219	0.0119784	0.206324	0.163367	0.252084		0.0467708	0.0887161
SIM_PI	305	0.98875	0.965804	1.01275	0.0119443	0.206548	0.163838	0.252642		0.046943	0.0888043
SIM_PI	306	0.988764	0.966238	1.0124	0.0118788	0.206773	0.163306	0.252894		0.0461638	0.0895879
SIM_PI	307	0.988622	0.966333	1.01263	0.011834	0.206588	0.163595	0.252517		0.0462926	0.0889221
SIM_PI	308	0.988555	0.965482	1.01222	0.0118757	0.20637	0.162641	0.252261		0.0467431	0.08962
SIM_PI	309	0.988589	0.965104	1.0123	0.0118538	0.206483	0.163114	0.252082		0.0471917	0.0889687
SIM_PI	310	0.988876	0.966555	1.01343	0.0117765	0.206396	0.163104	0.252874		0.0468778	0.0897699
SIM_PI	311	0.988678	0.96613	1.01192	0.0116672	0.206781	0.164502	0.251837		0.0457882	0.087335
SIM_PI	312	0.9885	0.965821	1.01208	0.0117299	0.20621	0.162844	0.252127		0.0462621	0.0892827
SIM_PI	313	0.988583	0.965829	1.01264	0.0118717	0.206659	0.16453	0.253068		0.0468068	0.0885383
SIM_PI	314	0.988764	0.966604	1.01183	0.0116331	0.206738	0.164006	0.252467		0.045222	0.088461
SIM_PI	315	0.98854	0.965478	1.01249	0.0119029	0.206406	0.163006	0.251663		0.0470087	0.0886562
SIM_PI	316	0.988716	0.966187	1.01269	0.0117126	0.206574	0.163022	0.251599		0.0465066	0.0885773
SIM_PI	317	0.988626	0.965842	1.01266	0.011733	0.206588	0.163339	0.252543		0.0468156	0.0892041
SIM_PI	318	0.988774	0.966266	1.01211	0.0116763	0.206454	0.164251	0.251699		0.0458488	0.0874483
SIM_PI	319	0.988495	0.966258	1.01194	0.0116691	0.206329	0.163142	0.25229		0.045681	0.0891481
SIM_PI	320	0.988646	0.965995	1.01206	0.011796	0.20631	0.16329	0.251657		0.0460628	0.0883663
SIM_PI	321	0.988449	0.966526	1.01109	0.0114668	0.206393	0.164043	0.250607		0.044567	0.0865642
SIM_PI	322	0.988733	0.966316	1.01197	0.0115281	0.206405	0.16468	0.251128		0.0456564	0.0864481
SIM_PI	323	0.988656	0.966273	1.01198	0.0115139	0.206622	0.16442	0.250871		0.0457022	0.0864507
SIM_PI	324	0.98854	0.966461	1.01172	0.0115502	0.206589	0.164991	0.250331		0.0452637	0.0853403
SIM_PI	325	0.988604	0.966664	1.01193	0.0115067	0.206435	0.163199	0.251995		0.0452628	0.0887965
SIM_PI	326	0.988793	0.966866	1.012	0.0115126	0.206857	0.16459	0.251899		0.045137	0.0873094
SIM_PI	327	0.988878	0.966547	1.01274	0.0116134	0.206722	0.163822	0.251246		0.0461896	0.0874237
SIM_PI	328	0.988637	0.966915	1.0118	0.0114517	0.206715	0.16389	0.251541		0.0448889	0.0876506
SIM_PI	329	0.98884	0.966799	1.01178	0.0114302	0.206809	0.164812	0.251456		0.044984	0.0866442
SIM_PI	330	0.988586	0.966515	1.01131	0.0114618	0.206421	0.163393	0.251662		0.0447915	0.0882685
SIM_PI	331	0.988694	0.966808	1.01188	0.011475	0.206542	0.164315	0.251602		0.0450699	0.0872866
SIM_PI	332	0.988527	0.966444	1.01122	0.0113366	0.206532	0.164306	0.249764		0.044776	0.0854573
SIM_PI	333	0.988644	0.96697	1.01105	0.0113378	0.206799	0.16477	0.250627		0.0440769	0.0858573
SIM_PI	334	0.989019	0.96745	1.01203	0.0113473	0.206893	0.164435	0.251423		0.0445836	0.0869881
SIM_PI	335	0.988606	0.967	1.01149	0.0113211	0.206664	0.165531	0.250867		0.0444872	0.0853364
SIM_PI	336	0.988632	0.967178	1.01144	0.011305	0.206247	0.164872	0.250332		0.0442663	0.0854598
SIM_PI	337	0.98864	0.96689	1.01145	0.0114475	0.206621	0.165888	0.250586		0.0445594	0.0846977
SIM_PI	338	0.988812	0.966989	1.01155	0.0114707	0.206813	0.165045	0.251042		0.0445567	0.085997
SIM_PI	339	0.988687	0.967469	1.01152	0.0111969	0.206757	0.164769	0.250211		0.0440508	0.085441
SIM_PI	340	0.988689	0.966814	1.01137	0.0112082	0.206482	0.165152	0.248768		0.0445553	0.0836163
SIM_PI	341	0.98861	0.966782	1.01145	0.0113566	0.207181	0.165287	0.250956		0.0446647	0.0856691
SIM_PI	342	0.988592	0.966816	1.01141	0.0113434	0.206428	0.164873	0.24986		0.0445947	0.0849872
SIM_PI	343	0.988773	0.967499	1.01168	0.0112797	0.206825	0.164699	0.251134		0.044183	0.0864349
SIM_PI	344	0.988815	0.966518	1.01125	0.0114022	0.207027	0.165781	0.250656		0.0447317	0.0848755
SIM_PI	345	0.988572	0.966987	1.0114	0.011207	0.206643	0.16544	0.24971		0.044409	0.0842703
SIM_PI	346	0.988659	0.967156	1.01151	0.0112188	0.20657	0.16545	0.248979		0.0443564	0.0835289
SIM_PI	347	0.988765	0.967968	1.0111	0.0110076	0.206645	0.166583	0.248924		0.0431289	0.0823412
SIM_PI	348	0.9888	0.967251	1.01102	0.0111487	0.206716	0.165678	0.249249		0.0437723	0.0835706
SIM_PI	349	0.988431	0.966511	1.01081	0.0110864	0.206262	0.165983	0.248305		0.0442947	0.0823226
SIM_PI	350	0.988723	0.96752	1.01085	0.0109763	0.206634	0.165541	0.250403		0.0433315	0.084862
SIM_PI	351	0.98885	0.967659	1.01115	0.0111691	0.207037	0.165698	0.250288		0.0434888	0.0845904
SIM_PI	352	0.988482	0.967285	1.01075	0.0110542	0.206467	0.165932	0.249545		0.0434641	0.0836123
SIM_PI	353	0.98851	0.967454	1.01076	0.0110434	0.206207	0.165539	0.249046		0.0433099	0.0835072
SIM_PI	354	0.988458	0.967254	1.01084	0.0111928	0.206818	0.166078	0.250174		0.0435814	0.0840957
SIM_PI	355	0.988626	0.967731	1.01086	0.0110366	0.207072	0.166103	0.25		0.0431315	0.0838972
SIM_PI	356	0.988552	0.967477	1.01078	0.0109985	0.206488	0.165575	0.249375		0.0433043	0.0837998
SIM_PI	357	0.988769	0.967755	1.01129	0.0110764	0.206803	0.166192	0.249056		0.0435357	0.0828643
SIM_PI	358	0.988673	0.967447	1.01061	0.0109396	0.206738	0.166371	0.249034		0.0431608	0.0826637
SIM_PI	359	0.988636	0.967408	1.0106	0.0110174	0.206666	0.166174	0.249275		0.0431946	0.0831011
SIM_PI	360	0.988767	0.967733	1.01134	0.0109494	0.206707	0.165543	0.248811		0.0436025	0.0832683
SIM_PI	361	0.988682	0.967753	1.01105	0.0109973	0.206806	0.16646	0.250114		0.0433015	0.0836543
SIM_PI	362	0.988619	0.967238	1.00966	0.0108335	0.206722	0.166999	0.249187		0.0424231	0.0821879
SIM_PI	363	0.988525	0.967279	1.01009	0.0109026	0.206359	0.165495	0.249802		0.042808	0.084307
SIM_PI	364	0.988799	0.967778	1.01087	0.0109414	0.207197	0.167127	0.249262		0.0430935	0.0821351
SIM_PI	365	0.988834	0.968074	1.01101	0.0109465	0.206628	0.167077	0.248288		0.0429332	0.0812111
SIM_PI	366	0.988733	0.967455	1.01107	0.0110151	0.206766	0.167445	0.247787		0.0436109	0.0803412
SIM_PI	367	0.988864	0.967814	1.01054	0.0108062	0.206722	0.167026	0.248533		0.0427228	0.0815067
SIM_PI	368	0.988697	0.967817	1.01069	0.0109008	0.206772	0.166998	0.248799		0.0428724	0.0818004
SIM_PI	369	0.988675	0.967547	1.01066	0.0108744	0.206512	0.166113	0.248244		0.0431175	0.0821315
SIM_PI	370	0.988437	0.967547	1.01021	0.010789	0.206242	0.165963	0.248432		0.0426669	0.0824685
SIM_PI	371	0.988451	0.967693	1.01015	0.010786	0.206529	0.166746	0.247796		0.0424532	0.0810502
SIM_PI	372	0.98879	0.968275	1.01034	0.0106651	0.207036	0.167628	0.248477		0.04207	0.0808491
SIM_PI	373	0.988614	0.967985	1.01068	0.0107511	0.206871	0.16674	0.24962		0.0426929	0.0828803
SIM_PI	374	0.988674	0.967736	1.01066	0.0109173	0.206635	0.166044	0.248069		0.0429198	0.0820249
SIM_PI	375	0.98867	0.968164	1.01037	0.0107955	0.206951	0.166692	0.249169		0.0422019	0.0824767
SIM_PI	376	0.988583	0.967772	1.01021	0.0107718	0.206718	0.167144	0.249047		0.0424369	0.0819034
SIM_PI	377	0.988687	0.968237	1.0103	0.0107785	0.206636	0.166905	0.247833		0.0420676	0.0809281
SIM_PI	378	0.988741	0.968245	1.01011	0.0106783	0.206925	0.167082	0.24886		0.0418675	0.0817772
SIM_PI	379	0.98882	0.967722	1.01009	0.0107511	0.206411	0.167728	0.247567		0.0423641	0.0798386
SIM_PI	380	0.98873	0.968135	1.01028	0.010689	0.206994	0.168439	0.246876		0.0421411	0.0784373
SIM_PI	381	0.988625	0.968084	1.00946	0.0105803	0.206896	0.167542	0.248329		0.0413717	0.0807866
SIM_PI	382	0.988657	0.968414	1.00982	0.0106119	0.206733	0.167798	0.247401		0.0414007	0.0796029
SIM_PI	383	0.988778	0.968526	1.00956	0.0104883	0.207095	0.167865	0.248385		0.0410364	0.0805203
SIM_PI	384	0.98861	0.968163	1.00973	0.01054	0.206886	0.167745	0.24817		0.04157	0.0804252
SIM_PI	385	0.9886	0.968197	1.00957	0.0105526	0.206769	0.167028	0.248215		0.0413729	0.081187
SIM_PI	386	0.988625	0.968373	1.00949	0.0105417	0.206628	0.168053	0.246424		0.0411123	0.0783711
SIM_PI	387	0.988773	0.968314	1.01015	0.0107614	0.207144	0.168606	0.248077		0.0418322	0.079471
SIM_PI	388	0.988596	0.9686	1.00961	0.0105332	0.206708	0.167616	0.247828		0.0410082	0.080212
SIM_PI	389	0.988843	0.96869	1.00996	0.0105428	0.20754	0.169049	0.248123		0.041265	0.0790738
SIM_PI	390	0.988777	0.968229	1.00964	0.0105955	0.206862	0.168302	0.247668		0.0414153	0.079366
SIM_PI	391	0.988552	0.967928	1.00998	0.0107346	0.206821	0.167886	0.247736		0.0420484	0.07985
SIM_PI	392	0.988361	0.967893	1.00928	0.0105366	0.206374	0.168177	0.246648		0.041383	0.0784714
SIM_PI	393	0.988758	0.968703	1.00994	0.010486	0.206893	0.168374	0.2482		0.0412377	0.0798264
SIM_PI	394	0.988709	0.968636	1.00979	0.0105129	0.206868	0.168678	0.246654		0.0411542	0.0779762
SIM_PI	395	0.988606	0.968278	1.00977	0.0104482	0.206618	0.16831	0.247361		0.041488	0.0790512
SIM_PI	396	0.988513	0.968429	1.00931	0.0103668	0.206861	0.168429	0.247026		0.0408852	0.0785971
SIM_PI	397	0.988668	0.968787	1.00934	0.0103183	0.206576	0.168381	0.247454		0.0405531	0.0790729
SIM_PI	398	0.988823	0.968623	1.00998	0.0105539	0.207057	0.167497	0.247802		0.0413565	0.0803047
SIM_PI	399	0.988738	0.969157	1.00932	0.0103089	0.206716	0.169055	0.24728		0.0401594	0.0782247
SIM_PI	400	0.988468	0.968699	1.0091	0.0101425	0.206759	0.168039	0.247215		0.0404058	0.0791758
SIM_PI	401	0.988614	0.968637	1.00961	0.0103811	0.207052	0.168529	0.247006		0.0409748	0.0784772
SIM_PI	402	0.988612	0.96848	1.00903	0.0103623	0.206823	0.169231	0.247352		0.0405541	0.0781214
SIM_PI	403	0.988693	0.968548	1.00966	0.0103721	0.206967	0.16796	0.245822		0.0411156	0.0778618
SIM_PI	404	0.988489	0.968536	1.00914	0.0102949	0.206574	0.168371	0.247947		0.0406044	0.0795767
SIM_PI	405	0.988719	0.968461	1.00985	0.0104281	0.206738	0.168592	0.246636		0.0413928	0.0780448
SIM_PI	406	0.988757	0.968925	1.00992	0.0103719	0.206878	0.169644	0.24783		0.0409983	0.0781857
SIM_PI	407	0.988601	0.9685	1.00934	0.0104273	0.206873	0.168718	0.247138		0.0408398	0.07842
SIM_PI	408	0.988796	0.968666	1.00957	0.0104339	0.207056	0.168863	0.248041		0.0409036	0.0791778
SIM_PI	409	0.988568	0.968575	1.00916	0.010355	0.206949	0.168223	0.247129		0.0405873	0.0789065
SIM_PI	410	0.988606	0.968943	1.00915	0.0102602	0.206972	0.169671	0.247132		0.0402082	0.0774609
SIM_PI	411	0.988724	0.969236	1.0091	0.0102101	0.206977	0.168177	0.246344		0.0398653	0.0781675
SIM_PI	412	0.988601	0.968825	1.00947	0.0102952	0.206579	0.168687	0.245633		0.0406431	0.0769463
SIM_PI	413	0.988708	0.969699	1.00921	0.0100632	0.20692	0.169311	0.24631		0.0395121	0.0769984
SIM_PI	414	0.988484	0.968546	1.00895	0.0102227	0.206681	0.16862	0.245842		0.0404073	0.0772229
SIM_PI	415	0.988756	0.968903	1.00951	0.0102379	0.207057	0.170132	0.247077		0.0406087	0.076945
SIM_PI	416	0.988605	0.968746	1.00925	0.0103057	0.206788	0.169294	0.245809		0.0405001	0.0765143
SIM_PI	417	0.98866	0.9689	1.00931	0.0102928	0.206767	0.168567	0.245973		0.0404118	0.0774062
SIM_PI	418	0.988656	0.969278	1.00887	0.0101955	0.206823	0.169725	0.246394		0.0395964	0.0766687
SIM_PI	419	0.98869	0.96874	1.00915	0.0102595	0.207042	0.16964	0.246839		0.0404098	0.0771993
SIM_PI	420	0.988582	0.968813	1.0092	0.0102818	0.206598	0.169576	0.245274		0.0403845	0.0756972
SIM_PI	421	0.988805	0.969107	1.00949	0.0102104	0.206594	0.16949	0.245439		0.0403849	0.075949
SIM_PI	422	0.988682	0.969339	1.00876	0.0101088	0.207179	0.169302	0.245914		0.039418	0.0766125
SIM_PI	423	0.988581	0.969176	1.00898	0.0101665	0.206966	0.169801	0.245248		0.0398011	0.0754475
SIM_PI	424	0.988531	0.96874	1.00874	0.0102098	0.207041	0.169056	0.246159		0.0399987	0.0771033
SIM_PI	425	0.988547	0.969345	1.00842	0.00997197	0.206943	0.170152	0.24453		0.0390794	0.0743782
r2t_995	2	1.00008	0.8465	1.1785	0.0819558	0.0570719	0.00146802	0.222		0.332	0.220532
r2t_995	3	1.00077	0.875667	1.155	0.0675874	0.072817	0.0094731	0.245749		0.279333	0.236276
r2t_995	4	1.00113	0.89075	1.13775	0.0591603	0.0828182	0.0166283	0.254893		0.247	0.238265
r2t_995	5	0.999843	0.902	1.12049	0.051961	0.0865851	0.0223164	0.24701		0.218492	0.224694
r2t_995	6	0.999544	0.911833	1.10917	0.047414	0.0907756	0.0270525	0.245762		0.197333	0.218709
r2t_995	7	0.999671	0.917	1.09857	0.0442967	0.093068	0.0304291	0.240525		0.181571	0.210096
r2t_995	8	1.00032	0.920251	1.09512	0.0417143	0.0961528	0.03363	0.261036		0.174874	0.227406
r2t_995	9	0.999754	0.927341	1.08767	0.0389686	0.0974042	0.0368092	0.256794		0.160326	0.219985
r2t_995	10	1.00044	0.931498	1.08208	0.0368052	0.0991209	0.0394967	0.245623		0.150579	0.206126
r2t_995	11	1.00025	0.93278	1.07645	0.0351565	0.0999471	0.0410815	0.241238		0.143675	0.200157
r2t_995	12	0.999991	0.936062	1.07382	0.0337798	0.101911	0.0435253	0.236616		0.137761	0.19309
r2t_995	13	0.999507	0.939444	1.0692	0.0321175	0.102349	0.0446526	0.229587		0.129759	0.184934
r2t_995	14	1.00002	0.94242	1.06716	0.030947	0.103735	0.0478433	0.225907		0.124742	0.178064
r2t_995	15	1.00043	0.944924	1.06523	0.0300767	0.103889	0.0492849	0.22158		0.120306	0.172295
r2t_995	16	0.999705	0.945824	1.06013	0.028508	0.104157	0.0496767	0.216458		0.114305	0.166781
r2t_995	17	0.999973	0.946703	1.0611	0.0283676	0.105954	0.0508974	0.213303		0.114395	0.162405
r2t_995	18	0.999911	0.948048	1.05937	0.0274599	0.105242	0.0518319	0.20997		0.111324	0.158138
r2t_995	19	0.999473	0.949549	1.0561	0.0267977	0.106162	0.052415	0.207266		0.106549	0.154851
r2t_995	20	0.999836	0.951432	1.05585	0.0262173	0.106176	0.0544899	0.205104		0.104421	0.150614
r2t_995	21	1.00023	0.952578	1.05235	0.0252621	0.107038	0.0546248	0.201461		0.0997722	0.146836
r2t_995	22	0.999902	0.954185	1.05122	0.0244873	0.106844	0.0562457	0.200925		0.0970376	0.14468
r2t_995	23	1.00011	0.954244	1.052	0.0244995	0.108144	0.0571742	0.200765		0.0977557	0.143591
r2t_995	24	0.999976	0.956089	1.05021	0.0237519	0.107297	0.0577826	0.196493		0.0941195	0.138711
r2t_995	25	0.999942	0.956294	1.04759	0.0231004	0.108317	0.0592264	0.193213		0.0912927	0.133987
r2t_995	26	0.999831	0.956104	1.04821	0.0229593	0.108322	0.0601172	0.192396		0.0921105	0.132279
r2t_995	27	0.99991	0.958022	1.04583	0.022139	0.108566	0.0602398	0.191435		0.0878068	0.131195
r2t_995	28	0.999978	0.958427	1.04544	0.0219475	0.109029	0.0604414	0.190102		0.0870172	0.129661
r2t_995	29	1.00019	0.959485	1.04445	0.0214515	0.109185	0.0618886	0.188113		0.0849616	0.126224
r2t_995	30	0.999825	0.959861	1.04442	0.0212016	0.109235	0.0624759	0.187202		0.0845574	0.124726
r2t_995	31	1.00021	0.961317	1.04327	0.0207231	0.109506	0.062656	0.186844		0.0819536	0.124188
r2t_995	32	1.00051	0.961983	1.04319	0.0206298	0.110041	0.0634304	0.185542		0.0812089	0.122111
r2t_995	33	0.999936	0.962518	1.04101	0.0200982	0.109821	0.0637513	0.183492		0.078496	0.119741
r2t_995	34	0.999958	0.962518	1.0397	0.0195405	0.1098	0.0649065	0.184109		0.0771862	0.119202
r2t_995	35	0.999993	0.962875	1.04092	0.0196784	0.110505	0.0656331	0.183426		0.0780435	0.117793
r2t_995	36	0.999604	0.962231	1.0393	0.019554	0.110501	0.0657731	0.180138		0.0770719	0.114365
r2t_995	37	1.0002	0.964346	1.04045	0.0190951	0.110577	0.0654909	0.181208		0.0761016	0.115717
r2t_995	38	1.00018	0.965083	1.03931	0.0188104	0.110565	0.0662784	0.179588		0.0742227	0.113309
r2t_995	39	1.00005	0.964287	1.03887	0.018772	0.110427	0.0662436	0.179178		0.0745816	0.112934
r2t_995	40	1.00011	0.964888	1.03764	0.0185859	0.111239	0.0677466	0.177793		0.0727498	0.110046
r2t_995	41	1.00031	0.9655	1.0384	0.0182567	0.11106	0.0676244	0.177791		0.0728949	0.110167
r2t_995	42	1.00034	0.96651	1.03676	0.0178821	0.111107	0.0686552	0.174795		0.0702485	0.10614
r2t_995	43	0.999959	0.966014	1.03784	0.0178926	0.111647	0.0675799	0.177643		0.0718236	0.110063
r2t_995	44	0.999995	0.967083	1.0356	0.0172817	0.110992	0.0682713	0.175081		0.0685197	0.10681
r2t_995	45	0.99997	0.96739	1.03626	0.0172744	0.111512	0.0690119	0.174854		0.0688663	0.105842
r2t_995	46	0.999725	0.966723	1.03528	0.0173702	0.111499	0.0692328	0.1752		0.0685608	0.105967
r2t_995	47	0.999623	0.967588	1.03409	0.0169906	0.111293	0.0700897	0.173793		0.0664995	0.103703
r2t_995	48	0.999902	0.968085	1.03375	0.016778	0.111746	0.0706667	0.172975		0.0656633	0.102308
r2t_995	49	1.00015	0.968834	1.03418	0.0166187	0.111739	0.0702179	0.173757		0.0653477	0.10354
r2t_995	50	0.999986	0.968382	1.03365	0.016469	0.111719	0.070442	0.173414		0.0652663	0.102972
r2t_995	51	0.99994	0.969049	1.03279	0.0160519	0.111659	0.0705498	0.171803		0.0637367	0.101253
r2t_995	52	1.00009	0.969888	1.03277	0.0159664	0.112134	0.0719107	0.172541		0.062877	0.100631
r2t_995	53	0.999657	0.969793	1.03215	0.0158266	0.112071	0.0717289	0.171189		0.0623566	0.0994598
r2t_995	54	0.999862	0.970238	1.03188	0.0155533	0.111679	0.0719998	0.170031		0.0616372	0.0980309
r2t_995	55	0.999848	0.970248	1.03118	0.0154293	0.111821	0.0726592	0.168741		0.0609358	0.0960817
r2t_995	56	1	0.970894	1.03131	0.015428	0.112613	0.0728991	0.17021		0.0604133	0.0973108
r2t_995	57	1.00003	0.971132	1.03125	0.0153769	0.112046	0.0724566	0.167587		0.0601179	0.0951301
r2t_995	58	1.00001	0.97137	1.03151	0.0151426	0.112525	0.0734758	0.168162		0.0601373	0.094686
r2t_995	59	0.999841	0.97073	1.03082	0.0153418	0.112436	0.0738064	0.168262		0.0600932	0.094456
r2t_995	60	1.0003	0.971942	1.03042	0.0148656	0.11266	0.073946	0.168453		0.0584763	0.0945066
r2t_995	61	0.999992	0.971823	1.03033	0.0147895	0.112457	0.0740014	0.16701		0.0585031	0.0930086
r2t_995	62	0.999818	0.972031	1.0308	0.0148612	0.112798	0.0744934	0.167034		0.0587672	0.092541
r2t_995	63	0.999916	0.972099	1.02934	0.0145456	0.112272	0.0740071	0.165759		0.0572379	0.0917521
r2t_995	64	1.00021	0.972746	1.0295	0.0143868	0.113225	0.0747861	0.165364		0.0567501	0.0905776
r2t_995	65	1.00003	0.972581	1.02966	0.0145124	0.112551	0.0748564	0.16534		0.0570797	0.0904834
r2t_995	66	1.00001	0.973013	1.02943	0.014235	0.112966	0.0758738	0.166549		0.056418	0.0906749
r2t_995	67	1.0001	0.973416	1.02953	0.0142714	0.113231	0.0761746	0.165946		0.0561094	0.0897715
r2t_995	68	1.00001	0.972887	1.02913	0.0142134	0.113101	0.0758041	0.165745		0.0562418	0.0899412
r2t_995	69	1.00009	0.972905	1.0281	0.0140683	0.113162	0.0766247	0.164047		0.0551943	0.0874227
r2t_995	70	1.00027	0.974006	1.02808	0.0138472	0.113164	0.076515	0.164416		0.0540687	0.0879012
r2t_995	71	1.00012	0.973776	1.02806	0.0137873	0.112837	0.076501	0.162794		0.0542875	0.0862928
r2t_995	72	0.999879	0.973768	1.02766	0.0136222	0.112832	0.0767006	0.1645		0.053897	0.0877995
r2t_995	73	1.00001	0.974272	1.02847	0.0137429	0.1134	0.0771965	0.163369		0.0541954	0.0861724
r2t_995	74	1.00005	0.974326	1.02785	0.0135318	0.112983	0.0763779	0.162607		0.0535198	0.086229
r2t_995	75	0.999993	0.974386	1.02732	0.0134092	0.113254	0.0776246	0.162204		0.0529304	0.0845793
r2t_995	76	0.999814	0.974491	1.02647	0.0132203	0.113314	0.0776005	0.162257		0.0519819	0.0846566
r2t_995	77	1.00018	0.974775	1.02742	0.0134246	0.113652	0.0778265	0.163194		0.0526467	0.0853673
r2t_995	78	0.999934	0.97552	1.02707	0.013237	0.113131	0.0774878	0.162047		0.0515464	0.0845592
r2t_995	79	1.00006	0.975254	1.02662	0.0131983	0.113365	0.0786932	0.16086		0.0513643	0.0821664
r2t_995	80	1.00008	0.975703	1.02634	0.0129463	0.113253	0.0775904	0.161471		0.0506316	0.0838807
r2t_995	81	1.00002	0.975357	1.02673	0.0130149	0.113121	0.0778756	0.161065		0.0513712	0.0831889
r2t_995	82	1.0001	0.975571	1.02622	0.0128494	0.113361	0.0780602	0.161765		0.0506502	0.0837049
r2t_995	83	1.00025	0.976272	1.02572	0.0126472	0.113589	0.0788485	0.16124		0.0494441	0.0823918
r2t_995	84	1.00024	0.976081	1.0257	0.0127465	0.113903	0.0794715	0.161836		0.0496203	0.0823647
r2t_995	85	0.999822	0.975764	1.02511	0.0125909	0.113375	0.0787538	0.159079		0.0493442	0.0803251
r2t_995	86	1.00025	0.976581	1.02563	0.0126393	0.113613	0.0794914	0.159538		0.0490504	0.0800468
r2t_995	87	1.00001	0.976609	1.02469	0.0122686	0.113524	0.0799364	0.15755		0.0480793	0.0776138
r2t_995	88	0.999992	0.976471	1.02541	0.0123843	0.113529	0.0787849	0.158412		0.0489374	0.0796276
r2t_995	89	1.00002	0.976816	1.02499	0.0122819	0.113768	0.0794585	0.159094		0.048177	0.0796355
r2t_995	90	0.999996	0.976499	1.02433	0.0121749	0.113731	0.0796454	0.159181		0.0478351	0.0795352
r2t_995	91	1.00027	0.97717	1.02475	0.0120617	0.11407	0.0806346	0.158086		0.0475836	0.0774512
r2t_995	92	0.999976	0.976386	1.0249	0.0122675	0.114094	0.0801279	0.158497		0.048512	0.0783693
r2t_995	93	0.999982	0.976863	1.0246	0.0121697	0.114274	0.0804755	0.15863		0.0477348	0.0781548
r2t_995	94	0.999962	0.977324	1.02402	0.0119661	0.114048	0.0806018	0.156829		0.0467005	0.076227
r2t_995	95	0.999783	0.976978	1.02434	0.0120854	0.113724	0.080363	0.157311		0.0473643	0.076948
r2t_995	96	0.999966	0.977575	1.02395	0.0117843	0.113632	0.0805143	0.157969		0.0463756	0.0774552
r2t_995	97	0.999845	0.97771	1.0238	0.0117509	0.113703	0.0807967	0.156467		0.0460866	0.0756698
r2t_995	98	0.99982	0.97766	1.02303	0.0115873	0.113845	0.080819	0.157983		0.0453734	0.0771636
r2t_995	99	0.999904	0.977718	1.0233	0.0115872	0.113518	0.0809792	0.155591		0.0455768	0.0746121
r2t_995	100	0.999954	0.977749	1.02362	0.0115936	0.11412	0.0809312	0.157797		0.0458751	0.0768657
r2t_995	101	1.0002	0.977705	1.02371	0.0117176	0.113849	0.0815434	0.156637		0.0460096	0.0750936
r2t_995	102	1.00009	0.978175	1.02343	0.011475	0.114291	0.0815039	0.15643		0.0452502	0.074926
r2t_995	103	1.00015	0.977751	1.02365	0.0116178	0.113951	0.0812364	0.155966		0.0458991	0.0747296
r2t_995	104	0.999934	0.977799	1.02323	0.0114311	0.114007	0.081812	0.155323		0.0454271	0.0735112
r2t_995	105	1	0.978578	1.02296	0.011254	0.11437	0.082019	0.156007		0.0443837	0.0739881
r2t_995	106	1.00008	0.978675	1.02296	0.0112467	0.114229	0.0824534	0.155698		0.0442863	0.0732447
r2t_995	107	1.0001	0.978528	1.0228	0.0111662	0.114278	0.0821938	0.155274		0.0442737	0.0730799
r2t_995	108	1	0.978557	1.02256	0.0111699	0.113942	0.0818122	0.154293		0.0439999	0.0724811
r2t_995	109	1.00014	0.978969	1.02264	0.0110524	0.114336	0.0825106	0.154877		0.0436692	0.0723661
r2t_995	110	1.00002	0.978844	1.02192	0.0110761	0.113854	0.0822607	0.155432		0.0430763	0.0731711
r2t_995	111	1.00011	0.97939	1.02247	0.0110587	0.114304	0.0823529	0.154971		0.0430793	0.0726184
r2t_995	112	0.99999	0.97914	1.02247	0.0110038	0.114177	0.0823234	0.154312		0.0433294	0.0719886
r2t_995	113	1.00006	0.979464	1.02228	0.0108693	0.114062	0.0824491	0.154323		0.0428168	0.0718742
r2t_995	114	1.00005	0.978776	1.02193	0.0108696	0.114516	0.0826779	0.154821		0.0431566	0.0721435
r2t_995	115	1.00009	0.979606	1.02218	0.0107988	0.114301	0.0833154	0.153863		0.0425746	0.0705472
r2t_995	116	1.00022	0.97969	1.02166	0.0108427	0.114539	0.0832054	0.154415		0.0419688	0.0712101
r2t_995	117	1.00013	0.979834	1.02184	0.0107282	0.114073	0.0835304	0.153902		0.0420069	0.0703714
r2t_995	118	1.00007	0.979554	1.02177	0.0107082	0.11447	0.0836127	0.153		0.0422124	0.0693875
r2t_995	119	1.00002	0.979922	1.02148	0.0105124	0.11416	0.0837034	0.153068		0.0415591	0.0693649
r2t_995	120	0.999958	0.97958	1.02099	0.0105327	0.114198	0.0836566	0.153058		0.0414053	0.0694016
r2t_995	121	1.00011	0.980076	1.0219	0.0107143	0.114315	0.0834879	0.152964		0.0418189	0.0694763
r2t_995	122	0.999968	0.979587	1.02131	0.0106465	0.11428	0.0836139	0.152552		0.0417193	0.068938
r2t_995	123	1.00002	0.979955	1.02143	0.0105218	0.114372	0.0840916	0.153161		0.0414761	0.069069
r2t_995	124	1.00006	0.980312	1.02122	0.0104459	0.114346	0.084259	0.152964		0.0409035	0.0687048
r2t_995	125	1.00001	0.980471	1.02096	0.010294	0.114265	0.0841207	0.152769		0.0404856	0.0686486
r2t_995	126	1.00013	0.980031	1.02109	0.0103549	0.114544	0.0847379	0.151836		0.0410634	0.067098
r2t_995	127	0.999934	0.98008	1.02043	0.0103036	0.114359	0.0841435	0.15188		0.0403541	0.0677367
r2t_995	128	0.999993	0.980037	1.02031	0.0102598	0.114279	0.0843074	0.151977		0.040274	0.0676691
r2t_995	129	1.00035	0.98078	1.02109	0.0103444	0.11477	0.0848889	0.151953		0.0403092	0.0670645
r2t_995	130	0.999954	0.980568	1.02021	0.0101052	0.114083	0.0848709	0.151517		0.0396455	0.0666465
r2t_995	131	0.999957	0.980651	1.02009	0.0101755	0.114648	0.0848107	0.1523		0.0394378	0.0674889
r2t_995	132	1.00011	0.980691	1.02087	0.0101333	0.114553	0.0846491	0.152072		0.0401831	0.0674228
r2t_995	133	1.00011	0.980758	1.02007	0.0100526	0.11428	0.0845696	0.150738		0.0393133	0.0661679
r2t_995	134	0.999899	0.980819	1.01996	0.0100597	0.114355	0.0848566	0.150625		0.0391424	0.0657683
r2t_995	135	0.999927	0.980633	1.01998	0.00998772	0.114456	0.0850191	0.150873		0.0393498	0.065854
r2t_995	136	1.00006	0.981253	1.02005	0.00992127	0.114709	0.0853447	0.151416		0.0387993	0.0660716
r2t_995	137	0.99997	0.981156	1.01969	0.00996551	0.114697	0.0854266	0.151145		0.0385344	0.0657186
r2t_995	138	1.00021	0.981459	1.02024	0.00989984	0.114562	0.0853558	0.150311		0.0387827	0.0649554
r2t_995	139	1.00013	0.981189	1.0202	0.00990024	0.114578	0.0854609	0.150478		0.0390063	0.0650171
r2t_995	140	0.999948	0.981273	1.01977	0.00986708	0.114512	0.0859194	0.149963		0.0385	0.0640433
r2t_995	141	1.0001	0.981544	1.01963	0.00978674	0.114535	0.0854352	0.150179		0.038083	0.0647438
r2t_995	142	1.00001	0.9812	1.01981	0.00977474	0.114558	0.0857876	0.149834		0.0386081	0.0640461
r2t_995	143	0.999881	0.980927	1.02001	0.00982955	0.114469	0.0858067	0.150206		0.0390869	0.0643993
r2t_995	144	1.00001	0.981661	1.01962	0.00970024	0.11494	0.085964	0.151592		0.037957	0.0656281
r2t_995	145	0.999961	0.981527	1.01977	0.00961737	0.114684	0.0861935	0.150017		0.0382463	0.0638235
r2t_995	146	1.00019	0.98166	1.01934	0.00956423	0.114766	0.086272	0.149973		0.0376806	0.063701
r2t_995	147	1.00005	0.981666	1.01901	0.00949062	0.114603	0.0861871	0.150039		0.03734	0.0638519
r2t_995	148	1.00001	0.981361	1.01917	0.00964042	0.114629	0.086191	0.149516		0.0378053	0.0633251
r2t_995	149	1.00018	0.982152	1.01902	0.00940983	0.114556	0.0864703	0.148888		0.0368659	0.0624179
r2t_995	150	1.00005	0.981986	1.01928	0.00947463	0.114721	0.0862996	0.149404		0.0372986	0.0631046
r2t_995	151	1.00026	0.982286	1.01909	0.00939135	0.115078	0.0869944	0.149908		0.0368071	0.0629137
r2t_995	152	1.0002	0.981943	1.01947	0.00950346	0.114893	0.0864421	0.150136		0.0375225	0.0636936
r2t_995	153	1.00017	0.981903	1.01935	0.00946817	0.114442	0.0865249	0.149824		0.0374481	0.063299
r2t_995	154	0.999986	0.982175	1.01862	0.00927103	0.114568	0.0862275	0.149058		0.0364478	0.0628309
r2t_995	155	1.00005	0.982286	1.01912	0.00937617	0.114467	0.0861953	0.14838		0.0368363	0.0621846
r2t_995	156	1.00019	0.982617	1.01878	0.00920767	0.114877	0.0866529	0.14886		0.0361593	0.0622072
r2t_995	157	1.00003	0.982573	1.01887	0.0092999	0.114724	0.0867706	0.148708		0.0363019	0.061937
r2t_995	158	1	0.981801	1.01857	0.00933562	0.114883	0.087186	0.148258		0.0367669	0.0610723
r2t_995	159	1.00006	0.982323	1.01876	0.00926281	0.114582	0.0873345	0.147672		0.0364364	0.0603372
r2t_995	160	1	0.98248	1.01854	0.00921879	0.114723	0.0869787	0.148606		0.0360556	0.061627
r2t_995	161	1.0001	0.982336	1.01875	0.00916672	0.114887	0.0874817	0.148232		0.0364135	0.0607504
r2t_995	162	0.999996	0.982315	1.01772	0.00911519	0.114807	0.0874509	0.147562		0.0354057	0.0601114
r2t_995	163	1.00009	0.982857	1.01865	0.00907846	0.114785	0.0874827	0.147741		0.0357916	0.0602585
r2t_995	164	1.00008	0.982538	1.01865	0.00913291	0.114735	0.0874907	0.147232		0.0361134	0.0597409
r2t_995	165	0.999985	0.982869	1.01825	0.0089891	0.114759	0.087186	0.147385		0.0353791	0.0601989
r2t_995	166	1.00013	0.983052	1.01837	0.00908358	0.114861	0.0870948	0.147754		0.035318	0.0606594
r2t_995	167	0.999981	0.982787	1.0182	0.00900305	0.114791	0.0871867	0.146822		0.0354088	0.0596354
r2t_995	168	1.00005	0.983132	1.01767	0.00895907	0.115026	0.0878329	0.148182		0.0345377	0.0603496
r2t_995	169	1.0003	0.983298	1.01843	0.00895524	0.115006	0.0880324	0.147696		0.0351298	0.059664
r2t_995	170	0.99998	0.983023	1.0183	0.00897851	0.114936	0.0876407	0.146845		0.0352814	0.059204
r2t_995	171	1.00003	0.982985	1.01852	0.00893012	0.114922	0.0878678	0.147044		0.0355384	0.0591766
r2t_995	172	0.999973	0.983102	1.01766	0.00884348	0.114816	0.0880907	0.146804		0.0345539	0.0587132
r2t_995	173	1.00005	0.983048	1.01801	0.0088465	0.114682	0.088074	0.146214		0.0349622	0.0581395
r2t_995	174	1.00014	0.98351	1.01764	0.00872324	0.115116	0.0879399	0.146734		0.0341307	0.0587943
r2t_995	175	1.00014	0.982956	1.018	0.00887523	0.11508	0.0885518	0.147111		0.0350483	0.0585592
r2t_995	176	1.00003	0.983102	1.01773	0.00879466	0.114893	0.0885755	0.145955		0.0346317	0.0573796
r2t_995	177	1.00007	0.983451	1.01772	0.00876477	0.115194	0.0886505	0.14659		0.0342709	0.0579391
r2t_995	178	1.00004	0.983427	1.01736	0.00864362	0.114756	0.0887338	0.146663		0.0339359	0.0579291
r2t_995	179	0.999977	0.983353	1.01742	0.00869534	0.114914	0.0887996	0.146542		0.0340662	0.0577427
r2t_995	180	0.999957	0.983295	1.01783	0.00879375	0.115074	0.0888259	0.146139		0.0345305	0.0573133
r2t_995	181	1.00027	0.983733	1.01756	0.00860112	0.114903	0.0883315	0.145941		0.0338239	0.0576091
r2t_995	182	0.999991	0.983245	1.01768	0.00865839	0.114752	0.0883783	0.146229		0.0344379	0.0578511
r2t_995	183	1.00013	0.983635	1.01746	0.00862873	0.115016	0.0888565	0.146651		0.0338291	0.0577949
r2t_995	184	1.00001	0.983587	1.01728	0.00861777	0.114818	0.0892417	0.145767		0.0336878	0.0565251
r2t_995	185	1.00004	0.984004	1.01702	0.0084812	0.114895	0.0888403	0.145203		0.0330136	0.0563625
r2t_995	186	1.00021	0.983905	1.01712	0.008467	0.115078	0.0892559	0.145818		0.0332114	0.0565617
r2t_995	187	1.00003	0.98363	1.0171	0.00853672	0.115012	0.0888499	0.146628		0.0334662	0.0577779
r2t_995	188	1.00002	0.984028	1.01686	0.00837431	0.115377	0.0893011	0.1454		0.0328267	0.0560989
r2t_995	189	0.999908	0.983663	1.01657	0.00844694	0.115036	0.0891148	0.14528		0.0329122	0.0561648
r2t_995	190	1.00001	0.984002	1.017	0.00837816	0.115113	0.0893698	0.146009		0.0330029	0.0566391
r2t_995	191	1.00007	0.983855	1.0168	0.0083718	0.114953	0.0888937	0.145789		0.0329487	0.0568953
r2t_995	192	0.999957	0.983921	1.01739	0.00844932	0.114998	0.0889329	0.146066		0.0334656	0.0571335
r2t_995	193	0.999887	0.984089	1.01628	0.00834458	0.115296	0.0894747	0.145298		0.0321957	0.0558233
r2t_995	194	0.999917	0.98358	1.01689	0.00844354	0.114799	0.0893669	0.145022		0.0333101	0.0556555
r2t_995	195	1.00001	0.983933	1.01635	0.00827584	0.114868	0.0893081	0.144823		0.0324162	0.055515
r2t_995	196	1.00004	0.984391	1.01696	0.00829406	0.11503	0.0892546	0.145346		0.0325688	0.0560918
r2t_995	197	1.00012	0.984303	1.01631	0.00828502	0.115354	0.0897247	0.146291		0.0320066	0.0565666
r2t_995	198	0.999973	0.984316	1.01638	0.00822455	0.114932	0.0898626	0.144197		0.0320588	0.0543348
r2t_995	199	1.00014	0.984312	1.01673	0.00820922	0.114976	0.0895885	0.144728		0.032414	0.0551397
r2t_995	200	0.999912	0.9841	1.01634	0.00823118	0.114956	0.0900938	0.145111		0.0322431	0.055017
r2t_995	201	1.00001	0.984167	1.01638	0.00820157	0.11504	0.0895162	0.144714		0.03221	0.0551982
r2t_995	202	0.999961	0.984196	1.01637	0.00815009	0.11491	0.0905727	0.143918		0.0321759	0.053345
r2t_995	203	0.999957	0.984415	1.01646	0.00816731	0.11513	0.0900076	0.144676		0.0320443	0.0546682
r2t_995	204	1.00001	0.984194	1.01638	0.00815201	0.115202	0.0902502	0.144609		0.0321839	0.054359
r2t_995	205	1.0001	0.984744	1.01609	0.00806175	0.115066	0.0897404	0.144095		0.0313508	0.0543544
r2t_995	206	1.00029	0.984932	1.01633	0.00799666	0.115074	0.0902328	0.144541		0.0313947	0.0543086
r2t_995	207	0.999915	0.984097	1.01602	0.00808607	0.115189	0.0903658	0.14453		0.0319222	0.0541641
r2t_995	208	0.999961	0.984678	1.01615	0.00804502	0.115118	0.0903433	0.144184		0.0314667	0.0538407
r2t_995	209	0.999995	0.98457	1.01642	0.00804043	0.114859	0.0903319	0.144161		0.0318521	0.0538294
r2t_995	210	1.00001	0.984904	1.01592	0.00795121	0.114869	0.0904326	0.144093		0.0310198	0.0536602
r2t_995	211	1	0.984694	1.01612	0.00804704	0.115279	0.0901389	0.143837		0.0314215	0.053698
r2t_995	212	1.00003	0.984916	1.01613	0.00799603	0.115315	0.0907571	0.144091		0.0312121	0.0533343
r2t_995	213	1.00011	0.984592	1.01647	0.00806195	0.115433	0.0911307	0.143483		0.0318798	0.0523519
r2t_995	214	1.00002	0.984697	1.01621	0.00802842	0.115069	0.0908349	0.144489		0.031517	0.0536539
r2t_995	215	1.00018	0.984685	1.01602	0.00798294	0.115353	0.0908392	0.143858		0.0313352	0.0530191
r2t_995	216	1.00007	0.985185	1.01623	0.00791548	0.11526	0.0909033	0.143814		0.0310422	0.0529107
r2t_995	217	0.999958	0.984788	1.01555	0.00781735	0.115315	0.0908954	0.143111		0.0307573	0.0522154
r2t_995	218	1.00012	0.985059	1.01568	0.00782832	0.115141	0.0903503	0.143141		0.0306224	0.0527907
r2t_995	219	1.00001	0.984911	1.01554	0.00781617	0.115186	0.0902111	0.143794		0.0306247	0.053583
r2t_995	220	1.00001	0.984856	1.01559	0.00780486	0.115187	0.0912012	0.14338		0.0307365	0.0521791
r2t_995	221	0.99998	0.985276	1.01554	0.00767171	0.114974	0.0901737	0.143014		0.0302655	0.05284
r2t_995	222	1.00009	0.985109	1.01578	0.00778951	0.115317	0.091532	0.143956		0.0306717	0.052424
r2t_995	223	0.999786	0.984942	1.01551	0.0077383	0.115109	0.0910184	0.143138		0.0305678	0.0521197
r2t_995	224	1.00001	0.984865	1.01572	0.00787524	0.115096	0.0908093	0.143631		0.0308507	0.0528214
r2t_995	225	1.0001	0.985266	1.01552	0.0076565	0.115179	0.0911368	0.143097		0.030251	0.05196
r2t_995	226	1.00003	0.98516	1.01559	0.00772544	0.115275	0.0916683	0.143328		0.0304254	0.0516599
r2t_995	227	0.999987	0.985169	1.01535	0.00776148	0.115239	0.0910344	0.143246		0.0301827	0.0522121
r2t_995	228	0.999984	0.984781	1.01546	0.00781413	0.115169	0.0915403	0.143401		0.0306779	0.0518603
r2t_995	229	1.00004	0.985547	1.01548	0.00769135	0.115125	0.0913494	0.143037		0.029929	0.0516878
r2t_995	230	0.999908	0.985403	1.0154	0.00762139	0.115169	0.0910898	0.142691		0.0299934	0.051601
r2t_995	231	1.00003	0.985245	1.01551	0.00767051	0.115274	0.0915501	0.142853		0.0302696	0.0513029
r2t_995	232	0.999883	0.985307	1.0152	0.00763236	0.115052	0.0914693	0.142626		0.0298936	0.0511568
r2t_995	233	1.00003	0.985128	1.01502	0.00765042	0.115178	0.0916207	0.142237		0.0298894	0.0506167
r2t_995	234	0.999973	0.985413	1.0151	0.00755167	0.115114	0.0912214	0.142996		0.0296828	0.0517743
r2t_995	235	1.00005	0.98547	1.01521	0.00752317	0.115234	0.0917947	0.142368		0.0297361	0.0505738
r2t_995	236	1.00013	0.985356	1.01543	0.00767886	0.11549	0.0916883	0.142999		0.0300779	0.0513109
r2t_995	237	0.999956	0.985632	1.01516	0.00756193	0.115487	0.0915827	0.142178		0.0295253	0.0505953
r2t_995	238	1.00017	0.985511	1.0155	0.00762631	0.115412	0.0918944	0.142785		0.0299857	0.0508907
r2t_995	239	1.00034	0.985954	1.01561	0.00755393	0.11515	0.0915217	0.142543		0.029654	0.0510212
r2t_995	240	0.999941	0.985372	1.01523	0.00757062	0.115295	0.0916893	0.142244		0.0298569	0.0505543
r2t_995	241	1.00019	0.98587	1.01498	0.00745891	0.115363	0.0919213	0.14287		0.0291121	0.0509491
r2t_995	242	1.00011	0.985799	1.01512	0.00748258	0.115372	0.0920366	0.142276		0.0293254	0.0502391
r2t_995	243	1.00011	0.986041	1.01493	0.00740954	0.11538	0.0919589	0.141453		0.0288871	0.0494942
r2t_995	244	0.999973	0.985743	1.01472	0.00738503	0.115183	0.0915711	0.142684		0.0289805	0.0511128
r2t_995	245	1.00005	0.985576	1.01501	0.00750428	0.115186	0.0916074	0.142519		0.0294357	0.0509115
r2t_995	246	1.00009	0.985766	1.01478	0.00736023	0.115167	0.0913144	0.142126		0.0290152	0.0508118
r2t_995	247	0.999981	0.985838	1.01469	0.00737029	0.115241	0.0923036	0.141925		0.028853	0.0496219
r2t_995	248	0.999917	0.985785	1.01491	0.00743065	0.115346	0.0918025	0.142629		0.0291293	0.050827
r2t_995	249	1.00007	0.986029	1.01511	0.00740573	0.115235	0.0922279	0.141506		0.0290804	0.0492785
r2t_995	250	1	0.985998	1.01475	0.00733463	0.115159	0.0915864	0.141619		0.0287514	0.0500322
r2t_995	251	1.00008	0.986098	1.01478	0.00734097	0.115346	0.091937	0.141464		0.0286822	0.0495274
r2t_995	252	0.99999	0.986159	1.0145	0.00727148	0.115239	0.0922055	0.141688		0.0283395	0.0494829
r2t_995	253	1.00004	0.986134	1.0147	0.00728043	0.115213	0.0917888	0.142369		0.0285679	0.0505799
r2t_995	254	0.999915	0.986014	1.01411	0.00729028	0.115084	0.0924338	0.14197		0.0280958	0.0495359
r2t_995	255	1.0002	0.985988	1.01477	0.00735863	0.115354	0.0920337	0.142596		0.0287865	0.0505627
r2t_995	256	1.00006	0.98619	1.0145	0.00718722	0.115327	0.0925246	0.14136		0.0283103	0.048835
r2t_995	257	1.00005	0.986373	1.01453	0.00722141	0.115339	0.0926932	0.14107		0.0281551	0.0483772
r2t_995	258	1.00015	0.986258	1.01444	0.00727228	0.115376	0.0921556	0.141449		0.028186	0.0492931
r2t_995	259	1.00003	0.985781	1.01499	0.00730552	0.115361	0.0926354	0.141605		0.0292088	0.0489701
r2t_995	260	0.999978	0.986196	1.01433	0.00718985	0.115255	0.0926567	0.141588		0.0281343	0.048931
r2t_995	261	0.999979	0.986076	1.01464	0.00722016	0.114965	0.0926141	0.140939		0.0285631	0.0483245
r2t_995	262	0.999957	0.985915	1.01418	0.00718358	0.11526	0.0926582	0.140908		0.0282648	0.0482495
r2t_995	263	1.00006	0.986361	1.01419	0.00711091	0.115217	0.0922432	0.141298		0.0278341	0.0490552
r2t_995	264	1.00004	0.986286	1.01417	0.00708055	0.115106	0.0926736	0.140923		0.0278821	0.0482496
r2t_995	265	1.0002	0.986437	1.01447	0.00716367	0.115566	0.0928259	0.141341		0.0280291	0.0485147
r2t_995	266	1	0.98635	1.01424	0.00708662	0.115613	0.0932194	0.141428		0.0278894	0.0482091
r2t_995	267	0.999967	0.986234	1.01403	0.00708937	0.115394	0.0930061	0.140741		0.027793	0.0477344
r2t_995	268	1.00008	0.986413	1.01419	0.00708733	0.115345	0.0932616	0.141836		0.0277745	0.0485748
r2t_995	269	1.00023	0.986589	1.01449	0.00710355	0.115399	0.0932358	0.140828		0.0279047	0.0475918
r2t_995	270	1.0001	0.986504	1.01407	0.00704787	0.115466	0.0930232	0.14078		0.0275637	0.0477565
r2t_995	271	1.00008	0.986518	1.01427	0.00708134	0.11497	0.0926325	0.140416		0.0277554	0.0477837
r2t_995	272	1.00006	0.98627	1.01439	0.00711923	0.115277	0.092995	0.140606		0.0281161	0.0476106
r2t_995	273	0.999991	0.986435	1.01387	0.00702032	0.115296	0.0931662	0.140223		0.0274318	0.0470572
r2t_995	274	1.00002	0.986643	1.01411	0.00702817	0.115489	0.0930604	0.141226		0.0274716	0.0481651
r2t_995	275	1.00011	0.986598	1.01438	0.00705534	0.115479	0.0933011	0.140622		0.0277797	0.0473213
r2t_995	276	1.00001	0.986341	1.01407	0.00705637	0.115429	0.093065	0.140608		0.0277317	0.0475431
r2t_995	277	0.999895	0.98649	1.01366	0.00692541	0.115376	0.0933105	0.139842		0.0271696	0.0465312
r2t_995	278	1.00002	0.98669	1.01372	0.00691905	0.11527	0.0931107	0.140489		0.0270303	0.0473786
r2t_995	279	1.00011	0.986977	1.01412	0.00689796	0.115471	0.0934747	0.140393		0.0271456	0.0469182
r2t_995	280	0.999997	0.986537	1.01357	0.00687042	0.115257	0.0931658	0.140475		0.0270323	0.0473092
r2t_995	281	1.00004	0.986591	1.01413	0.00699097	0.115427	0.093331	0.140755		0.0275397	0.0474238
r2t_995	282	0.999989	0.986577	1.01357	0.0068855	0.115371	0.0937659	0.140362		0.026993	0.0465965
r2t_995	283	0.999947	0.986488	1.01385	0.00693169	0.115554	0.0934913	0.140551		0.0273573	0.0470597
r2t_995	284	1.00015	0.986681	1.01416	0.00700615	0.115541	0.0935521	0.140499		0.0274803	0.0469465
r2t_995	285	1.00003	0.986947	1.01364	0.00684942	0.115593	0.0936834	0.140495		0.0266951	0.0468119
r2t_995	286	1.0001	0.986858	1.01385	0.00684814	0.11549	0.0939652	0.140507		0.026991	0.0465416
r2t_995	287	1.00008	0.986647	1.01363	0.00685944	0.115664	0.0936764	0.140798		0.026985	0.0471218
r2t_995	288	1.00001	0.986646	1.01388	0.00690155	0.115364	0.0937903	0.140006		0.0272369	0.0462155
r2t_995	289	1.00001	0.986748	1.01357	0.0068581	0.115291	0.0933612	0.139908		0.0268236	0.0465467
r2t_995	290	1.00006	0.987085	1.01355	0.00678681	0.115506	0.0933941	0.139407		0.0264676	0.0460127
r2t_995	291	1.00008	0.98728	1.01389	0.00677694	0.115472	0.0938464	0.139939		0.026609	0.0460923
r2t_995	292	1.00003	0.987078	1.01383	0.00682106	0.115338	0.0938252	0.139959		0.0267495	0.0461336
r2t_995	293	1.00013	0.986975	1.01334	0.00677483	0.115454	0.0939781	0.139448		0.0263693	0.0454699
r2t_995	294	1.00001	0.986946	1.0136	0.00679291	0.115432	0.0941788	0.139259		0.0266491	0.04508
r2t_995	295	1.00001	0.986799	1.01365	0.00685548	0.115477	0.0935281	0.139401		0.0268478	0.0458731
r2t_995	296	0.999978	0.986817	1.01357	0.00681242	0.115249	0.093968	0.139517		0.0267561	0.0455494
r2t_995	297	1.00019	0.987127	1.01375	0.00672925	0.11535	0.0940114	0.139735		0.0266204	0.0457235
r2t_995	298	1.00002	0.986969	1.01347	0.00671034	0.115376	0.0939723	0.139544		0.0265015	0.0455716
r2t_995	299	0.999937	0.987108	1.01336	0.00674696	0.115201	0.0939806	0.139107		0.0262513	0.0451264
r2t_995	300	1.00003	0.986969	1.01341	0.00673583	0.115421	0.0942316	0.13962		0.0264436	0.0453884
r2t_995	301	1.00004	0.987246	1.0136	0.00672612	0.115417	0.0947169	0.139058		0.0263489	0.0443413
r2t_995	302	1.00013	0.987331	1.01332	0.00669746	0.115474	0.0943447	0.139347		0.0259885	0.0450025
r2t_995	303	1.00012	0.987351	1.0135	0.0066934	0.115374	0.0942039	0.139328		0.0261477	0.0451245
r2t_995	304	1.00007	0.986858	1.0134	0.0067208	0.11539	0.094284	0.139188		0.0265414	0.0449044
r2t_995	305	1.00006	0.986931	1.01313	0.00662743	0.115451	0.0943769	0.139484		0.0261968	0.0451071
r2t_995	306	1.00001	0.98746	1.01297	0.00654769	0.115504	0.0945193	0.138689		0.0255073	0.0441696
r2t_995	307	1.00003	0.986997	1.01333	0.00667125	0.115477	0.0943333	0.139222		0.0263332	0.0448883
r2t_995	308	1.00014	0.987313	1.01369	0.00668813	0.115659	0.0948982	0.139374		0.0263822	0.0444757
r2t_995	309	1.00006	0.987148	1.01341	0.00664591	0.115561	0.094749	0.138403		0.0262591	0.043654
r2t_995	310	1.00005	0.98722	1.01295	0.00659928	0.115454	0.0946618	0.13924		0.0257269	0.0445785
r2t_995	311	1.00012	0.987636	1.01326	0.00652124	0.115636	0.0946277	0.139511		0.0256288	0.0448828
r2t_995	312	1.00008	0.987345	1.01329	0.00660269	0.115475	0.0948051	0.139051		0.0259461	0.0442456
r2t_995	313	1.00008	0.987272	1.01343	0.00665585	0.115468	0.0944125	0.138845		0.0261587	0.0444328
r2t_995	314	0.999936	0.987418	1.0131	0.00655254	0.115291	0.094248	0.138735		0.0256797	0.0444874
r2t_995	315	1.00003	0.98743	1.01342	0.00663188	0.115375	0.0942928	0.139409		0.0259889	0.0451162
r2t_995	316	0.999938	0.987445	1.01327	0.00659875	0.115624	0.095064	0.139331		0.0258266	0.0442672
r2t_995	317	1.00005	0.987307	1.01313	0.00654708	0.115651	0.0951709	0.13921		0.0258255	0.0440388
r2t_995	318	1.00003	0.98742	1.01303	0.00651819	0.115487	0.0944332	0.139109		0.0256079	0.0446759
r2t_995	319	1.00007	0.987146	1.01295	0.00659109	0.115666	0.0946183	0.138367		0.0258038	0.0437483
r2t_995	320	1.00009	0.987627	1.01298	0.00645223	0.115683	0.0954121	0.139482		0.0253512	0.0440701
r2t_995	321	1.00005	0.987511	1.01286	0.00649765	0.115648	0.0950019	0.138875		0.0253541	0.0438727
r2t_995	322	1.00009	0.987345	1.01301	0.00650438	0.115604	0.0946614	0.139107		0.0256628	0.0444458
r2t_995	323	0.999953	0.987514	1.01299	0.00645028	0.115341	0.0948972	0.138663		0.0254763	0.0437653
r2t_995	324	1.00006	0.987745	1.01292	0.00646327	0.115669	0.0950582	0.139258		0.0251713	0.0441993
r2t_995	325	0.99998	0.987416	1.01293	0.00641454	0.115293	0.094748	0.138353		0.0255185	0.0436049
r2t_995	326	1.00008	0.98782	1.01313	0.00647301	0.115796	0.0950045	0.139152		0.0253093	0.0441475
r2t_995	327	0.999965	0.987441	1.01268	0.00644086	0.115387	0.0947476	0.138629		0.0252408	0.0438815
r2t_995	328	1.00013	0.987962	1.013	0.00635478	0.115488	0.0950393	0.138147		0.0250388	0.0431074
r2t_995	329	0.999987	0.987546	1.01279	0.00640279	0.115591	0.0950466	0.138938		0.0252408	0.0438915
r2t_995	330	1.00006	0.987687	1.01231	0.00635643	0.115545	0.0946348	0.138704		0.0246273	0.0440688
r2t_995	331	1.00001	0.988015	1.01258	0.00635868	0.115429	0.0949663	0.138334		0.0245697	0.0433681
r2t_995	332	1.00004	0.987631	1.01279	0.00634252	0.115465	0.0951245	0.138493		0.0251583	0.0433689
r2t_995	333	1.00006	0.987907	1.0128	0.00633784	0.115685	0.0953308	0.13874		0.0248908	0.0434092
r2t_995	334	1.00009	0.987687	1.0127	0.00637778	0.115642	0.0951584	0.138547		0.0250136	0.0433889
r2t_995	335	1.00005	0.987805	1.0127	0.00633969	0.115391	0.0949325	0.138466		0.0248991	0.0435334
r2t_995	336	1.00006	0.987864	1.01262	0.00636037	0.115637	0.095455	0.137822		0.0247551	0.0423667
r2t_995	337	1.00003	0.987927	1.01269	0.00629561	0.11563	0.0951909	0.138175		0.0247652	0.0429841
r2t_995	338	1.00002	0.988053	1.01254	0.00625638	0.115366	0.0951118	0.138064		0.0244902	0.0429519
r2t_995	339	1.00007	0.988112	1.01266	0.00632107	0.115547	0.0955073	0.138075		0.0245468	0.0425682
r2t_995	340	1.00009	0.987764	1.0124	0.00627032	0.115681	0.0951918	0.138215		0.0246355	0.0430233
r2t_995	341	0.999999	0.987968	1.01244	0.00630194	0.115463	0.0955107	0.137705		0.0244704	0.0421945
r2t_995	342	1.00005	0.987868	1.01256	0.00635543	0.115508	0.095714	0.138168		0.0246881	0.0424545
r2t_995	343	1.00004	0.987743	1.01273	0.00637903	0.115572	0.0956742	0.137791		0.0249825	0.0421169
r2t_995	344	1	0.988139	1.01246	0.00622696	0.115385	0.0948945	0.138128		0.0243199	0.0432336
r2t_995	345	0.999929	0.987983	1.0126	0.00626322	0.115569	0.0956227	0.137756		0.0246161	0.0421338
r2t_995	346	1.00004	0.987964	1.01245	0.00621627	0.11556	0.095694	0.137966		0.0244815	0.0422724
r2t_995	347	1.00005	0.988381	1.01226	0.00613143	0.115644	0.0957512	0.137888		0.0238819	0.0421368
r2t_995	348	0.999992	0.988088	1.01293	0.00629002	0.115734	0.0956133	0.138375		0.0248451	0.0427617
r2t_995	349	0.999974	0.988054	1.01222	0.00616428	0.115486	0.0956707	0.137905		0.0241611	0.0422339
r2t_995	350	1.00013	0.988167	1.01266	0.00620333	0.115738	0.0956132	0.138084		0.0244918	0.042471
r2t_995	351	1.00003	0.988184	1.01241	0.00621819	0.115495	0.0956479	0.137515		0.0242226	0.041867
r2t_995	352	0.999994	0.988157	1.01237	0.00612621	0.115596	0.0957323	0.137706		0.0242095	0.0419736
r2t_995	353	1.00003	0.988029	1.0125	0.00622906	0.115674	0.0956572	0.138153		0.0244702	0.042496
r2t_995	354	1.00003	0.987965	1.01228	0.00621756	0.115613	0.0958006	0.137632		0.0243157	0.0418317
r2t_995	355	1.00009	0.988045	1.0124	0.0062297	0.115602	0.0955777	0.138096		0.0243589	0.0425184
r2t_995	356	1.00019	0.988222	1.01263	0.00618433	0.115625	0.0957469	0.137239		0.0244129	0.0414916
r2t_995	357	1.00007	0.988016	1.01199	0.00612393	0.115526	0.0957807	0.137875		0.0239753	0.0420942
r2t_995	358	0.999942	0.988017	1.01229	0.00616126	0.115523	0.0959603	0.137664		0.0242735	0.041704
r2t_995	359	1.00016	0.988224	1.01247	0.00616039	0.115882	0.0962065	0.138253		0.0242448	0.0420466
r2t_995	360	1.00003	0.987996	1.01231	0.00614495	0.115634	0.0958172	0.13743		0.0243161	0.0416131
r2t_995	361	1.00009	0.988391	1.01244	0.00612881	0.115717	0.0960682	0.13755		0.024053	0.0414821
r2t_995	362	1.00006	0.988337	1.01243	0.00617829	0.115494	0.0960529	0.137367		0.024091	0.0413138
r2t_995	363	0.999988	0.988212	1.0121	0.00609869	0.115598	0.0962853	0.137672		0.0238915	0.0413864
r2t_995	364	1.00005	0.988178	1.01213	0.00613689	0.115564	0.0960288	0.137004		0.0239567	0.0409747
r2t_995	365	0.999996	0.988407	1.0122	0.00611485	0.115611	0.095879	0.137351		0.0237948	0.0414724
r2t_995	366	1.00011	0.988288	1.0125	0.00604929	0.115491	0.0957562	0.137189		0.0242137	0.0414323
r2t_995	367	1.00013	0.988356	1.01214	0.00606851	0.115654	0.0962842	0.137518		0.0237798	0.0412335
r2t_995	368	1	0.98822	1.0123	0.00609477	0.115775	0.096106	0.137517		0.0240821	0.0414114
r2t_995	369	1.00003	0.988553	1.01221	0.0060239	0.115695	0.0961998	0.137188		0.0236555	0.0409882
r2t_995	370	1.00006	0.988319	1.01189	0.00606578	0.115451	0.0958502	0.137324		0.0235755	0.0414736
r2t_995	371	1.00006	0.988148	1.01209	0.00605266	0.115496	0.0959942	0.137004		0.0239424	0.0410097
r2t_995	372	1	0.98828	1.01203	0.0060984	0.115567	0.0962458	0.137104		0.023754	0.0408577
r2t_995	373	0.999971	0.98836	1.01171	0.00601283	0.115617	0.0964303	0.136981		0.0233497	0.040551
r2t_995	374	1.00002	0.988136	1.01222	0.00602525	0.115626	0.0963396	0.137446		0.0240869	0.0411061
r2t_995	375	0.999982	0.988146	1.0121	0.00604328	0.11568	0.0964848	0.136469		0.0239512	0.0399842
r2t_995	376	1.00015	0.988699	1.01214	0.00597246	0.115722	0.0963224	0.137168		0.023441	0.0408461
r2t_995	377	1.00009	0.988448	1.01197	0.00600374	0.115793	0.0964356	0.137172		0.0235224	0.040736
r2t_995	378	1.00002	0.988437	1.01202	0.00603242	0.1157	0.0963612	0.137216		0.0235826	0.0408552
r2t_995	379	1.00002	0.988555	1.01197	0.00596567	0.115572	0.0961599	0.136997		0.0234147	0.0408371
r2t_995	380	1.00002	0.988584	1.01193	0.00593993	0.115579	0.0964071	0.136657		0.0233407	0.0402499
r2t_995	381	1.00006	0.988688	1.01158	0.00590132	0.11541	0.0960467	0.13681		0.0228927	0.0407634
r2t_995	382	0.999985	0.988365	1.01183	0.00595525	0.115681	0.0963354	0.137794		0.0234694	0.041459
r2t_995	383	1.00001	0.988516	1.01212	0.00597677	0.115689	0.0965939	0.136947		0.0236033	0.0403536
r2t_995	384	1.00009	0.988687	1.01229	0.00600396	0.115729	0.0963761	0.137137		0.0236058	0.0407613
r2t_995	385	1.00001	0.988658	1.01199	0.00594081	0.115818	0.096716	0.136991		0.0233303	0.0402748
r2t_995	386	1.00008	0.988548	1.01191	0.00594269	0.115804	0.0967322	0.136763		0.0233591	0.040031
r2t_995	387	1.00004	0.988624	1.01184	0.00589368	0.115503	0.0963932	0.136684		0.0232208	0.0402907
r2t_995	388	0.999974	0.988734	1.01187	0.00589361	0.115638	0.0966915	0.136366		0.0231384	0.0396746
r2t_995	389	1.00005	0.988612	1.01177	0.00589955	0.115721	0.0964122	0.137178		0.0231626	0.0407655
r2t_995	390	1.00007	0.988519	1.01182	0.00590086	0.115739	0.0968262	0.136329		0.0232965	0.039503
r2t_995	391	1.00003	0.988336	1.01152	0.00585056	0.115524	0.0965021	0.136184		0.023188	0.0396822
r2t_995	392	1.00003	0.988675	1.01174	0.00589523	0.115772	0.0966104	0.136489		0.0230631	0.0398791
r2t_995	393	1.00003	0.988584	1.01149	0.00583403	0.115446	0.0964598	0.13647		0.0229085	0.0400106
r2t_995	394	1.00007	0.988607	1.01169	0.0058644	0.115681	0.0968862	0.136547		0.0230837	0.0396607
r2t_995	395	0.999965	0.988734	1.01147	0.00582149	0.11565	0.0964653	0.136484		0.0227345	0.040019
r2t_995	396	1.00006	0.989037	1.01163	0.00579978	0.11568	0.0973654	0.136559		0.0225931	0.0391937
r2t_995	397	1.00009	0.988899	1.01176	0.00581297	0.115825	0.0968191	0.136889		0.0228633	0.0400703
r2t_995	398	0.999952	0.988765	1.01143	0.00580022	0.115695	0.0967486	0.13671		0.0226643	0.0399615
r2t_995	399	1.0001	0.988874	1.01159	0.00580708	0.11551	0.0967491	0.136366		0.0227118	0.0396165
r2t_995	400	0.999989	0.988922	1.01129	0.00576782	0.115642	0.097183	0.136398		0.022372	0.0392151
r2t_995	401	1.00003	0.988651	1.01152	0.00580678	0.115587	0.0964026	0.136854		0.0228684	0.0404518
r2t_995	402	0.999974	0.988959	1.01171	0.00580827	0.115511	0.0966111	0.136518		0.0227532	0.0399074
r2t_995	403	0.999967	0.988668	1.01153	0.00579522	0.115511	0.0968698	0.136239		0.0228572	0.0393691
r2t_995	404	1.00007	0.988999	1.01171	0.00577569	0.115651	0.0967593	0.13701		0.0227087	0.0402502
r2t_995	405	1.00008	0.988829	1.01154	0.0058059	0.115737	0.0966825	0.13637		0.0227139	0.0396872
r2t_995	406	0.999977	0.988716	1.0114	0.00580817	0.115527	0.096901	0.136686		0.0226842	0.0397846
r2t_995	407	1.00002	0.98898	1.01141	0.00572871	0.115673	0.0971586	0.136212		0.0224295	0.0390535
r2t_995	408	1.00011	0.989117	1.01157	0.00571982	0.115636	0.0968769	0.136448		0.0224504	0.0395711
r2t_995	409	1.00002	0.988604	1.01142	0.00581037	0.115592	0.0970138	0.136407		0.0228201	0.0393931
r2t_995	410	1.00006	0.989097	1.01124	0.00571579	0.115774	0.0969139	0.136718		0.0221421	0.0398046
r2t_995	411	0.999987	0.988865	1.01141	0.00570509	0.115664	0.0970378	0.1365		0.0225485	0.0394627
r2t_995	412	1	0.988821	1.01157	0.00572769	0.115623	0.0968935	0.135695		0.0227457	0.0388012
r2t_995	413	1.00017	0.988897	1.01193	0.00579265	0.11565	0.0969474	0.136155		0.0230335	0.0392081
r2t_995	414	1.00005	0.98925	1.01128	0.00565547	0.115731	0.097361	0.13569		0.0220284	0.0383288
r2t_995	415	0.999976	0.989143	1.01148	0.00569986	0.115579	0.0968879	0.136232		0.0223394	0.0393437
r2t_995	416	1.0001	0.989086	1.01123	0.00568552	0.115761	0.0975647	0.135902		0.0221427	0.0383371
r2t_995	417	1.0001	0.988777	1.01166	0.00579692	0.115699	0.0969178	0.135918		0.0228858	0.0390001
r2t_995	418	0.999962	0.988988	1.01126	0.00570002	0.115513	0.0972289	0.135921		0.022276	0.0386923
r2t_995	419	0.999984	0.989	1.01134	0.00566528	0.115601	0.0972666	0.135894		0.0223351	0.0386272
r2t_995	420	1.00006	0.988964	1.01136	0.00564949	0.115667	0.097204	0.1359		0.0223964	0.0386959
r2t_995	421	1.00007	0.989005	1.01144	0.00569997	0.115717	0.0975389	0.136231		0.0224355	0.0386925
r2t_995	422	0.999986	0.989161	1.01142	0.00565459	0.115465	0.0968621	0.135793		0.0222558	0.0389307
r2t_995	423	1.00013	0.989403	1.01124	0.00556344	0.115805	0.0976243	0.135513		0.0218381	0.0378891
r2t_995	424	1.00004	0.989086	1.01123	0.00561911	0.115899	0.0975425	0.136718		0.0221433	0.039175
r2t_995	425	1.00016	0.989313	1.01124	0.00563137	0.11578	0.0975767	0.136089		0.0219245	0.038512
r2t_990	2	1.00474	0.8125	1.3475	0.11537	0.0720133	0.0015	0.3595		0.535	0.358
r2t_990	3	1.00431	0.848667	1.26767	0.0947715	0.0952871	0.0106333	0.392249		0.419	0.381616
r2t_990	4	1.00451	0.875	1.22509	0.0814538	0.105955	0.0172101	0.389803		0.350088	0.372593
r2t_990	5	1.00518	0.885519	1.19656	0.0738969	0.113488	0.0249121	0.384271		0.311039	0.359359
r2t_990	6	1.00536	0.895159	1.176	0.0673867	0.121327	0.029324	0.372035		0.280841	0.342711
r2t_990	7	1.00444	0.902857	1.15987	0.0619521	0.122942	0.0339262	0.362574		0.257014	0.328648
r2t_990	8	1.00435	0.909375	1.14301	0.0576387	0.126993	0.0373177	0.37731		0.233637	0.339992
r2t_990	9	1.00487	0.915487	1.13642	0.0545038	0.132179	0.0403224	0.369029		0.220933	0.328706
r2t_990	10	1.00529	0.9209	1.12578	0.0515055	0.133602	0.0432879	0.358505		0.204877	0.315217
r2t_990	11	1.00542	0.924006	1.12424	0.0501408	0.13501	0.045065	0.34859		0.200236	0.303525	Biased high
r2t_990	12	1.0048	0.926316	1.11187	0.0469498	0.13694	0.0476929	0.339745		0.185557	0.292052
r2t_990	13	1.00502	0.928379	1.10588	0.045309	0.138851	0.050213	0.330838		0.177505	0.280625
r2t_990	14	1.00522	0.93249	1.10351	0.0433328	0.139806	0.0514144	0.325065		0.17102	0.273651
r2t_990	15	1.00552	0.934612	1.10128	0.0425091	0.142045	0.0536278	0.318607		0.166672	0.264979
r2t_990	16	1.00496	0.934461	1.09755	0.0410676	0.142461	0.0548985	0.313075		0.163091	0.258177
r2t_990	17	1.00567	0.937941	1.09702	0.0402448	0.144215	0.0567797	0.310638		0.159082	0.253858
r2t_990	18	1.00514	0.939762	1.09286	0.0384161	0.143946	0.0568189	0.30499		0.153099	0.248172
r2t_990	19	1.0053	0.940172	1.0891	0.0377068	0.146171	0.0596917	0.298995		0.148923	0.239304
r2t_990	20	1.00485	0.942354	1.08602	0.0363739	0.146701	0.0607578	0.295222		0.143668	0.234464
r2t_990	21	1.00517	0.944091	1.08437	0.0356438	0.146725	0.0617167	0.295587		0.140277	0.23387
r2t_990	22	1.00486	0.944673	1.08439	0.0354085	0.147989	0.063679	0.288593		0.139718	0.224914
r2t_990	23	1.00538	0.946892	1.08154	0.0343259	0.148155	0.0643978	0.284877		0.134645	0.220479
r2t_990	24	1.00502	0.945438	1.08034	0.0337619	0.148805	0.0668272	0.28549		0.134901	0.218662
r2t_990	25	1.00512	0.947952	1.07876	0.0327913	0.149324	0.0668609	0.282758		0.130806	0.215897
r2t_990	26	1.00529	0.949622	1.07327	0.0317794	0.150479	0.0678107	0.281042		0.123649	0.213231
r2t_990	27	1.00524	0.950088	1.07632	0.0318484	0.150503	0.0682196	0.277976		0.126231	0.209756
r2t_990	28	1.00553	0.952934	1.07213	0.0304468	0.151304	0.0688671	0.276809		0.119196	0.207942
r2t_990	29	1.00463	0.950796	1.07034	0.0301761	0.150067	0.0698756	0.272127		0.119541	0.202251
r2t_990	30	1.00536	0.952699	1.07016	0.0301078	0.152137	0.070879	0.275259		0.117458	0.20438
r2t_990	31	1.00559	0.954319	1.07036	0.0295351	0.15129	0.0713168	0.274828		0.116041	0.203511
r2t_990	32	1.0051	0.953511	1.06727	0.0289635	0.151909	0.0728213	0.272144		0.113757	0.199323
r2t_990	33	1.00526	0.955353	1.0689	0.0288799	0.153537	0.0741614	0.271219		0.113546	0.197058
r2t_990	34	1.00484	0.955766	1.06435	0.0280483	0.152155	0.0739169	0.267254		0.10858	0.193337
r2t_990	35	1.00551	0.956299	1.06642	0.0277977	0.154062	0.0765552	0.266991		0.110118	0.190436
r2t_990	36	1.00494	0.957084	1.06451	0.027383	0.15321	0.0740753	0.266111		0.107426	0.192036
r2t_990	37	1.00466	0.957037	1.06315	0.027022	0.153745	0.0773173	0.265098		0.106108	0.187781
r2t_990	38	1.00537	0.958489	1.06338	0.0264686	0.154394	0.0782436	0.261569		0.104889	0.183326
r2t_990	39	1.00513	0.958522	1.06187	0.0261285	0.153872	0.0776544	0.259303		0.103346	0.181649
r2t_990	40	1.00511	0.959479	1.06083	0.0259632	0.154504	0.0791757	0.259406		0.101356	0.18023
r2t_990	41	1.00511	0.959399	1.05959	0.0256856	0.154964	0.0791715	0.258082		0.100195	0.17891
r2t_990	42	1.00489	0.95944	1.05901	0.025362	0.154295	0.0799881	0.258567		0.0995672	0.178579
r2t_990	43	1.00503	0.960518	1.05916	0.0250337	0.155175	0.0813471	0.256726		0.0986398	0.175379
r2t_990	44	1.00539	0.961609	1.0573	0.0244091	0.1555	0.0805924	0.256279		0.0956882	0.175687
r2t_990	45	1.00514	0.961652	1.05682	0.0245244	0.155458	0.081784	0.254658		0.0951685	0.172873
r2t_990	46	1.00499	0.961966	1.05796	0.0244999	0.155238	0.0830485	0.253982		0.0959952	0.170933
r2t_990	47	1.00502	0.962743	1.05689	0.0241041	0.156323	0.0836902	0.254578		0.0941506	0.170887
r2t_990	48	1.00537	0.963398	1.05644	0.0235918	0.156463	0.0836891	0.254136		0.0930439	0.170447
r2t_990	49	1.00503	0.963702	1.05534	0.0233418	0.156188	0.0839962	0.251543		0.0916374	0.167547
r2t_990	50	1.00514	0.963018	1.05384	0.0232833	0.156301	0.0845466	0.251091		0.0908267	0.166544
r2t_990	51	1.00489	0.964431	1.05161	0.0224911	0.155523	0.0839873	0.250116		0.0871796	0.166128
r2t_990	52	1.00476	0.964262	1.0519	0.0224551	0.155991	0.0847698	0.250656		0.0876428	0.165886
r2t_990	53	1.00484	0.964664	1.05214	0.0225117	0.155852	0.085105	0.247865		0.0874766	0.16276
r2t_990	54	1.00493	0.964699	1.05152	0.0222489	0.156924	0.0865039	0.248515		0.0868225	0.162011
r2t_990	55	1.00505	0.965238	1.05147	0.0220047	0.156531	0.086253	0.24835		0.0862349	0.162097
r2t_990	56	1.00509	0.965714	1.05131	0.0218944	0.157522	0.0879429	0.246372		0.0855928	0.158429
r2t_990	57	1.00533	0.966729	1.0516	0.021809	0.157153	0.0878179	0.245835		0.0848674	0.158017
r2t_990	58	1.00505	0.965995	1.05016	0.0215029	0.157783	0.0888795	0.247285		0.0841632	0.158405
r2t_990	59	1.00483	0.96656	1.04978	0.0212982	0.157202	0.0892583	0.244027		0.0832244	0.154769
r2t_990	60	1.00494	0.966779	1.04964	0.0210509	0.156653	0.0882863	0.242275		0.0828591	0.153989
r2t_990	61	1.00503	0.967259	1.04966	0.0210452	0.15734	0.0885128	0.243745		0.0824023	0.155232
r2t_990	62	1.00484	0.967605	1.04737	0.0203479	0.157331	0.0897724	0.242186		0.0797632	0.152414
r2t_990	63	1.00503	0.967767	1.04878	0.0205901	0.157639	0.0907374	0.241348		0.0810134	0.15061
r2t_990	64	1.00522	0.967267	1.04903	0.0207037	0.158579	0.0916708	0.242591		0.0817647	0.15092
r2t_990	65	1.00471	0.967866	1.04735	0.0202214	0.156958	0.0907584	0.240069		0.0794797	0.14931
r2t_990	66	1.00511	0.968556	1.04823	0.020378	0.157718	0.0912473	0.240704		0.0796772	0.149457
r2t_990	67	1.00555	0.968285	1.04812	0.020464	0.158918	0.0926921	0.242428		0.0798369	0.149736
r2t_990	68	1.00482	0.968835	1.04741	0.0198853	0.157768	0.0914699	0.240094		0.0785716	0.148624
r2t_990	69	1.00505	0.969786	1.04748	0.0197437	0.157723	0.0918057	0.238575		0.0776914	0.146769
r2t_990	70	1.00531	0.969845	1.04654	0.0196702	0.158326	0.0936217	0.238694		0.0766992	0.145072
r2t_990	71	1.00485	0.968872	1.04624	0.0195495	0.158031	0.0918045	0.236095		0.0773666	0.14429
r2t_990	72	1.00486	0.970058	1.04507	0.0192186	0.15813	0.0932465	0.237876		0.0750131	0.144629
r2t_990	73	1.00496	0.970339	1.04506	0.019008	0.15791	0.0940373	0.238017		0.0747157	0.14398
r2t_990	74	1.00533	0.971095	1.04584	0.0190568	0.159142	0.0939521	0.237778		0.0747429	0.143826
r2t_990	75	1.00497	0.970653	1.04443	0.0186676	0.158522	0.0932491	0.234971		0.0737765	0.141722
r2t_990	76	1.00485	0.969774	1.04334	0.0187044	0.158719	0.0942086	0.236265		0.0735679	0.142056
r2t_990	77	1.00478	0.970964	1.04467	0.018662	0.158271	0.0949158	0.234653		0.0737048	0.139738
r2t_990	78	1.00481	0.971419	1.04466	0.0186696	0.158529	0.0950243	0.23589		0.0732386	0.140865
r2t_990	79	1.00476	0.970666	1.04295	0.0184436	0.1584	0.0957674	0.233779		0.0722813	0.138012
r2t_990	80	1.00519	0.971469	1.04461	0.0184849	0.158473	0.0970866	0.233335		0.0731428	0.136248
r2t_990	81	1.00498	0.971446	1.04319	0.0181918	0.159462	0.0970231	0.233398		0.0717485	0.136375
r2t_990	82	1.00503	0.971712	1.04275	0.0182047	0.158988	0.0966349	0.232404		0.071039	0.135769
r2t_990	83	1.00501	0.972142	1.04298	0.0180044	0.159193	0.0968013	0.233463		0.0708346	0.136661
r2t_990	84	1.00504	0.972203	1.0432	0.0179849	0.159539	0.0963942	0.232735		0.0709978	0.13634
r2t_990	85	1.00511	0.972154	1.0433	0.0179807	0.159927	0.0979522	0.234447		0.0711459	0.136494
r2t_990	86	1.00502	0.972593	1.042	0.0175975	0.15919	0.0980727	0.231696		0.0694106	0.133623
r2t_990	87	1.00495	0.972796	1.0424	0.0177717	0.159289	0.0980849	0.231496		0.0696025	0.133411
r2t_990	88	1.00509	0.972754	1.04168	0.0176218	0.159145	0.0989477	0.229867		0.0689239	0.13092
r2t_990	89	1.00491	0.972954	1.0413	0.0174388	0.159511	0.0994025	0.230983		0.0683444	0.131581
r2t_990	90	1.0046	0.972772	1.03997	0.0171488	0.158314	0.0985528	0.228755		0.0671989	0.130202
r2t_990	91	1.00536	0.973745	1.04122	0.0172715	0.159978	0.0997433	0.229949		0.0674776	0.130206
r2t_990	92	1.00504	0.973063	1.0408	0.0170851	0.159287	0.0995989	0.227768		0.0677416	0.128169
r2t_990	93	1.005	0.974165	1.0409	0.0170765	0.159703	0.100512	0.22915		0.0667305	0.128638
r2t_990	94	1.00528	0.974623	1.04095	0.0169749	0.160296	0.100023	0.229241		0.0663232	0.129218
r2t_990	95	1.00488	0.974326	1.03934	0.0167671	0.159561	0.0997388	0.22852		0.065016	0.128781
r2t_990	96	1.00526	0.974621	1.03982	0.016748	0.159719	0.100635	0.22748		0.0652038	0.126845
r2t_990	97	1.00493	0.975102	1.03906	0.0165111	0.159773	0.102044	0.226975		0.0639629	0.124931
r2t_990	98	1.00488	0.97487	1.03911	0.0163867	0.15958	0.100432	0.228109		0.0642406	0.127677
r2t_990	99	1.00505	0.975051	1.03957	0.016629	0.160181	0.102027	0.227879		0.0645241	0.125852
r2t_990	100	1.00503	0.974608	1.03974	0.0165259	0.159446	0.101393	0.225539		0.0651281	0.124145
r2t_990	101	1.00507	0.975319	1.03847	0.0162545	0.160004	0.101926	0.227321		0.0631499	0.125394
r2t_990	102	1.00494	0.97517	1.03929	0.0162989	0.159941	0.101933	0.225512		0.064123	0.123579
r2t_990	103	1.00512	0.974965	1.03888	0.0161193	0.160536	0.103511	0.225675		0.0639182	0.122165
r2t_990	104	1.00503	0.975241	1.03802	0.0159743	0.160315	0.103514	0.225539		0.0627776	0.122025
r2t_990	105	1.005	0.975523	1.03796	0.0159074	0.160042	0.103475	0.22595		0.0624343	0.122475
r2t_990	106	1.00525	0.975811	1.03807	0.0158268	0.16028	0.103358	0.225203		0.0622635	0.121845
r2t_990	107	1.00495	0.97498	1.03877	0.0161066	0.16025	0.104392	0.224183		0.0637859	0.119791
r2t_990	108	1.00496	0.976033	1.03722	0.0155963	0.160135	0.104812	0.223411		0.061183	0.118599
r2t_990	109	1.00522	0.976581	1.03786	0.015789	0.16037	0.103655	0.224399		0.0612765	0.120744
r2t_990	110	1.00536	0.976275	1.03808	0.0157407	0.160853	0.105121	0.224408		0.0618077	0.119287
r2t_990	111	1.0051	0.97678	1.03698	0.0154595	0.160672	0.104484	0.223692		0.0602046	0.119208
r2t_990	112	1.00525	0.976828	1.03713	0.01543	0.160194	0.104529	0.222297		0.0603023	0.117768
r2t_990	113	1.00474	0.976499	1.0373	0.0155484	0.159945	0.105446	0.223494		0.060798	0.118048
r2t_990	114	1.00502	0.976561	1.03648	0.0153218	0.160533	0.104879	0.223244		0.0599143	0.118365
r2t_990	115	1.00511	0.977048	1.03646	0.0152788	0.160499	0.105717	0.223255		0.0594093	0.117538
r2t_990	116	1.00518	0.97694	1.0367	0.0152749	0.161088	0.106365	0.223027		0.0597626	0.116662
r2t_990	117	1.00519	0.977123	1.03585	0.0151256	0.160738	0.105083	0.222891		0.0587222	0.117808
r2t_990	118	1.00523	0.977415	1.03631	0.0150033	0.16067	0.106294	0.221461		0.058897	0.115168
r2t_990	119	1.00514	0.977325	1.03589	0.01497	0.161081	0.105822	0.222575		0.0585614	0.116753
r2t_990	120	1.00486	0.977302	1.03498	0.0148839	0.160119	0.104962	0.220743		0.0576828	0.115781
r2t_990	121	1.00519	0.977331	1.0356	0.0149298	0.1604	0.106173	0.220658		0.0582709	0.114485
r2t_990	122	1.00481	0.977431	1.03597	0.0149105	0.160117	0.106583	0.222249		0.0585436	0.115666
r2t_990	123	1.00499	0.977705	1.0362	0.0148695	0.161168	0.106424	0.221924		0.058492	0.115499
r2t_990	124	1.00514	0.977957	1.03621	0.0148165	0.160518	0.106766	0.220144		0.058257	0.113378
r2t_990	125	1.00533	0.978172	1.03554	0.0146731	0.161535	0.106975	0.221565		0.0573638	0.11459
r2t_990	126	1.00489	0.978173	1.03423	0.0143979	0.160062	0.106903	0.219994		0.0560618	0.113091
r2t_990	127	1.00484	0.978581	1.0345	0.0143558	0.160417	0.108393	0.219304		0.0559228	0.110911
r2t_990	128	1.00505	0.978547	1.03479	0.0144845	0.160623	0.108406	0.219724		0.056247	0.111317
r2t_990	129	1.00522	0.978458	1.03536	0.0144537	0.161129	0.108207	0.220049		0.0569034	0.111842
r2t_990	130	1.005	0.978569	1.03526	0.0144728	0.160584	0.108767	0.219224		0.0566919	0.110457
r2t_990	131	1.00519	0.978958	1.0352	0.0143889	0.161139	0.107929	0.219146		0.0562468	0.111217
r2t_990	132	1.00521	0.978889	1.03524	0.0144005	0.160821	0.108204	0.218697		0.0563512	0.110493
r2t_990	133	1.00503	0.978301	1.03507	0.0143189	0.161086	0.109902	0.219285		0.0567676	0.109382
r2t_990	134	1.00509	0.978935	1.03464	0.0141678	0.160773	0.108348	0.216906		0.0557003	0.108557
r2t_990	135	1.00516	0.979422	1.03488	0.0142383	0.161063	0.109196	0.21923		0.0554562	0.110035
r2t_990	136	1.0051	0.978781	1.03419	0.0141491	0.161502	0.108533	0.218603		0.0554045	0.11007
r2t_990	137	1.00503	0.978733	1.03409	0.0139616	0.161291	0.110322	0.218527		0.0553527	0.108205
r2t_990	138	1.00529	0.978967	1.03424	0.0140958	0.161683	0.110016	0.218819		0.0552728	0.108803
r2t_990	139	1.00512	0.979417	1.03377	0.0139011	0.161248	0.110271	0.217957		0.0543572	0.107686
r2t_990	140	1.00492	0.979349	1.03372	0.013701	0.161224	0.110087	0.219143		0.0543739	0.109056
r2t_990	141	1.00506	0.979748	1.03348	0.013813	0.161162	0.109968	0.218172		0.0537362	0.108204
r2t_990	142	1.00498	0.979727	1.03324	0.0137712	0.161231	0.111096	0.217626		0.0535126	0.10653
r2t_990	143	1.00502	0.979557	1.03333	0.0136434	0.160951	0.1104	0.217073		0.0537742	0.106673
r2t_990	144	1.00498	0.979449	1.03324	0.013704	0.161074	0.111406	0.216917		0.0537882	0.105511
r2t_990	145	1.00503	0.980205	1.03309	0.0136455	0.161341	0.109684	0.21603		0.0528833	0.106346
r2t_990	146	1.00499	0.979931	1.03309	0.0135229	0.161138	0.111226	0.216529		0.0531543	0.105303
r2t_990	147	1.00513	0.98	1.03278	0.0135077	0.161287	0.111719	0.216634		0.0527785	0.104915
r2t_990	148	1.00497	0.979326	1.0328	0.0135763	0.160827	0.110915	0.216261		0.053475	0.105345
r2t_990	149	1.00482	0.979956	1.03246	0.0133663	0.160824	0.111026	0.216626		0.0525004	0.105601
r2t_990	150	1.00486	0.980481	1.03189	0.0132713	0.160946	0.111314	0.2145		0.0514053	0.103186
r2t_990	151	1.00504	0.979617	1.03277	0.0134712	0.161295	0.111428	0.215981		0.0531526	0.104553
r2t_990	152	1.00508	0.980741	1.03219	0.0131835	0.16145	0.111862	0.216803		0.0514456	0.104941
r2t_990	153	1.0052	0.98009	1.03277	0.0133857	0.161659	0.111684	0.215296		0.0526839	0.103612
r2t_990	154	1.00531	0.980515	1.03302	0.0133755	0.161634	0.112911	0.214885		0.0525072	0.101973
r2t_990	155	1.00518	0.981188	1.0323	0.0130873	0.161581	0.112354	0.215734		0.0511121	0.10338
r2t_990	156	1.00496	0.980955	1.03206	0.0130538	0.160991	0.112686	0.213892		0.0511043	0.101206
r2t_990	157	1.00487	0.981007	1.03159	0.0130439	0.161459	0.113542	0.215282		0.0505849	0.10174
r2t_990	158	1.00535	0.980672	1.03208	0.0131047	0.161616	0.113237	0.215473		0.0514083	0.102237
r2t_990	159	1.00502	0.980579	1.03135	0.0129406	0.161166	0.112591	0.213875		0.0507719	0.101284
r2t_990	160	1.00522	0.981217	1.03201	0.0130052	0.161954	0.113027	0.214375		0.0507892	0.101348
r2t_990	161	1.00508	0.980805	1.03187	0.0129808	0.16161	0.113316	0.213827		0.0510681	0.100511
r2t_990	162	1.00532	0.981708	1.03193	0.0129412	0.161741	0.114337	0.214138		0.0502216	0.0998005
r2t_990	163	1.00501	0.98119	1.031	0.0127771	0.161193	0.114209	0.213151		0.0498108	0.0989422
r2t_990	164	1.00515	0.981087	1.03172	0.0128546	0.161791	0.113082	0.213213		0.0506342	0.100131
r2t_990	165	1.00504	0.981125	1.03183	0.0129625	0.161605	0.113516	0.214064		0.0507045	0.100548
r2t_990	166	1.00505	0.9812	1.03108	0.0128221	0.161359	0.11478	0.212999		0.0498806	0.0982194
r2t_990	167	1.00516	0.981563	1.03093	0.0125715	0.161473	0.114074	0.212595		0.0493674	0.0985213
r2t_990	168	1.00522	0.981586	1.03177	0.0128352	0.162015	0.113929	0.214577		0.0501871	0.100648
r2t_990	169	1.00508	0.981433	1.03105	0.0126122	0.161697	0.114566	0.212818		0.0496154	0.0982513
r2t_990	170	1.00491	0.981605	1.02983	0.0124697	0.161506	0.114657	0.2129		0.0482267	0.0982423
r2t_990	171	1.00512	0.981141	1.03078	0.0126601	0.161562	0.114591	0.212806		0.0496425	0.0982153
r2t_990	172	1.00523	0.981658	1.03117	0.0125178	0.161946	0.115136	0.212969		0.0495106	0.0978324
r2t_990	173	1.00519	0.982307	1.0311	0.0124696	0.161641	0.11478	0.212149		0.0487928	0.0973694
r2t_990	174	1.00528	0.982029	1.03114	0.0125195	0.161516	0.11531	0.212497		0.0491065	0.0971871
r2t_990	175	1.00498	0.981436	1.03042	0.012484	0.161953	0.115825	0.213439		0.04898	0.0976138
r2t_990	176	1.00496	0.982303	1.03045	0.0123476	0.161418	0.114911	0.211976		0.0481488	0.0970655
r2t_990	177	1.00525	0.981982	1.03037	0.0123371	0.16224	0.116505	0.211827		0.0483854	0.0953227
r2t_990	178	1.005	0.98222	1.03063	0.0124317	0.161743	0.115618	0.210682		0.0484077	0.0950642
r2t_990	179	1.00499	0.982539	1.02941	0.0120653	0.161628	0.116227	0.21023		0.0468736	0.0940033
r2t_990	180	1.00519	0.98264	1.03142	0.0122858	0.161805	0.116139	0.212019		0.0487765	0.0958807
r2t_990	181	1.00519	0.982677	1.03025	0.0121745	0.161981	0.11596	0.211295		0.0475752	0.0953349
r2t_990	182	1.0051	0.982207	1.03012	0.0122529	0.162065	0.116086	0.211296		0.0479166	0.0952093
r2t_990	183	1.00492	0.982391	1.03011	0.012222	0.161557	0.116714	0.210464		0.0477169	0.0937503
r2t_990	184	1.00522	0.982345	1.03045	0.0121628	0.161972	0.116264	0.210302		0.0481025	0.0940382
r2t_990	185	1.00499	0.982511	1.02996	0.0120409	0.161838	0.116723	0.21078		0.0474507	0.0940571
r2t_990	186	1.00508	0.982766	1.02986	0.0120175	0.16211	0.118494	0.2105		0.0470931	0.0920056
r2t_990	187	1.00505	0.982746	1.02975	0.0119843	0.161979	0.11707	0.209897		0.0470041	0.0928269
r2t_990	188	1.00524	0.982857	1.02965	0.011904	0.162097	0.116882	0.210666		0.0467956	0.093784
r2t_990	189	1.0052	0.982518	1.02983	0.0119689	0.161912	0.116902	0.209802		0.0473156	0.0928994
r2t_990	190	1.00499	0.983011	1.02892	0.0118194	0.16184	0.117266	0.209311		0.0459134	0.0920455
r2t_990	191	1.00501	0.982768	1.02913	0.0118691	0.161843	0.11832	0.21075		0.0463589	0.09243
r2t_990	192	1.00493	0.982573	1.02904	0.0118512	0.161577	0.117089	0.210127		0.0464633	0.0930381
r2t_990	193	1.00497	0.98198	1.02926	0.0120037	0.162023	0.118175	0.209863		0.0472833	0.0916877
r2t_990	194	1.00508	0.982572	1.02964	0.0119088	0.161744	0.117093	0.209648		0.047072	0.0925547
r2t_990	195	1.00496	0.982899	1.02909	0.0117088	0.161662	0.117268	0.209334		0.0461911	0.0920658
r2t_990	196	1.00503	0.983167	1.02876	0.0116056	0.162189	0.117853	0.209983		0.0455966	0.0921299
r2t_990	197	1.00506	0.983326	1.02887	0.0115917	0.161948	0.118668	0.209123		0.0455455	0.090455
r2t_990	198	1.00498	0.983136	1.028	0.0114988	0.162041	0.118047	0.209148		0.044865	0.0911013
r2t_990	199	1.00508	0.982849	1.02912	0.0117118	0.162169	0.119115	0.209178		0.0462667	0.0900632
r2t_990	200	1.00506	0.983631	1.02889	0.0115585	0.161939	0.118234	0.20836		0.0452623	0.090126
r2t_990	201	1.00521	0.983546	1.02885	0.0115692	0.16199	0.117831	0.208663		0.0453052	0.090832
r2t_990	202	1.00501	0.983285	1.02863	0.0115319	0.16209	0.118963	0.208289		0.045343	0.089326
r2t_990	203	1.00514	0.983335	1.02888	0.0116512	0.16204	0.118967	0.208529		0.0455423	0.0895626
r2t_990	204	1.0051	0.983291	1.02861	0.0114894	0.162001	0.118306	0.208834		0.045323	0.0905285
r2t_990	205	1.00515	0.983614	1.02922	0.0115808	0.1619	0.11884	0.207974		0.0456077	0.0891343
r2t_990	206	1.00504	0.983785	1.0283	0.0113067	0.162079	0.11949	0.208653		0.0445193	0.0891634
r2t_990	207	1.00497	0.983309	1.02808	0.0114224	0.162086	0.118186	0.208096		0.044773	0.0899093
r2t_990	208	1.0052	0.983555	1.02843	0.0114786	0.162084	0.119469	0.20819		0.0448724	0.0887205
r2t_990	209	1.00513	0.984287	1.02869	0.0113358	0.162377	0.11993	0.207609		0.0443991	0.0876796
r2t_990	210	1.00506	0.984052	1.02765	0.0110946	0.162261	0.120175	0.208068		0.0435943	0.0878938
r2t_990	211	1.00511	0.984461	1.0283	0.0112798	0.16202	0.119576	0.208658		0.0438427	0.0890812
r2t_990	212	1.00523	0.984433	1.02835	0.0113103	0.162142	0.119465	0.207871		0.0439158	0.0884063
r2t_990	213	1.00501	0.983803	1.02806	0.0111616	0.162169	0.119583	0.207301		0.0442562	0.0877177
r2t_990	214	1.00499	0.983748	1.02839	0.0112985	0.162014	0.11941	0.208307		0.0446468	0.0888964
r2t_990	215	1.00527	0.984252	1.028	0.0111194	0.162218	0.119991	0.20784		0.0437509	0.0878488
r2t_990	216	1.00513	0.983964	1.02796	0.011145	0.162286	0.120305	0.207163		0.0439952	0.0868578
r2t_990	217	1.00519	0.984216	1.02765	0.0112189	0.162627	0.120025	0.207696		0.0434324	0.0876707
r2t_990	218	1.00502	0.983993	1.02768	0.0109952	0.161929	0.120007	0.2068		0.0436861	0.0867933
r2t_990	219	1.00515	0.984196	1.02772	0.0111453	0.162144	0.120886	0.206774		0.043526	0.0858881
r2t_990	220	1.00498	0.98398	1.02747	0.0110937	0.162154	0.119826	0.207661		0.0434897	0.0878352
r2t_990	221	1.00496	0.984448	1.02752	0.0110108	0.162469	0.12067	0.207748		0.0430769	0.0870775
r2t_990	222	1.00498	0.984473	1.02754	0.010962	0.162187	0.120622	0.206538		0.0430721	0.0859166
r2t_990	223	1.00514	0.984357	1.02723	0.0108923	0.162159	0.120799	0.20698		0.0428749	0.0861808
r2t_990	224	1.00488	0.984674	1.02732	0.0109644	0.161931	0.121113	0.205867		0.0426447	0.0847543
r2t_990	225	1.00507	0.984492	1.02694	0.0108844	0.162338	0.120767	0.206711		0.0424457	0.0859447
r2t_990	226	1.00514	0.984891	1.02723	0.0108587	0.162116	0.121345	0.20661		0.0423345	0.0852652
r2t_990	227	1.005	0.984675	1.02687	0.0108487	0.162095	0.120432	0.20632		0.0421954	0.0858879
r2t_990	228	1.00504	0.984664	1.02725	0.0108046	0.16198	0.120659	0.206126		0.0425807	0.0854671
r2t_990	229	1.00502	0.984884	1.02735	0.0108501	0.162133	0.121245	0.206975		0.0424619	0.0857299
r2t_990	230	1.00496	0.9846	1.02651	0.0108288	0.16213	0.122026	0.205491		0.0419116	0.0834645
r2t_990	231	1.0049	0.98444	1.02715	0.0107855	0.16223	0.121529	0.206673		0.0427056	0.0851445
r2t_990	232	1.00497	0.984716	1.02669	0.0106392	0.162162	0.121947	0.205866		0.0419784	0.083919
r2t_990	233	1.00506	0.985007	1.0271	0.010665	0.162439	0.121828	0.205384		0.0420942	0.0835556
r2t_990	234	1.00499	0.984737	1.02719	0.0107295	0.162339	0.121911	0.205638		0.0424533	0.0837271
r2t_990	235	1.00499	0.984419	1.02692	0.0107967	0.162265	0.121359	0.206009		0.0424986	0.0846496
r2t_990	236	1.00496	0.985069	1.02698	0.010671	0.162599	0.121983	0.205788		0.0419069	0.0838051
r2t_990	237	1.00506	0.98495	1.02646	0.0105602	0.162181	0.121753	0.206014		0.0415099	0.0842605
r2t_990	238	1.005	0.985058	1.02665	0.0105712	0.161846	0.120666	0.20457		0.0415961	0.0839038
r2t_990	239	1.00525	0.985182	1.02716	0.0107405	0.162662	0.121884	0.205738		0.0419777	0.0838534
r2t_990	240	1.00521	0.985318	1.02659	0.0105691	0.162338	0.121553	0.205256		0.0412702	0.0837027
r2t_990	241	1.0051	0.985604	1.02716	0.0105624	0.162188	0.121989	0.205277		0.0415564	0.0832882
r2t_990	242	1.00498	0.985162	1.02622	0.0105692	0.162109	0.121795	0.206122		0.0410554	0.0843265
r2t_990	243	1.00509	0.984914	1.02677	0.0106001	0.162336	0.122242	0.205452		0.0418565	0.08321
r2t_990	244	1.00509	0.985508	1.02664	0.0104888	0.162298	0.122292	0.20537		0.0411292	0.0830783
r2t_990	245	1.00494	0.985219	1.0266	0.0105548	0.162049	0.122623	0.20387		0.0413818	0.0812471
r2t_990	246	1.00512	0.985233	1.0262	0.0104215	0.162348	0.122704	0.204409		0.0409713	0.0817047
r2t_990	247	1.00504	0.985197	1.02633	0.0105307	0.162391	0.122542	0.205305		0.0411293	0.0827628
r2t_990	248	1.00497	0.985501	1.02619	0.0103876	0.162181	0.122209	0.204338		0.0406846	0.0821287
r2t_990	249	1.0051	0.985709	1.02652	0.0103692	0.16231	0.12335	0.205265		0.0408095	0.0819151
r2t_990	250	1.00506	0.985664	1.02656	0.0105224	0.162392	0.122837	0.203887		0.0408914	0.0810503
r2t_990	251	1.00517	0.985715	1.02684	0.0105337	0.16274	0.123362	0.20456		0.0411302	0.0811984
r2t_990	252	1.00502	0.985888	1.02566	0.0102683	0.162683	0.123307	0.203831		0.039769	0.0805232
r2t_990	253	1.005	0.985912	1.02585	0.0100802	0.162408	0.123736	0.204037		0.0399351	0.0803017
r2t_990	254	1.00506	0.985843	1.02601	0.0103421	0.162452	0.123548	0.204438		0.0401717	0.0808904
r2t_990	255	1.00522	0.985279	1.02649	0.0103987	0.162733	0.122862	0.204299		0.0412064	0.081438
r2t_990	256	1.00501	0.985441	1.02563	0.0102884	0.162459	0.123757	0.203396		0.0401894	0.0796386
r2t_990	257	1.00488	0.985849	1.02599	0.0102706	0.162337	0.122691	0.204201		0.0401422	0.0815103
r2t_990	258	1.00505	0.985721	1.02606	0.0103207	0.162521	0.122687	0.203911		0.0403431	0.081224
r2t_990	259	1.00502	0.985972	1.02584	0.0102684	0.162151	0.123101	0.203729		0.0398685	0.0806287
r2t_990	260	1.00498	0.985617	1.02575	0.0102032	0.162432	0.122475	0.203753		0.0401349	0.0812783
r2t_990	261	1.00522	0.985704	1.02631	0.0101518	0.162374	0.123359	0.202913		0.0406047	0.0795544
r2t_990	262	1.00489	0.986068	1.02563	0.0101303	0.162267	0.124161	0.20341		0.0395666	0.0792486
r2t_990	263	1.00516	0.985792	1.02545	0.0101308	0.162653	0.123908	0.20313		0.0396592	0.0792217
r2t_990	264	1.00519	0.985931	1.0262	0.0101859	0.162361	0.123659	0.203624		0.0402736	0.0799649
r2t_990	265	1.0052	0.986439	1.02552	0.0100291	0.162822	0.124977	0.202871		0.0390801	0.0778935
r2t_990	266	1.00479	0.985609	1.02508	0.0100834	0.162112	0.124242	0.203807		0.0394729	0.0795644
r2t_990	267	1.00517	0.986067	1.02593	0.0100473	0.162549	0.124447	0.203327		0.0398588	0.0788807
r2t_990	268	1.00516	0.985972	1.0254	0.010079	0.162464	0.12448	0.202735		0.0394281	0.0782549
r2t_990	269	1.00502	0.986372	1.02526	0.00987318	0.162348	0.124538	0.20272		0.0388845	0.0781819
r2t_990	270	1.00506	0.986367	1.02595	0.0100782	0.162575	0.124011	0.203003		0.0395801	0.0789912
r2t_990	271	1.00526	0.986493	1.02587	0.0100152	0.162919	0.124477	0.202945		0.039376	0.0784682
r2t_990	272	1.00497	0.986298	1.02539	0.00995903	0.162396	0.124418	0.203074		0.0390959	0.0786555
r2t_990	273	1.00507	0.986472	1.02511	0.00989121	0.162403	0.124428	0.202453		0.038635	0.0780245
r2t_990	274	1.00506	0.986255	1.02532	0.00990916	0.162499	0.124258	0.203161		0.0390625	0.0789031
r2t_990	275	1.00501	0.986283	1.02579	0.00997784	0.162494	0.125097	0.20229		0.0395033	0.0771927
r2t_990	276	1.00493	0.986545	1.02484	0.00976517	0.162229	0.124192	0.202517		0.0382912	0.0783249
r2t_990	277	1.00509	0.986614	1.02562	0.00990297	0.162595	0.125206	0.202783		0.0390085	0.0775774
r2t_990	278	1.00495	0.986491	1.02498	0.00977314	0.162382	0.124151	0.202746		0.0384911	0.0785953
r2t_990	279	1.00505	0.986706	1.02539	0.00981961	0.162394	0.125762	0.202614		0.0386839	0.0768518
r2t_990	280	1.00499	0.98672	1.02484	0.00972521	0.162302	0.124968	0.200964		0.0381219	0.0759954
r2t_990	281	1.00509	0.986469	1.02506	0.0098845	0.162713	0.125389	0.203104		0.0385876	0.0777144
r2t_990	282	1.00482	0.986427	1.02459	0.00972494	0.162157	0.124488	0.202216		0.0381652	0.0777279
r2t_990	283	1.00512	0.986547	1.025	0.00985019	0.162774	0.12566	0.202634		0.0384491	0.0769746
r2t_990	284	1.00498	0.986406	1.02487	0.00980269	0.162392	0.125436	0.200974		0.0384676	0.0755387
r2t_990	285	1.00502	0.986793	1.0252	0.00975417	0.162468	0.124391	0.203043		0.0384046	0.0786512
r2t_990	286	1.00499	0.986577	1.02467	0.00976268	0.162562	0.124652	0.201488		0.0380936	0.0768367
r2t_990	287	1.00507	0.986581	1.0249	0.00967289	0.162429	0.124791	0.201975		0.0383161	0.077184
r2t_990	288	1.00508	0.987078	1.02456	0.00958535	0.162656	0.125905	0.202216		0.0374849	0.0763119
r2t_990	289	1.00514	0.986791	1.02455	0.00958315	0.16293	0.126183	0.20306		0.0377577	0.0768765
r2t_990	290	1.00506	0.987025	1.02502	0.00965827	0.162644	0.124907	0.202429		0.0379984	0.0775214
r2t_990	291	1.00493	0.987097	1.02405	0.00955143	0.162206	0.126281	0.199748		0.0369518	0.0734665
r2t_990	292	1.00511	0.987076	1.02453	0.0096055	0.16299	0.125792	0.203269		0.0374569	0.0774768
r2t_990	293	1.00495	0.986979	1.02435	0.00957802	0.162486	0.126438	0.200198		0.0373686	0.07376
r2t_990	294	1.00496	0.986943	1.02394	0.00946753	0.162395	0.1266	0.200538		0.0369965	0.0739381
r2t_990	295	1.00494	0.986677	1.02435	0.00958856	0.162573	0.126245	0.201174		0.0376711	0.0749289
r2t_990	296	1.00508	0.986991	1.02431	0.0095088	0.162486	0.126046	0.201518		0.0373196	0.0754721
r2t_990	297	1.00501	0.986828	1.02456	0.00954907	0.16222	0.126553	0.201446		0.0377365	0.074893
r2t_990	298	1.00514	0.987228	1.02455	0.00952221	0.162736	0.125827	0.20127		0.0373233	0.0754429
r2t_990	299	1.00495	0.987299	1.02441	0.00944332	0.162246	0.126149	0.200323		0.037107	0.0741738
r2t_990	300	1.00501	0.987181	1.02389	0.00945285	0.162417	0.126042	0.200089		0.0367078	0.0740468
r2t_990	301	1.00527	0.987505	1.02441	0.0094433	0.163088	0.126782	0.200746		0.0369065	0.0739638
r2t_990	302	1.00507	0.98714	1.02423	0.00940465	0.162811	0.126807	0.201062		0.03709	0.0742542
r2t_990	303	1.00512	0.987487	1.02351	0.00929407	0.16296	0.127128	0.201309		0.0360196	0.0741817
r2t_990	304	1.00507	0.987295	1.02419	0.00940315	0.162651	0.126979	0.200236		0.0368982	0.0732569
r2t_990	305	1.00507	0.987182	1.02378	0.00934547	0.162788	0.126659	0.201071		0.0366007	0.0744129
r2t_990	306	1.00512	0.987271	1.02394	0.00940236	0.162888	0.127493	0.201386		0.0366727	0.0738931
r2t_990	307	1.00505	0.98697	1.0239	0.00938207	0.162696	0.127093	0.200451		0.0369331	0.073358
r2t_990	308	1.005	0.987674	1.02409	0.0092631	0.162844	0.126371	0.200426		0.0364122	0.0740543
r2t_990	309	1.00518	0.98765	1.02397	0.00929135	0.162975	0.126579	0.201289		0.0363195	0.0747099
r2t_990	310	1.00503	0.987522	1.02395	0.00934636	0.162637	0.127393	0.200584		0.0364234	0.0731912
r2t_990	311	1.00505	0.987439	1.02403	0.00928652	0.162801	0.127574	0.200299		0.0365893	0.0727247
r2t_990	312	1.00506	0.987441	1.02334	0.00919786	0.162738	0.126808	0.199927		0.0359039	0.0731183
r2t_990	313	1.00482	0.987568	1.02358	0.00928948	0.162583	0.127735	0.200549		0.0360082	0.0728138
r2t_990	314	1.00521	0.987726	1.02401	0.00928297	0.163086	0.127127	0.200234		0.0362805	0.0731063
r2t_990	315	1.00515	0.987413	1.02376	0.0092559	0.163	0.127219	0.20097		0.0363438	0.0737512
r2t_990	316	1.00521	0.987768	1.02373	0.00912783	0.162794	0.127497	0.199555		0.0359614	0.0720579
r2t_990	317	1.00517	0.987365	1.02398	0.00918469	0.163149	0.127707	0.200939		0.0366187	0.0732324
r2t_990	318	1.0051	0.987648	1.02399	0.00925249	0.162851	0.127423	0.200526		0.0363449	0.073103
r2t_990	319	1.00502	0.987817	1.02361	0.00911577	0.162646	0.127466	0.199613		0.0357941	0.0721471
r2t_990	320	1.00497	0.98766	1.02381	0.00918947	0.162486	0.127524	0.200138		0.0361544	0.0726135
r2t_990	321	1.00503	0.987938	1.0235	0.00904062	0.162461	0.127934	0.199314		0.0355638	0.0713802
r2t_990	322	1.00496	0.987626	1.02374	0.0090828	0.162533	0.128121	0.199172		0.0361188	0.0710511
r2t_990	323	1.00491	0.987773	1.02366	0.00911816	0.162596	0.127342	0.19957		0.0358902	0.0722276
r2t_990	324	1.0051	0.988078	1.02369	0.00913302	0.162567	0.127097	0.199594		0.0356128	0.0724971
r2t_990	325	1.00502	0.987694	1.024	0.00924866	0.162871	0.127809	0.199823		0.0363108	0.0720136
r2t_990	326	1.00506	0.987995	1.0234	0.00907516	0.162735	0.126926	0.199759		0.0354024	0.0728329
r2t_990	327	1.00505	0.98832	1.02292	0.008961	0.162976	0.127606	0.19994		0.0346025	0.0723336
r2t_990	328	1.00485	0.987533	1.0232	0.00908096	0.162669	0.127378	0.199183		0.0356686	0.071805
r2t_990	329	1.00494	0.988115	1.02299	0.00898717	0.162558	0.127177	0.198963		0.0348735	0.0717862
r2t_990	330	1.00508	0.987863	1.02305	0.0089332	0.162847	0.127946	0.199307		0.0351866	0.0713609
r2t_990	331	1.00509	0.987959	1.02358	0.00907064	0.162703	0.12757	0.198666		0.0356232	0.0710953
r2t_990	332	1.00497	0.987832	1.02299	0.00903028	0.162581	0.127417	0.199163		0.0351532	0.0717459
r2t_990	333	1.00471	0.987754	1.0231	0.00902013	0.16244	0.128267	0.198133		0.0353499	0.0698661
r2t_990	334	1.0051	0.987898	1.02326	0.00903893	0.162766	0.127752	0.199913		0.0353599	0.0721605
r2t_990	335	1.00514	0.988268	1.0233	0.00902028	0.163063	0.128377	0.198735		0.035031	0.0703587
r2t_990	336	1.00493	0.98827	1.02296	0.00884971	0.162656	0.128763	0.199254		0.0346848	0.0704912
r2t_990	337	1.0053	0.988196	1.02324	0.00891423	0.163076	0.128664	0.199214		0.0350477	0.0705491
r2t_990	338	1.00507	0.987912	1.02315	0.0089158	0.162697	0.128657	0.199042		0.0352372	0.0703847
r2t_990	339	1.00505	0.988224	1.02334	0.00895786	0.16255	0.128683	0.198999		0.0351115	0.0703163
r2t_990	340	1.00499	0.988044	1.02286	0.0089226	0.162936	0.129166	0.199202		0.0348158	0.0700358
r2t_990	341	1.00501	0.988238	1.02319	0.00892147	0.162761	0.128853	0.198856		0.0349568	0.0700035
r2t_990	342	1.00524	0.988353	1.02343	0.00894129	0.16304	0.128955	0.198042		0.0350767	0.0690873
r2t_990	343	1.00502	0.987808	1.02309	0.00890145	0.162798	0.128696	0.19844		0.0352823	0.0697444
r2t_990	344	1.00509	0.988386	1.02328	0.00887641	0.163104	0.129465	0.19853		0.0348977	0.0690653
r2t_990	345	1.00497	0.988241	1.02292	0.00880522	0.16277	0.128774	0.198405		0.0346779	0.0696314
r2t_990	346	1.0052	0.988351	1.0229	0.00888085	0.162998	0.129029	0.198324		0.0345503	0.0692946
r2t_990	347	1.00496	0.987866	1.02245	0.00876862	0.162426	0.128818	0.196988		0.034589	0.0681697
r2t_990	348	1.005	0.988449	1.02313	0.00879929	0.162722	0.128788	0.198041		0.0346838	0.0692526
r2t_990	349	1.0051	0.98794	1.02318	0.00887039	0.163109	0.12955	0.19923		0.0352424	0.0696807
r2t_990	350	1.00511	0.988523	1.02342	0.00879907	0.163139	0.129154	0.198931		0.0348919	0.0697771
r2t_990	351	1.00522	0.988941	1.02296	0.00873422	0.162857	0.129456	0.19878		0.034014	0.0693236
r2t_990	352	1.00513	0.988402	1.02332	0.00884528	0.162872	0.128785	0.198034		0.0349215	0.0692487
r2t_990	353	1.00507	0.988741	1.02281	0.00871025	0.162778	0.129654	0.197704		0.0340643	0.06805
r2t_990	354	1.00516	0.988847	1.02303	0.00873536	0.163073	0.130207	0.198636		0.0341806	0.0684288
r2t_990	355	1.00507	0.989039	1.02266	0.00865351	0.163004	0.129329	0.198319		0.0336213	0.0689908
r2t_990	356	1.00494	0.988177	1.02228	0.00866007	0.162804	0.129256	0.197689		0.0341054	0.0684331
r2t_990	357	1.00512	0.988659	1.02279	0.00873598	0.162846	0.129555	0.198604		0.0341281	0.0690482
r2t_990	358	1.00514	0.988354	1.02278	0.00871521	0.163277	0.129463	0.19804		0.0344235	0.0685775
r2t_990	359	1.00502	0.988502	1.02267	0.00872741	0.162594	0.128536	0.198313		0.0341682	0.0697775
r2t_990	360	1.0051	0.988637	1.02257	0.00870715	0.163004	0.12939	0.198549		0.0339311	0.0691584
r2t_990	361	1.00515	0.98851	1.02307	0.00878596	0.16291	0.129678	0.197609		0.0345645	0.0679309
r2t_990	362	1.00486	0.988724	1.02207	0.00853008	0.162416	0.130011	0.196735		0.0333482	0.0667244
r2t_990	363	1.00512	0.988873	1.02258	0.00857242	0.162852	0.129532	0.197633		0.0337063	0.068101
r2t_990	364	1.00518	0.988788	1.02241	0.00854122	0.163045	0.129756	0.197814		0.033626	0.068058
r2t_990	365	1.00512	0.988876	1.02234	0.00858536	0.163112	0.130134	0.198101		0.033465	0.067967
r2t_990	366	1.00502	0.988888	1.02274	0.00858823	0.163002	0.129794	0.197973		0.0338557	0.068179
r2t_990	367	1.00507	0.988394	1.02275	0.00860753	0.163061	0.129867	0.19792		0.0343555	0.0680535
r2t_990	368	1.00496	0.988332	1.02189	0.00848099	0.162823	0.12936	0.196785		0.0335566	0.0674254
r2t_990	369	1.00515	0.989043	1.0223	0.00847268	0.162964	0.130451	0.197524		0.0332613	0.0670735
r2t_990	370	1.00508	0.988786	1.02226	0.0085428	0.163112	0.130922	0.197694		0.0334781	0.0667723
r2t_990	371	1.00506	0.988864	1.02236	0.00850863	0.162997	0.130223	0.19696		0.0334918	0.0667373
r2t_990	372	1.00496	0.988901	1.02199	0.00851811	0.162754	0.129443	0.197047		0.0330855	0.0676038
r2t_990	373	1.00512	0.988605	1.022	0.00845888	0.162957	0.130286	0.196985		0.033399	0.0666989
r2t_990	374	1.00519	0.989255	1.02249	0.00844244	0.162927	0.130299	0.197739		0.0332349	0.0674397
r2t_990	375	1.0051	0.98888	1.02241	0.00845139	0.163007	0.130369	0.197449		0.0335287	0.0670799
r2t_990	376	1.00512	0.988837	1.02239	0.00853107	0.163124	0.130307	0.197591		0.033553	0.0672846
r2t_990	377	1.00512	0.989187	1.02207	0.0084214	0.163169	0.130016	0.197421		0.0328801	0.0674053
r2t_990	378	1.00496	0.988915	1.02209	0.00848588	0.162865	0.130197	0.197252		0.0331714	0.0670557
r2t_990	379	1.00505	0.98912	1.02183	0.0083548	0.163124	0.130617	0.197225		0.0327132	0.0666085
r2t_990	380	1.00514	0.989573	1.02256	0.00835798	0.163135	0.130503	0.19687		0.0329857	0.0663677
r2t_990	381	1.00513	0.98901	1.02249	0.00848554	0.163077	0.130648	0.196324		0.0334817	0.0656759
r2t_990	382	1.00504	0.989472	1.0224	0.00841667	0.163212	0.130542	0.197468		0.0329329	0.0669258
r2t_990	383	1.00506	0.989069	1.02226	0.00848012	0.162731	0.130052	0.196054		0.03319	0.0660013
r2t_990	384	1.00493	0.989124	1.02191	0.00829512	0.162648	0.13052	0.195932		0.0327897	0.0654116
r2t_990	385	1.00497	0.98864	1.02208	0.00848254	0.162981	0.130802	0.196959		0.0334388	0.0661569
r2t_990	386	1.00501	0.989344	1.02149	0.00827408	0.162823	0.130529	0.196428		0.0321429	0.0658994
r2t_990	387	1.0052	0.989399	1.02244	0.00832741	0.163174	0.130732	0.197807		0.0330405	0.0670743
r2t_990	388	1.00515	0.989561	1.02216	0.00831527	0.163322	0.131242	0.197135		0.0326027	0.0658931
r2t_990	389	1.00512	0.989402	1.02178	0.0083188	0.162949	0.130828	0.196791		0.0323764	0.0659636
r2t_990	390	1.00519	0.989377	1.02194	0.00835844	0.163033	0.130957	0.196997		0.0325666	0.0660396
r2t_990	391	1.0051	0.989233	1.02145	0.00823069	0.163016	0.131573	0.195851		0.0322169	0.0642771
r2t_990	392	1.00509	0.989204	1.02176	0.00832914	0.162846	0.130807	0.195897		0.0325534	0.0650909
r2t_990	393	1.00512	0.989413	1.02163	0.00824351	0.163228	0.131391	0.196315		0.0322162	0.0649241
r2t_990	394	1.00505	0.989619	1.02169	0.00824971	0.163036	0.130896	0.195502		0.0320713	0.0646059
r2t_990	395	1.00505	0.989546	1.02187	0.00824994	0.162785	0.130812	0.196213		0.0323226	0.0654015
r2t_990	396	1.00486	0.989266	1.02188	0.00830675	0.16282	0.131206	0.195531		0.0326139	0.0643251
r2t_990	397	1.00497	0.989277	1.02154	0.00819139	0.162695	0.130985	0.195903		0.0322621	0.0649174
r2t_990	398	1.00505	0.98928	1.0216	0.00823089	0.162779	0.131402	0.196701		0.0323159	0.0652987
r2t_990	399	1.00503	0.989437	1.02156	0.00824547	0.162787	0.130906	0.195976		0.0321217	0.0650694
r2t_990	400	1.00514	0.989859	1.02142	0.00810425	0.163098	0.131684	0.196338		0.0315645	0.0646539
r2t_990	401	1.0051	0.989356	1.02179	0.00828144	0.162957	0.131459	0.195568		0.0324368	0.0641087
r2t_990	402	1.00504	0.989402	1.02132	0.00819534	0.162945	0.131777	0.195951		0.0319223	0.0641736
r2t_990	403	1.00511	0.989722	1.02163	0.00818876	0.163075	0.131547	0.195629		0.0319124	0.064082
r2t_990	404	1.00503	0.989714	1.02151	0.00810027	0.162906	0.131455	0.196354		0.0318002	0.0648992
r2t_990	405	1.00497	0.98916	1.02166	0.00819565	0.162842	0.131178	0.195677		0.0324961	0.0644989
r2t_990	406	1.00501	0.989501	1.02163	0.00814819	0.162922	0.131421	0.195252		0.0321265	0.0638313
r2t_990	407	1.00502	0.989796	1.02133	0.00812105	0.162943	0.131692	0.196019		0.0315324	0.064327
r2t_990	408	1.00506	0.989477	1.02183	0.00824658	0.16299	0.131349	0.196962		0.0323504	0.0656133
r2t_990	409	1.00528	0.990331	1.02177	0.00803557	0.163392	0.132469	0.195904		0.0314381	0.0634346
r2t_990	410	1.00513	0.990014	1.02133	0.00801249	0.163004	0.131529	0.195442		0.0313147	0.063913
r2t_990	411	1.00506	0.989407	1.02131	0.00813919	0.162915	0.131593	0.195742		0.0319004	0.0641489
r2t_990	412	1.00494	0.989411	1.02156	0.00806861	0.162861	0.131833	0.195719		0.0321495	0.0638856
r2t_990	413	1.00495	0.989672	1.02118	0.00800993	0.16294	0.132504	0.196052		0.0315062	0.063548
r2t_990	414	1.00505	0.989412	1.02148	0.00814563	0.162822	0.131168	0.195513		0.0320703	0.0643448
r2t_990	415	1.00485	0.989301	1.02112	0.00800716	0.162783	0.130972	0.19582		0.0318211	0.0648489
r2t_990	416	1.00504	0.989616	1.02133	0.00808527	0.163037	0.132578	0.195616		0.0317136	0.0630382
r2t_990	417	1.00507	0.989769	1.02152	0.00801583	0.16314	0.131594	0.195736		0.0317488	0.0641414
r2t_990	418	1.00498	0.989822	1.02103	0.00789501	0.16317	0.132405	0.195143		0.031209	0.0627379
r2t_990	419	1.00513	0.990152	1.02154	0.00802421	0.163298	0.13264	0.195549		0.031383	0.0629085
r2t_990	420	1.00516	0.989814	1.02103	0.00803144	0.163202	0.13234	0.19484		0.0312199	0.0624999
r2t_990	421	1.00513	0.989705	1.0211	0.00793404	0.163212	0.132494	0.195026		0.0313955	0.0625314
r2t_990	422	1.00506	0.989765	1.02137	0.00790998	0.163269	0.132248	0.19545		0.0316076	0.063202
r2t_990	423	1.00511	0.989823	1.02139	0.00797064	0.163094	0.132379	0.195358		0.0315706	0.0629786
r2t_990	424	1.00502	0.990001	1.02147	0.00802219	0.162985	0.131826	0.195285		0.0314652	0.0634583
r2t_990	425	1.00499	0.989875	1.02115	0.00798508	0.163105	0.132749	0.195358		0.0312739	0.0626087
ktx1	2	1.00236	0.872	1.153	0.0658563	0.0483315	0.00112535	0.1725		0.281	0.171375
ktx1	3	1.00091	0.8924	1.11867	0.0544088	0.0625583	0.00836964	0.182677		0.226267	0.174307
ktx1	4	1.00108	0.91067	1.0975	0.0459602	0.0688559	0.0150685	0.177394		0.18683	0.162326
ktx1	5	1.00181	0.916586	1.089	0.0416663	0.0732843	0.019357	0.176256		0.172414	0.156899
ktx1	6	1.00068	0.922963	1.0777	0.0383389	0.0762291	0.0237174	0.177106		0.154736	0.153388
ktx1	7	1.00038	0.928704	1.07317	0.0356199	0.0784715	0.0272159	0.182198		0.144464	0.154982
ktx1	8	1.00082	0.93375	1.06749	0.0330337	0.0803215	0.0311578	0.175923		0.133745	0.144765
ktx1	9	1.00132	0.937341	1.06449	0.0311615	0.0815994	0.0323896	0.172675		0.127145	0.140285
ktx1	10	1.00073	0.941033	1.0595	0.029803	0.0825173	0.0354722	0.167828		0.118467	0.132356
ktx1	11	1.00074	0.944354	1.05673	0.028296	0.0837139	0.037176	0.165199		0.112373	0.128023
ktx1	12	1.00064	0.947658	1.0553	0.0272496	0.0840743	0.0383078	0.162196		0.107646	0.123888
ktx1	13	1.00064	0.947445	1.05095	0.0259791	0.0847247	0.039661	0.158684		0.103501	0.119023
ktx1	14	1.00085	0.951587	1.05148	0.0251596	0.0858111	0.0416967	0.159913		0.099895	0.118216
ktx1	15	1.00061	0.951911	1.04846	0.0244122	0.0861485	0.0431868	0.155488		0.0965534	0.112301
ktx1	16	1.00091	0.954678	1.04759	0.0232228	0.0860024	0.0431773	0.152132		0.0929091	0.108954
ktx1	17	1.00098	0.955473	1.04655	0.0229073	0.087096	0.0446391	0.153988		0.0910731	0.109349
ktx1	18	1.00087	0.955594	1.04406	0.0224406	0.0874767	0.0460382	0.149283		0.0884686	0.103244
ktx1	19	1.00096	0.95744	1.04361	0.0216288	0.0872292	0.046585	0.149054		0.0861702	0.102469
ktx1	20	1.00099	0.959123	1.04215	0.0209904	0.0882588	0.0475553	0.148745		0.0830246	0.10119
ktx1	21	1.00087	0.960455	1.04155	0.0207011	0.0883069	0.0485038	0.147589		0.0810992	0.0990855
ktx1	22	1.00071	0.9623	1.03961	0.0198102	0.0880253	0.0490518	0.146351		0.0773139	0.0972995
ktx1	23	1.00098	0.963314	1.03893	0.0193523	0.0886089	0.0502058	0.146415		0.0756152	0.0962089
ktx1	24	1.0005	0.96265	1.03799	0.019122	0.0888481	0.0504667	0.1449		0.0753389	0.0944336
ktx1	25	1.00091	0.963228	1.03796	0.0188106	0.0891215	0.0511686	0.141921		0.0747299	0.0907524
ktx1	26	1.00091	0.964071	1.03785	0.018388	0.0888	0.0516999	0.142129		0.0737767	0.0904294
ktx1	27	1.00082	0.964994	1.03599	0.0179473	0.0895773	0.0526453	0.142227		0.0709944	0.0895816
ktx1	28	1.00065	0.965335	1.03541	0.0178476	0.089498	0.0526788	0.141832		0.0700761	0.0891529
ktx1	29	1.0008	0.966269	1.03512	0.0173733	0.0894771	0.0535731	0.138765		0.0688503	0.0851918
ktx1	30	1.00079	0.967356	1.03463	0.0170081	0.0901022	0.0545515	0.138116		0.0672749	0.0835644
ktx1	31	1.00075	0.968	1.03364	0.0168529	0.0897927	0.0546448	0.136659		0.0656419	0.0820139
ktx1	32	1.00104	0.96791	1.03357	0.016451	0.0901639	0.0549791	0.136653		0.0656611	0.0816736
ktx1	33	1.00104	0.968089	1.03402	0.0164377	0.0902912	0.0556769	0.136725		0.0659339	0.0810481
ktx1	34	1.00115	0.968892	1.03297	0.0161392	0.0901826	0.0563301	0.135385		0.0640827	0.0790548
ktx1	35	1.00092	0.968899	1.03269	0.0160879	0.0903959	0.0567181	0.135705		0.0637891	0.0789872
ktx1	36	1.00093	0.969328	1.03213	0.0158629	0.0906997	0.0568399	0.135542		0.0628009	0.0787024
ktx1	37	1.00058	0.970129	1.0303	0.0152648	0.0905996	0.0579717	0.134582		0.060174	0.0766099
ktx1	38	1.00073	0.97003	1.03074	0.015372	0.0908547	0.0576149	0.134652		0.0607142	0.0770369
ktx1	39	1.00068	0.971489	1.03046	0.0150536	0.0908154	0.0585765	0.132611		0.0589687	0.0740343
ktx1	40	1.00063	0.971317	1.02979	0.0149094	0.0913211	0.0586336	0.133418		0.0584758	0.0747842
ktx1	41	1.00072	0.971598	1.03015	0.0147382	0.0908464	0.0580871	0.132524		0.0585534	0.0744371
ktx1	42	1.00097	0.971887	1.02934	0.0144011	0.0908278	0.0589127	0.131895		0.0574536	0.0729825
ktx1	43	1.00085	0.972768	1.02941	0.0143913	0.0911005	0.060055	0.131605		0.0566424	0.0715502
ktx1	44	1.00053	0.972785	1.02836	0.0142404	0.0913095	0.0602069	0.130581		0.0555781	0.0703737
ktx1	45	1.00072	0.973315	1.02826	0.0139553	0.0912394	0.0598626	0.131187		0.0549431	0.0713247
ktx1	46	1.00099	0.973064	1.02849	0.0139032	0.0914779	0.0605119	0.130829		0.0554259	0.0703167
ktx1	47	1.00085	0.974492	1.02788	0.0135832	0.0910887	0.060958	0.129222		0.0533865	0.0682639
ktx1	48	1.00076	0.973514	1.02749	0.0136521	0.0915438	0.0613042	0.130187		0.0539712	0.0688826
ktx1	49	1.00085	0.974273	1.02797	0.0135836	0.091702	0.0607593	0.129904		0.0536999	0.0691448
ktx1	50	1.00114	0.97479	1.02756	0.0133824	0.0915732	0.0621176	0.128082		0.0527745	0.065964
ktx1	51	1.00084	0.975019	1.02611	0.0130838	0.0913446	0.0619001	0.127749		0.0510887	0.0658489
ktx1	52	1.00108	0.974787	1.02696	0.0131384	0.0914616	0.0613961	0.127288		0.0521702	0.065892
ktx1	53	1.00083	0.975654	1.02641	0.0129893	0.0916695	0.0623001	0.128736		0.0507609	0.0664362
ktx1	54	1.00072	0.975225	1.0262	0.0129061	0.0915321	0.0631342	0.128086		0.050973	0.0649521
ktx1	55	1.0007	0.975603	1.02543	0.0126641	0.0913845	0.0628849	0.128369		0.0498259	0.0654844
ktx1	56	1.00081	0.976011	1.02483	0.0125251	0.0915473	0.0630208	0.126941		0.0488145	0.0639203
ktx1	57	1.00079	0.975545	1.02521	0.0125777	0.0922764	0.0634904	0.127848		0.0496634	0.0643573
ktx1	58	1.00067	0.976297	1.02479	0.0123405	0.0916074	0.063731	0.126142		0.0484967	0.0624106
ktx1	59	1.00064	0.976607	1.02465	0.0122752	0.0916447	0.0638666	0.126369		0.0480396	0.0625022
ktx1	60	1.00073	0.97667	1.02515	0.0122172	0.0918389	0.0640691	0.125983		0.0484794	0.0619139
ktx1	61	1.00082	0.977241	1.02461	0.0120593	0.0918718	0.0643085	0.125437		0.0473699	0.0611286
ktx1	62	1.00071	0.976918	1.02429	0.0119915	0.0920898	0.0641067	0.125613		0.0473763	0.0615058
ktx1	63	1.00087	0.977338	1.02364	0.0118291	0.0918187	0.0647213	0.124875		0.0462981	0.0601539
ktx1	64	1.00075	0.97772	1.02365	0.0116222	0.0921235	0.0646623	0.125082		0.0459317	0.0604195
ktx1	65	1.00065	0.977386	1.02373	0.0118321	0.092078	0.0649496	0.125192		0.0463406	0.0602422
ktx1	66	1.00079	0.977831	1.02343	0.0116824	0.0920376	0.0651827	0.124806		0.0455953	0.059623
ktx1	67	1.00087	0.977801	1.02346	0.0116057	0.0922764	0.0649291	0.124787		0.0456558	0.0598577
ktx1	68	1.00092	0.978235	1.02363	0.0114161	0.0923569	0.0657604	0.124938		0.0453944	0.0591777
ktx1	69	1.00089	0.978695	1.02295	0.0112944	0.0921723	0.0659716	0.125018		0.0442533	0.059046
ktx1	70	1.00057	0.97848	1.0223	0.0111767	0.092185	0.066126	0.124343		0.0438162	0.0582172
ktx1	71	1.00082	0.978949	1.02239	0.0110591	0.0921227	0.0657296	0.123853		0.0434449	0.0581232
ktx1	72	1.00091	0.9793	1.02251	0.0110313	0.0922114	0.0659052	0.123383		0.0432147	0.0574775
ktx1	73	1.00085	0.979297	1.02197	0.0109524	0.0921881	0.0662935	0.12332		0.0426754	0.0570266
ktx1	74	1.00077	0.979232	1.02206	0.0109005	0.0922639	0.0665134	0.122762		0.0428232	0.0562483
ktx1	75	1.00081	0.979192	1.02238	0.0108855	0.0920342	0.0672366	0.12179		0.0431922	0.0545532
ktx1	76	1.00078	0.979193	1.02201	0.0107914	0.0921951	0.0667457	0.122242		0.0428154	0.0554966
ktx1	77	1.00071	0.979698	1.02132	0.010638	0.0922261	0.06706	0.122514		0.0416203	0.0554543
ktx1	78	1.00073	0.97994	1.02147	0.0105598	0.0923328	0.0673817	0.12195		0.0415265	0.0545685
ktx1	79	1.00074	0.980166	1.02147	0.0105372	0.092455	0.0676979	0.122631		0.041303	0.0549333
ktx1	80	1.00076	0.980349	1.02128	0.0104613	0.0920836	0.0673973	0.121782		0.0409314	0.0543848
ktx1	81	1.00077	0.980441	1.02144	0.0103812	0.092433	0.0681421	0.121068		0.0409968	0.0529263
ktx1	82	1.00072	0.980172	1.02099	0.0103263	0.0923406	0.0678328	0.122247		0.0408212	0.0544138
ktx1	83	1.00059	0.979995	1.02098	0.0103491	0.0924407	0.0681645	0.12144		0.0409844	0.0532759
ktx1	84	1.00086	0.980676	1.02174	0.0103655	0.0922374	0.0682153	0.120572		0.0410661	0.0523565
ktx1	85	1.00077	0.980767	1.02086	0.0100933	0.0923807	0.0685322	0.120674		0.040089	0.0521419
ktx1	86	1.0007	0.980453	1.0204	0.0101382	0.0927233	0.0683513	0.120954		0.0399514	0.0526027
ktx1	87	1.00082	0.980423	1.02126	0.0101972	0.092534	0.0686101	0.120939		0.0408418	0.0523288
ktx1	88	1.00093	0.981486	1.02025	0.00993447	0.0927002	0.0683707	0.121102		0.0387648	0.0527317
ktx1	89	1.00089	0.981202	1.02018	0.00998118	0.0924312	0.0693248	0.119942		0.0389827	0.0506168
ktx1	90	1.00099	0.981623	1.0203	0.0098561	0.0926336	0.0690165	0.120133		0.0386751	0.0511163
ktx1	91	1.00086	0.981326	1.01991	0.00987572	0.0925409	0.0688728	0.11941		0.038587	0.0505372
ktx1	92	1.00083	0.981311	1.02024	0.00982761	0.0925028	0.0688674	0.11968		0.0389276	0.0508126
ktx1	93	1.00081	0.981257	1.01962	0.00981285	0.0925839	0.0690648	0.119313		0.0383677	0.0502481
ktx1	94	1.00082	0.981256	1.01959	0.00971619	0.0928646	0.069446	0.120495		0.0383305	0.0510494
ktx1	95	1.00086	0.98168	1.01986	0.00969367	0.0925226	0.0697045	0.119551		0.0381816	0.0498468
ktx1	96	1.00071	0.981594	1.01944	0.00958991	0.0926145	0.0698252	0.119237		0.0378464	0.0494121
ktx1	97	1.00074	0.982085	1.01938	0.00958807	0.0926244	0.0701835	0.119048		0.0372935	0.0488643
ktx1	98	1.00064	0.982199	1.01934	0.00948936	0.0927105	0.0698887	0.118982		0.037142	0.0490934
ktx1	99	1.00073	0.982062	1.01885	0.00942301	0.0927168	0.0703228	0.119174		0.0367861	0.0488514
ktx1	100	1.0008	0.98251	1.01899	0.00931442	0.0927779	0.0700899	0.118903		0.036482	0.0488127
ktx1	101	1.0008	0.982585	1.01879	0.00928128	0.0923574	0.0703353	0.118063		0.036205	0.0477275
ktx1	102	1.00081	0.982711	1.01894	0.00927236	0.0927812	0.0704932	0.118272		0.0362333	0.0477791
ktx1	103	1.0009	0.983075	1.01932	0.00934903	0.0928181	0.070392	0.118779		0.0362442	0.0483875
ktx1	104	1.00079	0.982859	1.01867	0.0090952	0.0925659	0.0707599	0.118275		0.0358115	0.0475146
ktx1	105	1.00086	0.98313	1.01846	0.00908262	0.0928762	0.0704207	0.119098		0.0353302	0.0486768
ktx1	106	1.00089	0.983168	1.01846	0.00904886	0.0926869	0.0709325	0.118202		0.0352911	0.0472698
ktx1	107	1.00084	0.982844	1.01842	0.00908105	0.0929514	0.0709499	0.118318		0.035571	0.0473682
ktx1	108	1.00077	0.982985	1.01855	0.00902239	0.092789	0.0708986	0.118434		0.0355649	0.0475359
ktx1	109	1.00073	0.982956	1.0184	0.00905666	0.092501	0.0702499	0.117632		0.0354413	0.0473816
ktx1	110	1.00067	0.983379	1.01804	0.00894966	0.092786	0.0714208	0.118292		0.0346627	0.0468713
ktx1	111	1.00078	0.983086	1.0185	0.00899298	0.0927547	0.0708526	0.117763		0.0354188	0.0469101
ktx1	112	1.00076	0.98373	1.01802	0.00886029	0.092658	0.0715355	0.117416		0.0342916	0.0458805
ktx1	113	1.00093	0.983448	1.01855	0.00889907	0.0929756	0.0712047	0.118292		0.0350994	0.0470868
ktx1	114	1.00084	0.983237	1.01825	0.00884529	0.0928837	0.0716747	0.11747		0.0350096	0.0457954
ktx1	115	1.00077	0.983288	1.01827	0.00892159	0.0930295	0.0716753	0.11754		0.0349804	0.0458652
ktx1	116	1.00067	0.983872	1.01761	0.00863322	0.0928909	0.0713833	0.117421		0.0337342	0.0460375
ktx1	117	1.00077	0.983542	1.01771	0.00869133	0.093027	0.0720419	0.117453		0.0341669	0.045411
ktx1	118	1.00092	0.983651	1.01798	0.00869575	0.0927964	0.0718387	0.116959		0.0343343	0.0451201
ktx1	119	1.00095	0.984148	1.01783	0.0085956	0.0929715	0.0723055	0.116694		0.0336808	0.0443886
ktx1	120	1.00085	0.983945	1.01763	0.00862144	0.0927379	0.0717953	0.116849		0.0336852	0.0450541
ktx1	121	1.0006	0.98387	1.01773	0.00858965	0.0930179	0.072451	0.116818		0.0338604	0.0443665
ktx1	122	1.00086	0.984306	1.01724	0.00850434	0.0928584	0.0722805	0.116282		0.0329373	0.0440012
ktx1	123	1.00077	0.984178	1.01706	0.00837281	0.0930278	0.0721568	0.11713		0.0328822	0.0449728
ktx1	124	1.00095	0.98447	1.01749	0.00843737	0.0929783	0.0727887	0.116395		0.0330186	0.0436059
ktx1	125	1.00077	0.984004	1.01721	0.00844596	0.0931379	0.0724213	0.116929		0.0332052	0.0445081
ktx1	126	1.00071	0.98424	1.01698	0.00827385	0.0928177	0.0723791	0.115978		0.0327389	0.0435987
ktx1	127	1.00091	0.98495	1.01731	0.00819809	0.0930441	0.0727522	0.116429		0.0323636	0.0436772
ktx1	128	1.00061	0.9845	1.01689	0.0083232	0.0931059	0.0726406	0.115609		0.0323952	0.0429685
ktx1	129	1.00086	0.984324	1.0173	0.00825395	0.0929272	0.0727995	0.115998		0.0329787	0.0431984
ktx1	130	1.00069	0.984434	1.01662	0.00819361	0.092971	0.0727638	0.115816		0.0321881	0.0430524
ktx1	131	1.00086	0.984762	1.01701	0.00819639	0.0929933	0.0728884	0.115826		0.0322501	0.0429374
ktx1	132	1.00084	0.98479	1.01741	0.00824543	0.0930521	0.0726498	0.115783		0.032623	0.0431335
ktx1	133	1.00086	0.984751	1.01682	0.00813974	0.0930701	0.0730915	0.115989		0.0320739	0.0428979
ktx1	134	1.00084	0.984732	1.01688	0.0081852	0.0929116	0.072588	0.115329		0.0321467	0.0427409
ktx1	135	1.00102	0.985264	1.01685	0.00809555	0.0930526	0.0733812	0.11531		0.031585	0.0419291
ktx1	136	1.00084	0.984887	1.01664	0.00811892	0.0929579	0.0732809	0.115946		0.0317516	0.0426655
ktx1	137	1.00093	0.985277	1.01682	0.00797126	0.0929474	0.0732863	0.115332		0.0315392	0.0420454
ktx1	138	1.00078	0.984834	1.01659	0.00804695	0.0930174	0.0738589	0.115196		0.0317557	0.0413375
ktx1	139	1.00077	0.985034	1.0162	0.00793397	0.0927446	0.0733459	0.114447		0.0311687	0.0411015
ktx1	140	1.00069	0.984977	1.01589	0.00792905	0.0932678	0.0736201	0.115412		0.0309111	0.041792
ktx1	141	1.00077	0.985147	1.01613	0.00795888	0.0930093	0.0737314	0.114854		0.0309824	0.0411226
ktx1	142	1.00077	0.985234	1.01661	0.00794329	0.0931456	0.0736134	0.114702		0.0313783	0.0410886
ktx1	143	1.00081	0.98516	1.01616	0.00784343	0.0930042	0.073437	0.114669		0.0310022	0.0412325
ktx1	144	1.00091	0.985634	1.0162	0.00783801	0.0932736	0.0738326	0.114748		0.0305689	0.0409154
ktx1	145	1.00084	0.985406	1.01589	0.00779053	0.0932339	0.0742428	0.11517		0.0304818	0.0409267
ktx1	146	1.0007	0.985497	1.01599	0.00772951	0.0930562	0.0738043	0.114901		0.0304894	0.0410969
ktx1	147	1.00073	0.985828	1.01598	0.00776133	0.0928862	0.0736651	0.11374		0.0301519	0.0400751
ktx1	148	1.00081	0.985298	1.01599	0.00783202	0.0931752	0.0739512	0.115059		0.0306877	0.0411082
ktx1	149	1.00101	0.985619	1.01631	0.00781103	0.0930367	0.0738383	0.11446		0.030689	0.040622
ktx1	150	1.00094	0.985988	1.01592	0.00772057	0.0930065	0.0743625	0.114258		0.0299346	0.0398952
ktx1	151	1.00085	0.985962	1.01576	0.00756002	0.0931858	0.0739615	0.114424		0.0297972	0.0404627
ktx1	152	1.00077	0.986278	1.01553	0.0075334	0.0929631	0.074341	0.114157		0.0292473	0.0398156
ktx1	153	1.00068	0.985773	1.01535	0.00756857	0.0932325	0.0744093	0.114625		0.0295768	0.0402156
ktx1	154	1.00081	0.985813	1.01605	0.00763888	0.0931628	0.0746463	0.114412		0.0302383	0.0397658
ktx1	155	1.00069	0.985742	1.0155	0.00755732	0.0930772	0.0747657	0.114009		0.0297582	0.0392432
ktx1	156	1.00078	0.986118	1.01572	0.00751941	0.0932379	0.0743018	0.11423		0.029603	0.0399283
ktx1	157	1.00081	0.985751	1.01575	0.00758088	0.0930932	0.0741978	0.114062		0.0300022	0.0398645
ktx1	158	1.00084	0.986256	1.01529	0.00747424	0.0932637	0.0746551	0.114137		0.0290308	0.0394817
ktx1	159	1.00087	0.986252	1.01523	0.00740031	0.0931474	0.0744853	0.114028		0.0289799	0.0395429
ktx1	160	1.00096	0.986324	1.01554	0.00742913	0.0931541	0.0746976	0.113929		0.02922	0.0392311
ktx1	161	1.00089	0.986276	1.0154	0.00739866	0.0933435	0.0752812	0.113672		0.0291259	0.0383912
ktx1	162	1.00074	0.986348	1.01484	0.00729727	0.09324	0.0748164	0.113381		0.0284914	0.0385648
ktx1	163	1.0008	0.986504	1.01516	0.00732564	0.0932299	0.0750279	0.113664		0.0286603	0.0386358
ktx1	164	1.00076	0.986195	1.01528	0.00742081	0.0932484	0.0752563	0.113869		0.0290849	0.0386124
ktx1	165	1.00083	0.986309	1.01544	0.00742293	0.0933636	0.0754132	0.113385		0.0291302	0.0379719
ktx1	166	1.00081	0.986174	1.01503	0.00730716	0.0931906	0.0749278	0.113338		0.028856	0.0384107
ktx1	167	1.0008	0.986681	1.01481	0.0071747	0.0932671	0.0749582	0.113986		0.0281289	0.0390279
ktx1	168	1.00075	0.987095	1.01477	0.00717402	0.0932219	0.0751301	0.113054		0.02767	0.0379243
ktx1	169	1.00083	0.986411	1.0155	0.00726567	0.0932451	0.0753068	0.113496		0.0290888	0.038189
ktx1	170	1.00079	0.986646	1.01495	0.0071992	0.0932571	0.0754383	0.11341		0.0283017	0.0379713
ktx1	171	1.00076	0.9868	1.01489	0.00717395	0.0933043	0.0753431	0.113066		0.0280899	0.0377228
ktx1	172	1.0008	0.986889	1.01475	0.00715525	0.0934065	0.0761913	0.113566		0.027861	0.0373745
ktx1	173	1.00082	0.986437	1.01501	0.00723628	0.0932265	0.0757679	0.112374		0.0285726	0.0366061
ktx1	174	1.00076	0.986561	1.01483	0.00723745	0.0933309	0.0754081	0.113237		0.0282649	0.0378293
ktx1	175	1.00085	0.986873	1.01487	0.00713305	0.0932813	0.0754442	0.112935		0.0279979	0.0374912
ktx1	176	1.0009	0.986912	1.0146	0.00704943	0.0932684	0.075944	0.11293		0.0276838	0.0369856
ktx1	177	1.00067	0.986633	1.01452	0.00712139	0.0932332	0.07597	0.112594		0.0278863	0.0366243
ktx1	178	1.0009	0.986764	1.01473	0.00708682	0.0931402	0.0754784	0.112441		0.027971	0.0369627
ktx1	179	1.00083	0.987241	1.01455	0.00703418	0.0933931	0.0759883	0.112711		0.0273101	0.0367232
ktx1	180	1.00081	0.987101	1.01467	0.00699959	0.093064	0.07581	0.11218		0.0275673	0.03637
ktx1	181	1.00088	0.987209	1.01443	0.00697657	0.093262	0.0758967	0.111962		0.0272222	0.0360652
ktx1	182	1.00096	0.987283	1.01441	0.00694906	0.0933737	0.0759829	0.112388		0.027128	0.0364048
ktx1	183	1.00078	0.987327	1.01487	0.00703442	0.0932167	0.0757968	0.112578		0.0275394	0.0367816
ktx1	184	1.00093	0.987577	1.01416	0.00681148	0.0931622	0.0754537	0.112063		0.0265808	0.036609
ktx1	185	1.00083	0.987192	1.01444	0.00691573	0.0931746	0.0755063	0.112337		0.0272467	0.0368309
ktx1	186	1.00091	0.987359	1.01422	0.00683267	0.0933528	0.076245	0.112743		0.0268662	0.0364984
ktx1	187	1.00081	0.987123	1.0143	0.00692239	0.0932481	0.0758845	0.112286		0.0271724	0.0364016
ktx1	188	1.00076	0.987416	1.01452	0.00689093	0.0933515	0.0759409	0.112644		0.0271006	0.0367026
ktx1	189	1.00079	0.987434	1.01414	0.00674947	0.0933072	0.0760862	0.112291		0.0267067	0.0362045
ktx1	190	1.00082	0.987122	1.01415	0.00686413	0.0932464	0.0759103	0.11221		0.0270251	0.0362996
ktx1	191	1.00079	0.987636	1.01422	0.00672457	0.0933785	0.0763872	0.112143		0.0265809	0.0357562
ktx1	192	1.00079	0.98737	1.01412	0.00670921	0.0933562	0.0764902	0.112386		0.0267488	0.0358954
ktx1	193	1.00076	0.987428	1.01388	0.00676073	0.0931626	0.0764325	0.111578		0.026457	0.0351457
ktx1	194	1.00076	0.987591	1.01382	0.00674397	0.0933586	0.0766024	0.111969		0.0262317	0.0353666
ktx1	195	1.00081	0.987537	1.01399	0.00678554	0.0932718	0.0761671	0.112436		0.0264579	0.0362691
ktx1	196	1.00075	0.987427	1.01392	0.00672868	0.0932883	0.0764058	0.111879		0.0264953	0.0354735
ktx1	197	1.00078	0.987808	1.01378	0.00667055	0.0934215	0.0768591	0.111549		0.0259758	0.0346896
ktx1	198	1.00083	0.987591	1.01415	0.00670224	0.0933191	0.0768765	0.112203		0.0265601	0.0353261
ktx1	199	1.00075	0.987508	1.0137	0.00665668	0.0934607	0.0768352	0.11197		0.026191	0.0351346
ktx1	200	1.00076	0.987632	1.01404	0.00665584	0.0934572	0.0766404	0.111479		0.0264035	0.0348389
ktx1	201	1.00076	0.987653	1.01382	0.0066755	0.0934994	0.0768598	0.111651		0.0261631	0.034791
ktx1	202	1.00072	0.987706	1.01383	0.00666464	0.0931652	0.0766706	0.111417		0.0261264	0.0347464
ktx1	203	1.0008	0.987852	1.01386	0.00657978	0.0933217	0.0769543	0.111588		0.0260034	0.0346336
ktx1	204	1.00073	0.987796	1.01359	0.00655699	0.0932996	0.0768314	0.111672		0.0257955	0.0348403
ktx1	205	1.0007	0.987617	1.01358	0.00654782	0.0934303	0.077057	0.111854		0.0259675	0.0347972
ktx1	206	1.00082	0.988008	1.0138	0.0065254	0.093329	0.0767759	0.111579		0.0257954	0.0348035
ktx1	207	1.00088	0.987915	1.01378	0.00653764	0.0935197	0.0773089	0.111555		0.0258634	0.0342462
ktx1	208	1.00071	0.98814	1.0135	0.00649516	0.0933973	0.0771407	0.111695		0.0253601	0.0345547
ktx1	209	1.0008	0.988037	1.01344	0.00647974	0.0932698	0.0771213	0.111368		0.0254016	0.0342468
ktx1	210	1.00083	0.98843	1.01336	0.00637923	0.0933714	0.076998	0.111866		0.0249353	0.0348681
ktx1	211	1.00083	0.988013	1.01314	0.00642708	0.0932904	0.0772142	0.111012		0.0251239	0.0337981
ktx1	212	1.00079	0.987997	1.01325	0.00641137	0.0935171	0.0772938	0.111764		0.0252563	0.0344702
ktx1	213	1.0008	0.988432	1.01345	0.00642273	0.0933812	0.0771688	0.11098		0.0250131	0.0338115
ktx1	214	1.00086	0.987861	1.01327	0.00646138	0.0933763	0.0769396	0.110957		0.025404	0.0340173
ktx1	215	1.00074	0.988319	1.01298	0.00633825	0.0934043	0.0774218	0.111404		0.0246621	0.0339817
ktx1	216	1.00082	0.98826	1.01313	0.00635213	0.0931967	0.0774985	0.110681		0.0248726	0.033182
ktx1	217	1.00083	0.988185	1.01323	0.00641252	0.0935152	0.077409	0.111323		0.0250502	0.0339138
ktx1	218	1.00078	0.988328	1.01318	0.00637755	0.0935426	0.0775299	0.111342		0.0248553	0.0338122
ktx1	219	1.00079	0.988323	1.0133	0.00641046	0.0933486	0.0773786	0.110813		0.0249763	0.0334346
ktx1	220	1.00076	0.988316	1.01312	0.00632961	0.0932667	0.0771113	0.110843		0.0248034	0.0337316
ktx1	221	1.0009	0.98866	1.01314	0.0062819	0.0934444	0.0773811	0.110663		0.0244812	0.033282
ktx1	222	1.0009	0.988517	1.0132	0.00638132	0.0934217	0.0776675	0.110798		0.0246805	0.033131
ktx1	223	1.00092	0.988662	1.01327	0.00634247	0.093467	0.0775355	0.11067		0.0246115	0.0331349
ktx1	224	1.00084	0.988368	1.01317	0.00631773	0.0934341	0.0774328	0.110706		0.0247994	0.0332735
ktx1	225	1.00076	0.988441	1.01298	0.00631117	0.0935629	0.0778592	0.111011		0.0245354	0.0331515
ktx1	226	1.00077	0.988576	1.01288	0.00618693	0.0933607	0.0777115	0.110991		0.0243031	0.0332799
ktx1	227	1.00084	0.988534	1.01293	0.00623857	0.0934901	0.0779882	0.110534		0.0243953	0.0325456
ktx1	228	1.00073	0.98847	1.01296	0.00622833	0.093436	0.0775757	0.11068		0.0244932	0.0331047
ktx1	229	1.00072	0.9882	1.01303	0.00626654	0.0934695	0.0779636	0.110466		0.024828	0.0325022
ktx1	230	1.00075	0.988651	1.01286	0.00620596	0.0933909	0.0777188	0.110096		0.02421	0.0323772
ktx1	231	1.00082	0.988867	1.01295	0.00618381	0.0933795	0.0776027	0.110372		0.024083	0.0327693
ktx1	232	1.00077	0.988693	1.01309	0.0061561	0.0935441	0.0783759	0.1102		0.0243947	0.0318245
ktx1	233	1.00073	0.988799	1.0127	0.00612846	0.0934463	0.0780613	0.11048		0.023906	0.0324188
ktx1	234	1.00075	0.988649	1.01298	0.00612735	0.0936368	0.0781004	0.110142		0.0243347	0.0320418
ktx1	235	1.00082	0.988554	1.01298	0.00618652	0.0935294	0.0780135	0.110235		0.0244243	0.0322213
ktx1	236	1.00078	0.988679	1.01293	0.00612444	0.093385	0.0778778	0.109933		0.0242538	0.032055
ktx1	237	1.00081	0.988924	1.01285	0.00612233	0.0934737	0.0781806	0.110231		0.0239279	0.0320506
ktx1	238	1.0007	0.988813	1.01253	0.00607539	0.0934495	0.0780875	0.110172		0.0237175	0.0320844
ktx1	239	1.00072	0.988694	1.01272	0.00611018	0.0934555	0.0783143	0.110691		0.0240271	0.0323763
ktx1	240	1.00073	0.98888	1.01268	0.00605261	0.0934836	0.0783096	0.109811		0.0237979	0.0315011
ktx1	241	1.00082	0.988792	1.01251	0.00599314	0.0935199	0.0781323	0.11037		0.0237223	0.0322375
ktx1	242	1.00086	0.989009	1.01268	0.00604794	0.0935053	0.0780528	0.110488		0.0236687	0.0324353
ktx1	243	1.0008	0.98936	1.0124	0.00594878	0.0934819	0.0782153	0.110286		0.0230364	0.0320711
ktx1	244	1.00079	0.988968	1.01268	0.00602234	0.0935095	0.0785091	0.110331		0.0237116	0.0318223
ktx1	245	1.00078	0.988715	1.01259	0.006006	0.0934002	0.0782566	0.110082		0.0238729	0.0318258
ktx1	246	1.00081	0.989077	1.01266	0.00600391	0.0936046	0.0784095	0.110264		0.0235831	0.0318541
ktx1	247	1.00079	0.989136	1.01256	0.00597049	0.0935033	0.07857	0.110218		0.0234253	0.0316477
ktx1	248	1.00079	0.988987	1.01249	0.00596182	0.093563	0.0783979	0.110278		0.0234981	0.03188
ktx1	249	1.00076	0.989027	1.01275	0.00601731	0.0935583	0.0785682	0.109921		0.023723	0.0313533
ktx1	250	1.00082	0.988939	1.01255	0.00596436	0.093458	0.078475	0.109692		0.0236081	0.0312171
ktx1	251	1.00072	0.98921	1.01213	0.00584646	0.0935042	0.0785983	0.109762		0.0229203	0.0311636
ktx1	252	1.00075	0.988961	1.01254	0.00600643	0.0934261	0.0786997	0.109632		0.0235744	0.0309325
ktx1	253	1.00066	0.989244	1.01243	0.00590753	0.0935451	0.0784809	0.110463		0.0231853	0.031982
ktx1	254	1.00073	0.989057	1.01239	0.00597677	0.093475	0.0785972	0.109941		0.0233301	0.0313439
ktx1	255	1.00074	0.989083	1.0123	0.00589619	0.0936063	0.0786677	0.110053		0.02322	0.0313852
ktx1	256	1.00081	0.989321	1.01223	0.00583461	0.093317	0.078368	0.109562		0.0229071	0.031194
ktx1	257	1.00085	0.989026	1.01254	0.00588431	0.0934655	0.0787247	0.109643		0.0235185	0.0309182
ktx1	258	1.0008	0.989396	1.01181	0.0057275	0.0935529	0.0788307	0.10977		0.0224125	0.0309389
ktx1	259	1.00083	0.98965	1.01207	0.00579129	0.0934992	0.0785945	0.109573		0.0224166	0.0309787
ktx1	260	1.00084	0.989285	1.01212	0.00584558	0.0935075	0.0788313	0.109222		0.0228385	0.0303904
ktx1	261	1.0007	0.989065	1.0121	0.00576586	0.0934633	0.078834	0.109944		0.023039	0.0311099
ktx1	262	1.0008	0.989555	1.01205	0.00576672	0.0934344	0.0787083	0.109214		0.022492	0.0305055
ktx1	263	1.00072	0.989227	1.01197	0.00582022	0.0935765	0.0786664	0.109567		0.0227437	0.0309008
ktx1	264	1.00091	0.989349	1.01217	0.00578768	0.0935757	0.0788541	0.109601		0.0228232	0.0307467
ktx1	265	1.00087	0.989581	1.01231	0.00580147	0.0934955	0.0788966	0.109579		0.0227292	0.030682
ktx1	266	1.00083	0.989523	1.01198	0.00572526	0.093523	0.0790283	0.109282		0.0224531	0.0302542
ktx1	267	1.00094	0.989706	1.01201	0.00575972	0.0935385	0.0790963	0.109215		0.0223083	0.0301188
ktx1	268	1.00087	0.989659	1.01207	0.00577815	0.0935182	0.0790105	0.109206		0.0224086	0.0301955
ktx1	269	1.00084	0.989548	1.01239	0.0057956	0.0934216	0.0789882	0.108972		0.0228432	0.0299842
ktx1	270	1.00091	0.98949	1.0122	0.005725	0.0934186	0.0791907	0.108832		0.0227124	0.029641
ktx1	271	1.00093	0.989813	1.01227	0.00570448	0.0934839	0.0791552	0.109047		0.0224567	0.0298915
ktx1	272	1.00087	0.989853	1.01183	0.00562361	0.0934106	0.0789887	0.109261		0.0219728	0.030272
ktx1	273	1.00081	0.989278	1.01214	0.00576576	0.0936245	0.0791096	0.109095		0.0228621	0.0299854
ktx1	274	1.00082	0.989615	1.01197	0.00569872	0.0936869	0.0793024	0.109724		0.02236	0.0304215
ktx1	275	1.00077	0.989667	1.01193	0.00570361	0.0937034	0.0792106	0.109253		0.0222667	0.0300427
ktx1	276	1.00094	0.99012	1.01193	0.00556379	0.0935632	0.0791543	0.109114		0.0218075	0.02996
ktx1	277	1.00083	0.989656	1.01197	0.00569416	0.0936157	0.0793538	0.109291		0.0223091	0.0299373
ktx1	278	1.00091	0.990005	1.01205	0.00566808	0.0937365	0.0792819	0.10936		0.0220412	0.0300782
ktx1	279	1.00074	0.989625	1.01195	0.00567846	0.0934944	0.0791456	0.108764		0.0223249	0.0296181
ktx1	280	1.00081	0.989661	1.0118	0.00561208	0.0935022	0.0791089	0.108716		0.0221352	0.0296071
ktx1	281	1.00087	0.989796	1.01186	0.00564407	0.093657	0.0793576	0.109127		0.0220658	0.0297692
ktx1	282	1.00082	0.989872	1.0118	0.00558167	0.0934472	0.0794439	0.109041		0.021931	0.0295975
ktx1	283	1.00082	0.989815	1.01173	0.00560742	0.0935389	0.0794942	0.108435		0.0219187	0.0289408
ktx1	284	1.00081	0.989802	1.01194	0.00565722	0.0936641	0.0793914	0.109111		0.0221357	0.0297197
ktx1	285	1.00073	0.989752	1.01162	0.00560811	0.093579	0.0793667	0.108677		0.0218639	0.0293107
ktx1	286	1.00094	0.990139	1.01175	0.00555925	0.0937127	0.0797323	0.109314		0.0216131	0.029582
ktx1	287	1.0008	0.989782	1.0119	0.00555839	0.0935357	0.0794925	0.109059		0.0221163	0.0295662
ktx1	288	1.00083	0.989881	1.01195	0.00561285	0.0935672	0.0795717	0.108722		0.0220724	0.0291502
ktx1	289	1.00085	0.989862	1.01149	0.00549878	0.0936187	0.0796156	0.108923		0.0216293	0.029307
ktx1	290	1.00078	0.989946	1.01161	0.00547227	0.0935784	0.0796112	0.108878		0.0216609	0.0292665
ktx1	291	1.00075	0.99008	1.01162	0.00548036	0.0934626	0.0795005	0.108835		0.021536	0.0293348
ktx1	292	1.00078	0.990072	1.0114	0.00547316	0.0935935	0.0795524	0.108711		0.0213232	0.0291586
ktx1	293	1.00073	0.990016	1.01152	0.00551235	0.093615	0.079711	0.108547		0.0215035	0.0288355
ktx1	294	1.00089	0.989948	1.01147	0.0055084	0.0935887	0.0798181	0.108751		0.021527	0.0289326
ktx1	295	1.00085	0.990139	1.01169	0.00547867	0.093544	0.0795314	0.10884		0.021551	0.0293088
ktx1	296	1.00086	0.990308	1.01157	0.00544288	0.0935754	0.0796309	0.108498		0.0212625	0.028867
ktx1	297	1.00073	0.99007	1.01143	0.00541166	0.0937031	0.0798031	0.108954		0.0213627	0.0291512
ktx1	298	1.00093	0.990294	1.01172	0.00549878	0.0934047	0.0795317	0.108332		0.021426	0.0288004
ktx1	299	1.00089	0.990259	1.01154	0.00544689	0.0935769	0.0796787	0.108089		0.0212775	0.0284106
ktx1	300	1.00085	0.990492	1.01141	0.00541776	0.0935415	0.0797995	0.108271		0.0209191	0.028472
ktx1	301	1.00082	0.990204	1.01138	0.00541696	0.0934983	0.0799698	0.108363		0.0211714	0.0283935
ktx1	302	1.00088	0.99028	1.01174	0.00543194	0.0936789	0.0799274	0.10842		0.0214609	0.0284924
ktx1	303	1.00086	0.990051	1.01159	0.00542645	0.093497	0.0799693	0.108142		0.0215398	0.0281732
ktx1	304	1.00081	0.990472	1.01135	0.00534249	0.0936863	0.0803745	0.108541		0.0208784	0.0281665
ktx1	305	1.0008	0.990126	1.01139	0.00542829	0.0936276	0.0798421	0.108655		0.0212607	0.0288131
ktx1	306	1.00081	0.990307	1.01142	0.00533318	0.0936075	0.0801134	0.108358		0.0211132	0.0282448
ktx1	307	1.00082	0.990374	1.01128	0.00533039	0.0935454	0.0798947	0.108422		0.0209093	0.0285274
ktx1	308	1.00079	0.990309	1.01119	0.0053642	0.0935448	0.0800311	0.107961		0.0208836	0.0279302
ktx1	309	1.00071	0.990118	1.01115	0.00535292	0.0936299	0.0799899	0.108262		0.021028	0.0282723
ktx1	310	1.0007	0.99033	1.01111	0.00527485	0.0934378	0.0798627	0.108145		0.0207823	0.0282827
ktx1	311	1.00089	0.990311	1.01142	0.0053326	0.0936659	0.0799705	0.108275		0.0211103	0.0283043
ktx1	312	1.0008	0.990231	1.01129	0.00529947	0.0936258	0.0801759	0.10836		0.0210561	0.0281839
ktx1	313	1.00073	0.990393	1.01121	0.00531591	0.0936159	0.080333	0.108036		0.0208212	0.0277028
ktx1	314	1.00088	0.990319	1.01125	0.00533804	0.0936708	0.0803653	0.108403		0.0209296	0.0280378
ktx1	315	1.00086	0.990425	1.01128	0.00534366	0.0935869	0.08003	0.108291		0.0208571	0.0282615
ktx1	316	1.00077	0.990498	1.0111	0.00524277	0.0936103	0.0803756	0.108037		0.020597	0.0276616
ktx1	317	1.00076	0.990448	1.01116	0.00525581	0.0935501	0.0803479	0.108205		0.0207157	0.0278575
ktx1	318	1.00079	0.990305	1.01104	0.00530435	0.0936245	0.0799834	0.108161		0.0207376	0.0281772
ktx1	319	1.00087	0.990673	1.01104	0.00525559	0.0935013	0.0801159	0.107723		0.0203631	0.0276071
ktx1	320	1.00081	0.990701	1.01094	0.00519864	0.0935631	0.0803255	0.107911		0.0202346	0.0275855
ktx1	321	1.00084	0.990281	1.01104	0.00526929	0.0936987	0.080053	0.108101		0.0207547	0.0280483
ktx1	322	1.00084	0.990383	1.01115	0.00528271	0.0935718	0.0802818	0.108141		0.0207617	0.0278588
ktx1	323	1.00083	0.990351	1.01136	0.00532688	0.093653	0.0801907	0.108292		0.0210092	0.0281011
ktx1	324	1.00077	0.990365	1.01083	0.0052268	0.0936731	0.0801352	0.107875		0.0204642	0.0277395
ktx1	325	1.00084	0.990574	1.01096	0.00523265	0.0935775	0.0801321	0.107725		0.0203813	0.0275928
ktx1	326	1.00078	0.990599	1.01085	0.00522388	0.0936083	0.0804133	0.108004		0.0202469	0.0275905
ktx1	327	1.00083	0.990274	1.0112	0.00525955	0.0935178	0.0802278	0.10798		0.020926	0.0277521
ktx1	328	1.00079	0.990565	1.01075	0.00515235	0.0935976	0.080587	0.107697		0.0201888	0.0271095
ktx1	329	1.00088	0.990781	1.01125	0.00520953	0.0937282	0.080506	0.108031		0.0204732	0.027525
ktx1	330	1.00077	0.990669	1.01098	0.0051676	0.0935111	0.0801382	0.107632		0.0203075	0.0274939
ktx1	331	1.00076	0.990357	1.01108	0.00523108	0.0936429	0.0806866	0.107927		0.0207271	0.0272407
ktx1	332	1.00085	0.991001	1.0111	0.00513943	0.093579	0.0804232	0.108064		0.0201025	0.0276403
ktx1	333	1.00089	0.990636	1.01065	0.00513888	0.093505	0.0803092	0.107367		0.0200191	0.0270582
ktx1	334	1.00087	0.990816	1.01105	0.00516848	0.0935666	0.080421	0.10766		0.020235	0.0272395
ktx1	335	1.00078	0.990736	1.01102	0.0051456	0.0936875	0.080541	0.107823		0.020289	0.0272821
ktx1	336	1.00082	0.990601	1.01087	0.00512541	0.0936446	0.0806516	0.108088		0.0202706	0.0274361
ktx1	337	1.00078	0.990452	1.01092	0.00519212	0.0935888	0.0806387	0.108122		0.0204702	0.0274833
ktx1	338	1.00086	0.990626	1.01113	0.00519674	0.0936543	0.0806035	0.108185		0.0205053	0.027581
ktx1	339	1.00081	0.99071	1.01089	0.00509465	0.0936888	0.0805853	0.107788		0.0201795	0.0272026
ktx1	340	1.00087	0.990868	1.01067	0.00507034	0.0935649	0.0805565	0.107469		0.0198037	0.0269122
ktx1	341	1.00074	0.99056	1.0107	0.0050857	0.0937461	0.0807997	0.107872		0.0201358	0.0270724
ktx1	342	1.00082	0.990859	1.01074	0.00507843	0.0935382	0.0805713	0.107494		0.0198811	0.0269226
ktx1	343	1.00083	0.990815	1.01087	0.00510273	0.0935281	0.0806638	0.107478		0.020057	0.026814
ktx1	344	1.0008	0.99109	1.01061	0.00497215	0.0936518	0.0807035	0.10757		0.0195178	0.0268664
ktx1	345	1.00083	0.99072	1.01074	0.00507995	0.0937922	0.0807951	0.107793		0.0200159	0.0269979
ktx1	346	1.00072	0.990938	1.01063	0.00504039	0.0935262	0.0807317	0.10711		0.0196883	0.0263787
ktx1	347	1.00079	0.990772	1.01088	0.0050703	0.0937195	0.0807678	0.107787		0.0201073	0.0270189
ktx1	348	1.00093	0.990817	1.01103	0.00511921	0.0935647	0.0807095	0.107539		0.0202143	0.0268299
ktx1	349	1.00086	0.991176	1.01064	0.00502848	0.0936137	0.0806826	0.10745		0.0194682	0.0267674
ktx1	350	1.00079	0.991071	1.01079	0.00502946	0.0936816	0.0810756	0.107555		0.019723	0.026479
ktx1	351	1.00083	0.991216	1.01075	0.00500263	0.093674	0.0808663	0.107496		0.0195314	0.0266298
ktx1	352	1.00078	0.990835	1.01053	0.00500064	0.0936185	0.080783	0.107209		0.0196913	0.0264265
ktx1	353	1.00074	0.990651	1.01067	0.00507862	0.0936024	0.0806946	0.10726		0.0200191	0.026565
ktx1	354	1.00089	0.991126	1.01079	0.00499164	0.0935755	0.0806547	0.107633		0.0196677	0.0269784
ktx1	355	1.00078	0.990861	1.01055	0.0050359	0.0937338	0.0809715	0.107549		0.0196915	0.0265772
ktx1	356	1.00081	0.991085	1.01038	0.00495646	0.0937029	0.0810438	0.107468		0.0192949	0.0264246
ktx1	357	1.00087	0.990983	1.01071	0.00499594	0.093585	0.0808841	0.10749		0.0197251	0.0266063
ktx1	358	1.00081	0.991014	1.01052	0.00497664	0.0937346	0.0806318	0.107529		0.0195048	0.0268975
ktx1	359	1.00086	0.99113	1.01055	0.00494384	0.0936969	0.0812248	0.107247		0.0194219	0.0260223
ktx1	360	1.00078	0.991031	1.01047	0.00490429	0.0937666	0.0811636	0.107522		0.0194387	0.0263586
ktx1	361	1.0008	0.991115	1.01048	0.00492309	0.0937227	0.0810281	0.107113		0.0193653	0.0260848
ktx1	362	1.00088	0.99114	1.01068	0.00496578	0.0938337	0.0812343	0.107305		0.0195428	0.0260709
ktx1	363	1.00067	0.99085	1.01037	0.00494868	0.0937247	0.0812518	0.107462		0.0195229	0.0262102
ktx1	364	1.00073	0.991026	1.01046	0.00494606	0.093614	0.0810513	0.107		0.0194363	0.0259485
ktx1	365	1.00081	0.991287	1.01057	0.00489499	0.0935761	0.0808412	0.106833		0.0192784	0.025992
ktx1	366	1.00076	0.990973	1.0104	0.00488164	0.0936307	0.0810494	0.107189		0.0194271	0.0261393
ktx1	367	1.00076	0.991327	1.01044	0.00492039	0.0936283	0.0809041	0.107034		0.0191166	0.0261296
ktx1	368	1.00079	0.991171	1.01033	0.00490149	0.0936753	0.0810467	0.106882		0.0191561	0.0258356
ktx1	369	1.0008	0.99113	1.01032	0.00491722	0.0936194	0.0814303	0.107215		0.0191944	0.0257848
ktx1	370	1.00082	0.991174	1.01055	0.0049278	0.093682	0.0810469	0.107404		0.019379	0.026357
ktx1	371	1.00081	0.990956	1.01039	0.00494395	0.093633	0.0808207	0.106835		0.0194371	0.0260139
ktx1	372	1.00091	0.991284	1.01049	0.00489653	0.0936141	0.0808254	0.106872		0.0192041	0.0260464
ktx1	373	1.00082	0.991392	1.01026	0.004893	0.0936898	0.081328	0.107089		0.0188634	0.0257609
ktx1	374	1.00084	0.991208	1.01043	0.00488318	0.0936108	0.0809163	0.107043		0.019223	0.0261271
ktx1	375	1.00077	0.991123	1.01028	0.00483576	0.0937104	0.081203	0.10706		0.0191597	0.0258565
ktx1	376	1.00077	0.991322	1.01031	0.00482633	0.0936867	0.0813065	0.106814		0.0189922	0.025507
ktx1	377	1.0008	0.991265	1.0102	0.00483801	0.0936315	0.0810825	0.106769		0.0189381	0.0256864
ktx1	378	1.00081	0.991321	1.01033	0.00482796	0.0936408	0.0811438	0.107029		0.0190044	0.025885
ktx1	379	1.00084	0.991383	1.0102	0.00485654	0.0937117	0.0813431	0.107006		0.0188211	0.0256625
ktx1	380	1.00085	0.991544	1.01033	0.00483953	0.0935952	0.0813905	0.106653		0.0187906	0.0252627
ktx1	381	1.00081	0.991396	1.01019	0.00480248	0.0935873	0.0813232	0.106886		0.0187929	0.0255624
ktx1	382	1.00084	0.991412	1.01034	0.00480322	0.0937051	0.0814354	0.107216		0.0189318	0.0257806
ktx1	383	1.0008	0.991442	1.01	0.00478043	0.093749	0.0817427	0.107062		0.0185623	0.0253194
ktx1	384	1.00079	0.991383	1.01018	0.00481414	0.0936447	0.0814444	0.106792		0.0187979	0.0253477
ktx1	385	1.00078	0.991184	1.01013	0.00482901	0.0937075	0.0814768	0.10684		0.0189424	0.0253629
ktx1	386	1.00082	0.991436	1.0101	0.00476901	0.0937006	0.0814701	0.106726		0.0186631	0.025256
ktx1	387	1.00073	0.991211	1.01014	0.00480451	0.0937097	0.0814093	0.10714		0.0189258	0.0257308
ktx1	388	1.00085	0.991455	1.01015	0.00478296	0.093704	0.0814195	0.106687		0.018699	0.0252676
ktx1	389	1.00081	0.991333	1.01016	0.00478916	0.0937871	0.0811902	0.106855		0.018822	0.0256646
ktx1	390	1.00081	0.991526	1.01015	0.0047434	0.0936873	0.0813437	0.106907		0.0186245	0.0255632
ktx1	391	1.00075	0.991159	1.00994	0.00476795	0.0936587	0.0815369	0.106738		0.0187846	0.0252013
ktx1	392	1.00076	0.991423	1.00994	0.00475837	0.0937137	0.0816819	0.106826		0.0185196	0.0251437
ktx1	393	1.00084	0.991401	1.01014	0.0047647	0.0937067	0.08157	0.106448		0.0187367	0.0248784
ktx1	394	1.00083	0.991601	1.0102	0.00471626	0.0936382	0.0815235	0.10624		0.0185961	0.0247167
ktx1	395	1.00095	0.991723	1.01011	0.00472474	0.093672	0.0817578	0.106852		0.0183841	0.025094
ktx1	396	1.00081	0.99159	1.0099	0.00466602	0.0935321	0.0817725	0.106642		0.0183147	0.0248693
ktx1	397	1.00089	0.99185	1.01017	0.00469643	0.0935999	0.0816657	0.106536		0.0183166	0.0248705
ktx1	398	1.00079	0.991417	1.01009	0.00475478	0.0937694	0.0818554	0.106532		0.0186736	0.0246766
ktx1	399	1.00086	0.991742	1.01021	0.00470238	0.0936058	0.08163	0.106527		0.0184665	0.0248974
ktx1	400	1.00079	0.991545	1.01003	0.00470505	0.0937932	0.0815991	0.107102		0.0184842	0.0255032
ktx1	401	1.00082	0.991676	1.00997	0.00467272	0.0935902	0.0817633	0.106558		0.0182973	0.0247942
ktx1	402	1.00076	0.991496	1.01004	0.00473652	0.0936061	0.0817726	0.106247		0.0185455	0.0244742
ktx1	403	1.00082	0.991547	1.00981	0.00468145	0.093717	0.0817854	0.106632		0.018264	0.0248465
ktx1	404	1.00082	0.991708	1.01001	0.00470551	0.0937174	0.0817317	0.106394		0.0182977	0.0246627
ktx1	405	1.00087	0.991614	1.01001	0.00469287	0.0937079	0.0817078	0.106427		0.0183939	0.0247196
ktx1	406	1.00076	0.991813	1.00986	0.00466975	0.0936643	0.0819062	0.106412		0.0180441	0.0245053
ktx1	407	1.00088	0.991546	1.01004	0.00465546	0.0937145	0.0815561	0.106349		0.0184955	0.0247931
ktx1	408	1.00076	0.991506	1.00997	0.00465238	0.0937459	0.081652	0.106394		0.0184628	0.0247425
ktx1	409	1.00082	0.991725	1.00992	0.00459933	0.093663	0.0816836	0.106683		0.0181992	0.024999
ktx1	410	1.00072	0.991595	1.01015	0.00470178	0.0936849	0.0816323	0.106286		0.0185571	0.0246537
ktx1	411	1.00079	0.991494	1.01005	0.00467434	0.0938233	0.0819863	0.106476		0.0185606	0.0244899
ktx1	412	1.00072	0.991679	1.00991	0.00463225	0.0936103	0.0816888	0.106459		0.0182282	0.0247706
ktx1	413	1.00081	0.991697	1.00979	0.00462397	0.0937165	0.0820668	0.106054		0.0180937	0.0239867
ktx1	414	1.00086	0.991677	1.00997	0.00469119	0.0937036	0.0818376	0.10624		0.0182938	0.0244023
ktx1	415	1.00084	0.991861	1.00954	0.00455593	0.0936322	0.0819018	0.106352		0.0176814	0.0244498
ktx1	416	1.00088	0.991823	1.00996	0.00464991	0.0937665	0.0819394	0.106273		0.0181419	0.0243339
ktx1	417	1.00083	0.991869	1.00976	0.004606	0.09368	0.0818399	0.106154		0.0178942	0.0243142
ktx1	418	1.00084	0.991491	1.00995	0.00467208	0.0937425	0.0820639	0.106515		0.0184631	0.0244513
ktx1	419	1.00084	0.991818	1.00972	0.00459426	0.0937008	0.0818836	0.106499		0.0179044	0.0246153
ktx1	420	1.00083	0.991823	1.00984	0.00455903	0.0938199	0.0819064	0.106276		0.0180149	0.0243699
ktx1	421	1.00083	0.991789	1.01	0.00462677	0.0936088	0.0818737	0.106185		0.0182125	0.0243108
ktx1	422	1.0007	0.991577	1.00985	0.00461897	0.0935948	0.0818209	0.106217		0.0182729	0.0243964
ktx1	423	1.00086	0.991953	1.00983	0.00454774	0.0937386	0.0819521	0.106121		0.0178769	0.0241689
ktx1	424	1.00078	0.991784	1.00962	0.00454793	0.0936295	0.0816817	0.106053		0.0178351	0.0243716
ktx1	425	1.00081	0.991785	1.00976	0.00456846	0.0936338	0.0818656	0.106177		0.0179705	0.0243109
ktx2	2	0.99501	0.835	1.1685	0.0775749	0.0549115	0.0015	0.2035		0.3335	0.202
ktx2	3	0.994267	0.861333	1.13267	0.0632024	0.0709392	0.00899383	0.219776		0.271333	0.210782
ktx2	4	0.994532	0.8835	1.1105	0.0546841	0.0793893	0.0158331	0.217491		0.227	0.201658
ktx2	5	0.993656	0.8946	1.09653	0.0492081	0.085797	0.0223219	0.222032		0.201927	0.19971
ktx2	6	0.994355	0.906306	1.08816	0.0447742	0.0891185	0.0270039	0.214657		0.181854	0.187653
ktx2	7	0.995183	0.913143	1.08244	0.0412554	0.0909158	0.0303633	0.204148		0.169294	0.173784
ktx2	8	0.995253	0.917082	1.0771	0.0395666	0.0936975	0.0327727	0.202655		0.160015	0.169883
ktx2	9	0.994083	0.921637	1.07028	0.0370156	0.0953157	0.0365804	0.195431		0.148639	0.15885
ktx2	10	0.99436	0.927407	1.0653	0.0344174	0.0959081	0.0389724	0.191992		0.137893	0.153019
ktx2	11	0.994359	0.931312	1.06018	0.0329352	0.0970184	0.0408842	0.189573		0.128872	0.148689
ktx2	12	0.994521	0.932599	1.05891	0.0317654	0.0985124	0.0430757	0.186468		0.126312	0.143392
ktx2	13	0.994406	0.935322	1.05735	0.0301471	0.0983577	0.0443758	0.181708		0.122033	0.137332
ktx2	14	0.994756	0.938098	1.05342	0.0291626	0.0997385	0.0467134	0.181249		0.11532	0.134535
ktx2	15	0.994563	0.939754	1.05167	0.02833	0.100179	0.0473351	0.178859		0.111913	0.131524
ktx2	16	0.994559	0.942442	1.04924	0.0269577	0.101044	0.0497392	0.176679		0.1068	0.12694
ktx2	17	0.995086	0.94282	1.04853	0.0264162	0.101177	0.0504318	0.174789		0.105706	0.124357
ktx2	18	0.994866	0.942453	1.0464	0.0259404	0.102614	0.0525287	0.173657		0.103952	0.121128
ktx2	19	0.994874	0.94662	1.04596	0.0251513	0.102662	0.0537043	0.171659		0.0993378	0.117955
ktx2	20	0.994836	0.946474	1.04505	0.0248249	0.103602	0.0544485	0.172474		0.0985762	0.118026
ktx2	21	0.994558	0.947222	1.04246	0.0239718	0.103162	0.0551271	0.169891		0.0952399	0.114764
ktx2	22	0.995006	0.94875	1.04256	0.0235582	0.103565	0.0556985	0.168421		0.0938097	0.112722
ktx2	23	0.994663	0.950054	1.04001	0.0227984	0.103735	0.0564168	0.166892		0.0899555	0.110476
ktx2	24	0.994579	0.950325	1.03845	0.0223259	0.103764	0.0577528	0.166088		0.0881233	0.108336
ktx2	25	0.995185	0.952006	1.03941	0.0220005	0.103997	0.0579135	0.165644		0.0874087	0.107731
ktx2	26	0.994459	0.951772	1.03798	0.0216966	0.104071	0.0594088	0.163218		0.0862071	0.103809
ktx2	27	0.994775	0.954269	1.0374	0.0209184	0.104216	0.0599696	0.163337		0.0831351	0.103367
ktx2	28	0.99442	0.953097	1.03568	0.0208541	0.104121	0.0604088	0.160995		0.0825816	0.100586
ktx2	29	0.994531	0.954452	1.03516	0.0203498	0.105007	0.0608932	0.161387		0.080709	0.100494
ktx2	30	0.994786	0.955982	1.03545	0.0201022	0.105005	0.0611368	0.160846		0.0794722	0.0997091
ktx2	31	0.994953	0.957022	1.03351	0.0194288	0.105117	0.0623519	0.15899		0.0764848	0.0966378
ktx2	32	0.994982	0.957524	1.03449	0.0192737	0.104889	0.062611	0.157507		0.076969	0.0948956
ktx2	33	0.994947	0.957076	1.03289	0.0191331	0.105412	0.0623511	0.158509		0.0758151	0.0961576
ktx2	34	0.994586	0.957503	1.03204	0.018846	0.10557	0.0645396	0.15706		0.0745361	0.0925209
ktx2	35	0.994489	0.958787	1.03131	0.0185966	0.105281	0.0639308	0.156902		0.0725215	0.0929711
ktx2	36	0.994671	0.95842	1.03139	0.0185168	0.105732	0.0650779	0.156736		0.0729727	0.0916584
ktx2	37	0.994795	0.959711	1.03014	0.0180174	0.106106	0.0660444	0.15693		0.0704248	0.0908857
ktx2	38	0.99485	0.959442	1.03048	0.0179358	0.105605	0.066501	0.15498		0.0710429	0.0884794
ktx2	39	0.994517	0.960565	1.0287	0.0173716	0.105796	0.0668993	0.153634		0.0681337	0.0867349
ktx2	40	0.994488	0.961044	1.02939	0.0172398	0.106074	0.0671886	0.153125		0.0683498	0.0859363
ktx2	41	0.994899	0.960821	1.02927	0.0171765	0.106277	0.067488	0.15275		0.0684542	0.0852616
ktx2	42	0.994578	0.961888	1.02782	0.0167824	0.106181	0.067811	0.153339		0.065929	0.0855277
ktx2	43	0.995176	0.962342	1.02903	0.0169602	0.106533	0.067846	0.152937		0.0666905	0.0850909
ktx2	44	0.994806	0.963489	1.02765	0.0164226	0.106832	0.0689809	0.152507		0.0641652	0.0835264
ktx2	45	0.99473	0.96325	1.02798	0.0164338	0.10657	0.069363	0.151951		0.0647301	0.0825883
ktx2	46	0.994441	0.963226	1.02678	0.0163088	0.106479	0.0688792	0.151025		0.0635574	0.0821457
ktx2	47	0.994571	0.963102	1.02692	0.0161176	0.106427	0.0697289	0.150281		0.0638149	0.0805522
ktx2	48	0.994826	0.963884	1.02644	0.0158951	0.106743	0.0703418	0.149806		0.0625566	0.0794642
ktx2	49	0.994791	0.963772	1.02595	0.0156288	0.106992	0.0712359	0.150117		0.0621788	0.0788808
ktx2	50	0.994782	0.963283	1.02572	0.0156696	0.107291	0.0707604	0.150715		0.0624366	0.0799547
ktx2	51	0.994628	0.964312	1.02523	0.0155274	0.106838	0.0717422	0.1491		0.0609133	0.0773579
ktx2	52	0.994605	0.965129	1.0254	0.0153124	0.106787	0.071436	0.148752		0.0602688	0.0773164
ktx2	53	0.994541	0.965446	1.02384	0.0151175	0.106853	0.0722182	0.147847		0.0583935	0.0756289
ktx2	54	0.994478	0.965085	1.02397	0.0149093	0.107203	0.0722732	0.148464		0.0588894	0.0761908
ktx2	55	0.994578	0.965761	1.02359	0.0148458	0.107484	0.0725879	0.149157		0.0578311	0.0765692
ktx2	56	0.994636	0.965926	1.02369	0.0146153	0.107558	0.0730469	0.148512		0.0577663	0.0754655
ktx2	57	0.994776	0.966632	1.02334	0.014443	0.107119	0.0730654	0.14786		0.0567089	0.0747947
ktx2	58	0.994721	0.966671	1.0229	0.0143818	0.107202	0.0733374	0.147366		0.0562313	0.0740285
ktx2	59	0.994517	0.96673	1.02286	0.0142378	0.107039	0.0727726	0.146779		0.0561277	0.0740067
ktx2	60	0.994623	0.967186	1.02307	0.01411	0.107585	0.0739682	0.14612		0.0558883	0.0721515
ktx2	61	0.994924	0.967899	1.02313	0.0141306	0.107293	0.0745004	0.146287		0.0552324	0.0717861
ktx2	62	0.994699	0.967554	1.02181	0.0138605	0.107443	0.0749656	0.145971		0.0542559	0.0710053
ktx2	63	0.994531	0.967062	1.02262	0.013939	0.10767	0.074844	0.14664		0.0555577	0.071796
ktx2	64	0.994627	0.968546	1.02206	0.0135856	0.107629	0.0748462	0.145631		0.0535135	0.0707845
ktx2	65	0.994625	0.968034	1.0211	0.013527	0.10738	0.0747766	0.144681		0.0530617	0.0699044
ktx2	66	0.994638	0.967969	1.02112	0.013591	0.107503	0.0758685	0.144409		0.0531485	0.0685409
ktx2	67	0.994764	0.968383	1.02137	0.0134676	0.107657	0.0754309	0.145328		0.0529918	0.0698972
ktx2	68	0.994842	0.969214	1.02163	0.0133104	0.107618	0.0755633	0.145053		0.0524172	0.0694894
ktx2	69	0.994797	0.969224	1.02057	0.0131628	0.107513	0.0759118	0.143153		0.0513448	0.0672412
ktx2	70	0.994668	0.969397	1.0203	0.012874	0.107698	0.0766847	0.143265		0.050904	0.06658
ktx2	71	0.994832	0.969576	1.02076	0.0131079	0.107831	0.0764404	0.143413		0.0511803	0.0669725
ktx2	72	0.994397	0.969254	1.02014	0.0129818	0.107702	0.0773181	0.143159		0.0508835	0.0658412
ktx2	73	0.994486	0.969157	1.02013	0.0129182	0.108031	0.0772229	0.143215		0.050973	0.065992
ktx2	74	0.994536	0.969831	1.01925	0.0127248	0.10789	0.0777489	0.143525		0.0494206	0.065776
ktx2	75	0.994738	0.970155	1.01988	0.0126068	0.107906	0.0774504	0.143255		0.0497249	0.0658044
ktx2	76	0.994537	0.969531	1.01961	0.012723	0.107955	0.0774535	0.14228		0.0500768	0.0648269
ktx2	77	0.994731	0.970071	1.01987	0.01268	0.108176	0.0776022	0.14282		0.0498032	0.065218
ktx2	78	0.9944	0.969874	1.01873	0.0125116	0.107763	0.0774837	0.142469		0.048858	0.0649854
ktx2	79	0.994867	0.971109	1.01935	0.012343	0.108204	0.0780989	0.142196		0.0482456	0.0640968
ktx2	80	0.994684	0.970916	1.01835	0.0121532	0.108081	0.0785	0.141391		0.0474364	0.0628908
ktx2	81	0.99475	0.970576	1.01901	0.012377	0.108343	0.0786902	0.141169		0.0484374	0.0624788
ktx2	82	0.994752	0.971039	1.01849	0.0121551	0.107878	0.0783303	0.141663		0.0474502	0.0633324
ktx2	83	0.994794	0.971294	1.01902	0.0119658	0.108017	0.0784304	0.140869		0.0477249	0.062439
ktx2	84	0.994646	0.971818	1.01873	0.0119808	0.107937	0.0784926	0.141033		0.0469166	0.06254
ktx2	85	0.994572	0.971767	1.01811	0.0119505	0.108198	0.0790529	0.141161		0.0463477	0.0621084
ktx2	86	0.994612	0.971276	1.01824	0.01187	0.108016	0.0787672	0.140765		0.0469623	0.0619981
ktx2	87	0.994736	0.972015	1.01779	0.0117855	0.108247	0.0795158	0.140028		0.0457719	0.0605125
ktx2	88	0.994812	0.971898	1.01783	0.0116657	0.108013	0.0799691	0.139972		0.0459293	0.0600029
ktx2	89	0.99472	0.971858	1.01797	0.0117157	0.108242	0.0795622	0.140894		0.0461161	0.0613317
ktx2	90	0.994653	0.972086	1.01776	0.0116503	0.108403	0.0802311	0.1407		0.045677	0.0604685
ktx2	91	0.99476	0.972152	1.01773	0.011615	0.108083	0.0803789	0.139505		0.0455736	0.0591259
ktx2	92	0.9948	0.972369	1.01737	0.0115154	0.108297	0.0803505	0.139556		0.0449982	0.0592051
ktx2	93	0.99472	0.972845	1.01705	0.0112484	0.108061	0.0803677	0.138584		0.0442046	0.0582159
ktx2	94	0.994767	0.973186	1.01763	0.0113004	0.108306	0.0810322	0.138958		0.0444423	0.057926
ktx2	95	0.994794	0.973313	1.01772	0.0112167	0.108188	0.0809756	0.139133		0.0444111	0.0581578
ktx2	96	0.994812	0.973085	1.01697	0.0111623	0.107997	0.0804146	0.13819		0.0438842	0.0577754
ktx2	97	0.994852	0.973117	1.01674	0.0110955	0.108401	0.0807746	0.139095		0.0436263	0.0583203
ktx2	98	0.99471	0.973434	1.01638	0.0110934	0.108317	0.0806364	0.138566		0.0429479	0.05793
ktx2	99	0.994634	0.973186	1.01724	0.0112073	0.108605	0.0813278	0.138701		0.0440585	0.0573735
ktx2	100	0.994655	0.97303	1.01661	0.0109871	0.10842	0.0820803	0.138369		0.0435798	0.0562884
ktx2	101	0.994595	0.973023	1.01677	0.0111658	0.108146	0.081461	0.138182		0.0437443	0.0567212
ktx2	102	0.994656	0.973411	1.01647	0.0109639	0.108616	0.0821208	0.138568		0.0430583	0.0564468
ktx2	103	0.994574	0.973069	1.01603	0.0109553	0.108115	0.0817128	0.137451		0.0429646	0.0557382
ktx2	104	0.994793	0.973866	1.01621	0.0107975	0.108354	0.0820489	0.138027		0.0423489	0.0559776
ktx2	105	0.9947	0.973746	1.01563	0.010655	0.108513	0.0823686	0.137286		0.0418825	0.0549179
ktx2	106	0.994889	0.973924	1.01582	0.0107134	0.108656	0.0825876	0.137757		0.0418919	0.0551689
ktx2	107	0.994847	0.973876	1.01585	0.0106925	0.108559	0.0824737	0.137849		0.0419702	0.0553756
ktx2	108	0.994761	0.974168	1.01567	0.0105313	0.108739	0.082847	0.136876		0.0415	0.0540293
ktx2	109	0.994663	0.97426	1.01552	0.0105213	0.10841	0.0828133	0.137349		0.0412577	0.0545361
ktx2	110	0.994737	0.97405	1.01542	0.0105157	0.108698	0.0825733	0.13719		0.0413735	0.0546172
ktx2	111	0.99474	0.974417	1.01565	0.0104471	0.1085	0.0829817	0.137281		0.0412317	0.0542996
ktx2	112	0.994933	0.974813	1.01523	0.0103296	0.108728	0.0829432	0.13713		0.0404177	0.0541863
ktx2	113	0.994592	0.974549	1.01469	0.0102602	0.108667	0.0825794	0.136661		0.0401433	0.0540812
ktx2	114	0.994754	0.97453	1.01506	0.0103117	0.10868	0.0832568	0.136619		0.0405297	0.0533624
ktx2	115	0.994604	0.974619	1.0152	0.0102694	0.108521	0.0835197	0.136224		0.0405832	0.0527043
ktx2	116	0.99451	0.974414	1.0151	0.0102703	0.108361	0.0834076	0.135662		0.0406844	0.0522547
ktx2	117	0.994607	0.974798	1.01448	0.0100986	0.108755	0.0840013	0.136246		0.0396845	0.0522447
ktx2	118	0.994788	0.975023	1.01516	0.0101617	0.108913	0.0839139	0.135933		0.0401405	0.0520193
ktx2	119	0.994819	0.975046	1.0147	0.010132	0.108483	0.083815	0.136108		0.039651	0.0522935
ktx2	120	0.994751	0.975173	1.01476	0.00997991	0.108682	0.0841872	0.136163		0.0395871	0.051976
ktx2	121	0.994782	0.974858	1.01486	0.010094	0.108754	0.0836761	0.136176		0.0399976	0.0525002
ktx2	122	0.994619	0.975386	1.01407	0.00983918	0.108845	0.0842197	0.136155		0.0386832	0.0519352
ktx2	123	0.994856	0.975359	1.01453	0.00989628	0.108569	0.0844104	0.135064		0.039166	0.0506535
ktx2	124	0.994538	0.974847	1.01403	0.0098875	0.108586	0.0843267	0.134913		0.0391834	0.0505864
ktx2	125	0.99477	0.975446	1.01413	0.00985635	0.108558	0.0845688	0.135338		0.0386795	0.0507692
ktx2	126	0.994679	0.975532	1.01349	0.00972253	0.108704	0.0851645	0.135423		0.0379623	0.0502587
ktx2	127	0.994814	0.97565	1.01419	0.00978735	0.108776	0.0842472	0.135119		0.038537	0.0508719
ktx2	128	0.994821	0.97563	1.01408	0.00977633	0.108575	0.0848667	0.134428		0.0384452	0.0495617
ktx2	129	0.99478	0.976173	1.01347	0.00963661	0.108811	0.0849022	0.134973		0.0372965	0.0500712
ktx2	130	0.994734	0.975977	1.01378	0.00971462	0.108738	0.085026	0.134825		0.0378019	0.0497993
ktx2	131	0.994893	0.976266	1.01395	0.00950707	0.108707	0.0849226	0.134297		0.0376815	0.0493746
ktx2	132	0.994815	0.976068	1.01343	0.00946588	0.108858	0.0850046	0.135405		0.0373623	0.0504001
ktx2	133	0.994854	0.976518	1.0137	0.00948477	0.108881	0.0851949	0.134642		0.0371861	0.0494467
ktx2	134	0.994655	0.975706	1.01378	0.00962099	0.108774	0.085385	0.134447		0.0380788	0.049062
ktx2	135	0.994877	0.976375	1.01358	0.00938421	0.108724	0.0848354	0.134509		0.03721	0.0496735
ktx2	136	0.994805	0.976754	1.0133	0.00926542	0.108756	0.0856811	0.133919		0.0365459	0.0482375
ktx2	137	0.994676	0.975945	1.01369	0.00953839	0.108997	0.0853094	0.135193		0.037747	0.0498834
ktx2	138	0.994691	0.976341	1.01308	0.00932214	0.108654	0.0853504	0.13423		0.036739	0.0488798
ktx2	139	0.994666	0.976779	1.01272	0.00928	0.108773	0.0851569	0.134021		0.035937	0.0488639
ktx2	140	0.994694	0.976381	1.01339	0.00933434	0.109162	0.0859337	0.134555		0.037006	0.0486214
ktx2	141	0.994623	0.976463	1.01252	0.00923706	0.108642	0.0855442	0.13389		0.036061	0.0483453
ktx2	142	0.994736	0.976606	1.01296	0.00922692	0.109014	0.0862831	0.135234		0.0363516	0.0489513
ktx2	143	0.994741	0.976472	1.01301	0.00931052	0.108812	0.0857582	0.13346		0.0365405	0.0477017
ktx2	144	0.994755	0.976924	1.01349	0.00928248	0.108943	0.0854882	0.13416		0.0365674	0.0486716
ktx2	145	0.994744	0.976949	1.01235	0.0090647	0.108666	0.0860229	0.133914		0.0353987	0.047891
ktx2	146	0.994591	0.976527	1.01286	0.00917835	0.108851	0.086411	0.133667		0.0363356	0.0472563
ktx2	147	0.994617	0.976931	1.01221	0.00902319	0.108942	0.0866246	0.133333		0.0352791	0.0467088
ktx2	148	0.994643	0.976925	1.01278	0.00909979	0.108763	0.0860978	0.133908		0.0358555	0.0478101
ktx2	149	0.994764	0.97731	1.01248	0.00901842	0.108835	0.086126	0.133766		0.0351731	0.0476397
ktx2	150	0.994816	0.977342	1.01221	0.00894193	0.10892	0.0866202	0.133513		0.0348681	0.0468929
ktx2	151	0.994683	0.977429	1.01224	0.00892025	0.10881	0.0863003	0.133055		0.0348136	0.0467551
ktx2	152	0.99484	0.977643	1.01272	0.00891351	0.108988	0.0865058	0.133717		0.035079	0.0472113
ktx2	153	0.99472	0.977348	1.01224	0.00896206	0.108756	0.0864848	0.133207		0.0348881	0.0467226
ktx2	154	0.99469	0.977598	1.01242	0.00892139	0.108909	0.0865789	0.133025		0.0348262	0.0464456
ktx2	155	0.994733	0.977707	1.01216	0.00879985	0.109134	0.0873592	0.132633		0.0344483	0.0452733
ktx2	156	0.994722	0.977038	1.01248	0.00891682	0.108972	0.0867943	0.132979		0.0354413	0.046185
ktx2	157	0.99461	0.977592	1.01189	0.00879553	0.108963	0.086745	0.1326		0.0343014	0.0458552
ktx2	158	0.994829	0.977688	1.01234	0.00880716	0.109015	0.0871277	0.132455		0.0346519	0.0453272
ktx2	159	0.99474	0.977541	1.01177	0.00873562	0.109018	0.0868701	0.132781		0.0342267	0.0459111
ktx2	160	0.994668	0.977412	1.01182	0.00872773	0.109078	0.087182	0.132979		0.0344112	0.0457969
ktx2	161	0.994842	0.977972	1.0123	0.00865462	0.108952	0.0871649	0.132197		0.0343323	0.0450323
ktx2	162	0.994792	0.977891	1.01193	0.00868894	0.109247	0.0873973	0.13288		0.0340385	0.0454829
ktx2	163	0.994782	0.977935	1.01153	0.00864046	0.109108	0.0879434	0.132462		0.033598	0.0445185
ktx2	164	0.994669	0.977904	1.01157	0.0086562	0.108981	0.0873514	0.132142		0.0336678	0.0447902
ktx2	165	0.994828	0.978193	1.01162	0.00859808	0.108904	0.0874017	0.13181		0.0334224	0.0444079
ktx2	166	0.994605	0.978029	1.01126	0.00851813	0.10897	0.0879488	0.132142		0.0332338	0.0441935
ktx2	167	0.994659	0.978393	1.01122	0.0084429	0.109186	0.08765	0.132257		0.0328259	0.0446065
ktx2	168	0.994576	0.978093	1.01114	0.00837572	0.108884	0.0876311	0.131343		0.0330447	0.0437117
ktx2	169	0.994621	0.97811	1.01142	0.00846121	0.108893	0.0873633	0.132025		0.0333097	0.0446616
ktx2	170	0.99474	0.978234	1.01146	0.00843922	0.109011	0.0875187	0.132321		0.0332251	0.0448025
ktx2	171	0.994715	0.978494	1.01101	0.00839639	0.109138	0.0881618	0.13169		0.0325168	0.0435285
ktx2	172	0.994801	0.978625	1.011	0.00831133	0.109112	0.0883339	0.132271		0.0323776	0.0439366
ktx2	173	0.994695	0.978361	1.0113	0.00832062	0.108956	0.0884342	0.132046		0.0329388	0.0436119
ktx2	174	0.994722	0.978245	1.0117	0.00843731	0.108884	0.0880407	0.131078		0.033455	0.0430371
ktx2	175	0.994731	0.978589	1.01144	0.0082824	0.108899	0.088007	0.131301		0.0328514	0.0432937
ktx2	176	0.994783	0.978291	1.01139	0.00840391	0.109015	0.0880765	0.131252		0.0330953	0.0431754
ktx2	177	0.994711	0.978637	1.0109	0.00818989	0.109022	0.0881343	0.131229		0.0322663	0.0430951
ktx2	178	0.994657	0.978353	1.01117	0.00828579	0.109025	0.0882035	0.13137		0.0328203	0.0431663
ktx2	179	0.994709	0.978824	1.01091	0.00825193	0.108938	0.0881834	0.130994		0.0320833	0.0428105
ktx2	180	0.994798	0.978732	1.01126	0.00818413	0.109254	0.0889224	0.131366		0.0325311	0.0424441
ktx2	181	0.994677	0.978876	1.01074	0.00817926	0.109248	0.0888639	0.131602		0.0318661	0.0427383
ktx2	182	0.994728	0.978739	1.0112	0.00820673	0.109148	0.088728	0.131621		0.0324625	0.0428931
ktx2	183	0.994729	0.978531	1.01055	0.00813507	0.109108	0.0886057	0.130921		0.0320149	0.0423155
ktx2	184	0.994758	0.978958	1.01077	0.00810642	0.109049	0.0886582	0.13142		0.0318083	0.0427617
ktx2	185	0.994801	0.978788	1.01065	0.00806984	0.109112	0.088466	0.130646		0.0318576	0.0421804
ktx2	186	0.994668	0.978981	1.01102	0.00806169	0.109154	0.0887367	0.130726		0.0320377	0.0419897
ktx2	187	0.994778	0.978827	1.01082	0.0081658	0.109158	0.0888383	0.131039		0.0319971	0.0422006
ktx2	188	0.994766	0.97916	1.01051	0.0079722	0.109066	0.0891765	0.130938		0.0313454	0.0417617
ktx2	189	0.994721	0.979056	1.01036	0.00801226	0.109057	0.0893106	0.130568		0.0313061	0.041257
ktx2	190	0.994721	0.979021	1.01031	0.00795571	0.109245	0.0892415	0.131304		0.031288	0.0420625
ktx2	191	0.994701	0.97915	1.01095	0.00811066	0.109134	0.0891656	0.130937		0.0317961	0.0417718
ktx2	192	0.994709	0.979234	1.0105	0.00796651	0.109016	0.088852	0.131038		0.0312712	0.0421857
ktx2	193	0.99473	0.979367	1.01019	0.00785723	0.109088	0.0891693	0.130068		0.0308185	0.0408984
ktx2	194	0.994627	0.979358	1.01018	0.00783214	0.109094	0.0893375	0.130228		0.0308212	0.0408907
ktx2	195	0.994736	0.97937	1.01038	0.00794583	0.109115	0.089207	0.130638		0.0310097	0.0414313
ktx2	196	0.994687	0.979327	1.01051	0.00790411	0.109168	0.0892929	0.130592		0.0311855	0.041299
ktx2	197	0.994755	0.979485	1.01051	0.00790958	0.109071	0.0894449	0.130384		0.0310215	0.0409388
ktx2	198	0.994794	0.979682	1.01011	0.00774312	0.109162	0.0893784	0.130375		0.0304242	0.0409966
ktx2	199	0.994763	0.97951	1.01004	0.00778056	0.109239	0.0900202	0.130246		0.0305268	0.0402254
ktx2	200	0.994762	0.979269	1.01034	0.00785176	0.109301	0.0899577	0.13037		0.0310762	0.040412
ktx2	201	0.994627	0.979458	1.00986	0.00778348	0.109022	0.0891518	0.12999		0.0304037	0.0408379
ktx2	202	0.994698	0.979506	1.00994	0.00776363	0.109212	0.0895614	0.130129		0.0304322	0.0405671
ktx2	203	0.994738	0.979657	1.01	0.00778971	0.109068	0.089947	0.129771		0.0303412	0.0398237
ktx2	204	0.994722	0.979732	1.01004	0.00773621	0.108962	0.0897459	0.130125		0.0303054	0.0403792
ktx2	205	0.994666	0.979794	1.00967	0.00760738	0.109227	0.0900254	0.129732		0.0298717	0.0397066
ktx2	206	0.994733	0.979706	1.01004	0.00775416	0.109279	0.0898393	0.129757		0.0303337	0.0399175
ktx2	207	0.994672	0.979935	1.00974	0.00762394	0.109171	0.0899192	0.130064		0.0298044	0.0401446
ktx2	208	0.994615	0.97989	1.00982	0.00757415	0.10922	0.0899656	0.129756		0.0299277	0.03979
ktx2	209	0.994715	0.979882	1.00941	0.00756787	0.109043	0.0896845	0.129581		0.029526	0.0398962
ktx2	210	0.99487	0.980309	1.01005	0.00757366	0.109156	0.0901993	0.129656		0.029736	0.0394562
ktx2	211	0.994694	0.98	1.00985	0.00758017	0.109231	0.0908852	0.129481		0.0298501	0.0385962
ktx2	212	0.994736	0.979915	1.00993	0.00763344	0.109182	0.0898935	0.129742		0.0300157	0.0398482
ktx2	213	0.99466	0.979949	1.00963	0.00754613	0.109125	0.0900299	0.129802		0.0296816	0.0397724
ktx2	214	0.994748	0.980093	1.00969	0.00755601	0.10916	0.0899877	0.129906		0.029596	0.0399181
ktx2	215	0.994899	0.980378	1.00968	0.00755925	0.109308	0.0903241	0.129693		0.0293037	0.0393684
ktx2	216	0.994699	0.980165	1.00953	0.00750947	0.109176	0.0899006	0.129526		0.0293647	0.0396254
ktx2	217	0.994813	0.980168	1.00967	0.00747248	0.109203	0.0904411	0.129835		0.0294974	0.0393937
ktx2	218	0.994672	0.980228	1.00935	0.0073927	0.109119	0.0904245	0.129067		0.029124	0.0386425
ktx2	219	0.994719	0.980003	1.00932	0.00744107	0.109087	0.0902804	0.129081		0.029315	0.0388009
ktx2	220	0.994684	0.98023	1.00935	0.0074127	0.109208	0.0902758	0.129209		0.0291193	0.0389333
ktx2	221	0.994717	0.980256	1.00909	0.00737572	0.10901	0.0899989	0.128742		0.0288304	0.0387432
ktx2	222	0.994697	0.980181	1.00928	0.00747438	0.109069	0.0904591	0.128892		0.0291014	0.0384326
ktx2	223	0.99456	0.980085	1.00914	0.00739095	0.109386	0.0907456	0.129337		0.0290588	0.0385909
ktx2	224	0.994651	0.980416	1.00897	0.00736224	0.109215	0.0906872	0.128825		0.0285567	0.0381382
ktx2	225	0.994773	0.980856	1.00919	0.00728633	0.109165	0.0908945	0.128964		0.0283347	0.0380697
ktx2	226	0.994779	0.980753	1.00888	0.00724179	0.109326	0.090724	0.129052		0.0281304	0.0383279
ktx2	227	0.99479	0.980602	1.00897	0.00728651	0.109251	0.0908254	0.12893		0.0283647	0.038105
ktx2	228	0.99472	0.980476	1.00901	0.00728384	0.109191	0.090895	0.12911		0.0285365	0.0382153
ktx2	229	0.994674	0.980783	1.00883	0.00719901	0.109338	0.0915008	0.129298		0.0280503	0.0377973
ktx2	230	0.994721	0.980777	1.00892	0.00719397	0.109319	0.0911573	0.128793		0.0281422	0.0376361
ktx2	231	0.994631	0.980389	1.00904	0.00726181	0.109539	0.0910766	0.129725		0.0286525	0.0386486
ktx2	232	0.994707	0.980711	1.00902	0.00723864	0.109186	0.0907504	0.128483		0.0283063	0.0377324
ktx2	233	0.994642	0.980522	1.00873	0.00715495	0.109259	0.0910787	0.128916		0.0282079	0.0378375
ktx2	234	0.994662	0.980545	1.00898	0.00721405	0.109282	0.0907128	0.128794		0.0284328	0.0380814
ktx2	235	0.994683	0.980952	1.00879	0.0071212	0.109203	0.0909721	0.128651		0.0278408	0.0376791
ktx2	236	0.994722	0.980751	1.0088	0.00708588	0.109308	0.0914924	0.128462		0.028049	0.0369691
ktx2	237	0.994743	0.980292	1.00888	0.00722851	0.109261	0.0908743	0.128857		0.0285905	0.0379822
ktx2	238	0.994688	0.980878	1.00889	0.00719845	0.109324	0.0914651	0.128262		0.0280091	0.0367965
ktx2	239	0.994674	0.980706	1.00892	0.00715536	0.109224	0.09099	0.128747		0.0282168	0.0377566
ktx2	240	0.994648	0.980728	1.00897	0.00714992	0.109327	0.0914296	0.128671		0.0282457	0.0372416
ktx2	241	0.994726	0.981018	1.00864	0.00703428	0.109504	0.0916072	0.128943		0.0276265	0.037336
ktx2	242	0.994627	0.980909	1.00858	0.00700668	0.109386	0.091391	0.128974		0.0276695	0.037583
ktx2	243	0.994702	0.980899	1.00854	0.00709896	0.109318	0.0915652	0.128295		0.0276449	0.0367299
ktx2	244	0.99481	0.980932	1.00859	0.00704436	0.109188	0.0910017	0.128323		0.0276552	0.0373209
ktx2	245	0.994675	0.980823	1.0084	0.00707936	0.109322	0.0914526	0.127912		0.027577	0.0364594
ktx2	246	0.994653	0.980971	1.00878	0.00710983	0.109335	0.0916089	0.128303		0.0278087	0.0366941
ktx2	247	0.99469	0.980875	1.0085	0.00698928	0.10925	0.0915406	0.128426		0.0276226	0.0368851
ktx2	248	0.994829	0.980866	1.00876	0.00707256	0.109278	0.0915306	0.128283		0.0278891	0.036752
ktx2	249	0.994635	0.981134	1.00842	0.00696448	0.109418	0.0920398	0.127952		0.0272823	0.0359126
ktx2	250	0.994684	0.980782	1.0085	0.00706439	0.1094	0.0919249	0.128194		0.027722	0.0362696
ktx2	251	0.994806	0.981337	1.00834	0.00689176	0.10931	0.0915278	0.128057		0.0269977	0.0365288
ktx2	252	0.994642	0.981313	1.00809	0.006944	0.109273	0.0914745	0.128022		0.0267807	0.0365476
ktx2	253	0.99461	0.981018	1.00836	0.00690533	0.109179	0.0916332	0.127686		0.0273432	0.0360524
ktx2	254	0.994662	0.981058	1.00864	0.0069786	0.109179	0.0914776	0.127906		0.0275816	0.0364286
ktx2	255	0.994747	0.981015	1.00847	0.00691472	0.109385	0.0916618	0.1281		0.0274568	0.0364385
ktx2	256	0.994715	0.981387	1.0084	0.00688317	0.109525	0.092115	0.127984		0.0270166	0.035869
ktx2	257	0.994799	0.981139	1.00846	0.00696397	0.109361	0.0919198	0.127811		0.0273188	0.0358914
ktx2	258	0.994768	0.981593	1.00813	0.00680307	0.109278	0.0916859	0.127692		0.0265336	0.036006
ktx2	259	0.994643	0.98124	1.0078	0.00677684	0.109305	0.0918831	0.127913		0.0265646	0.0360302
ktx2	260	0.994676	0.981484	1.00787	0.00676	0.109238	0.0918285	0.127914		0.0263816	0.0360852
ktx2	261	0.994755	0.981675	1.00826	0.00676468	0.109317	0.0918263	0.128066		0.0265899	0.0362394
ktx2	262	0.994671	0.981408	1.00815	0.0068249	0.109382	0.0919301	0.128141		0.0267381	0.0362105
ktx2	263	0.994736	0.981557	1.008	0.00675722	0.109386	0.0920178	0.127825		0.026442	0.0358076
ktx2	264	0.994707	0.981554	1.00764	0.00667801	0.109383	0.0921456	0.127706		0.0260851	0.0355603
ktx2	265	0.994649	0.981393	1.00771	0.00669588	0.10927	0.0922034	0.127447		0.0263186	0.0352432
ktx2	266	0.994723	0.981484	1.008	0.00676383	0.109242	0.0918559	0.12758		0.0265117	0.0357246
ktx2	267	0.994649	0.981626	1.00792	0.0066626	0.109417	0.0923188	0.127773		0.0262893	0.035454
ktx2	268	0.994782	0.981683	1.00801	0.00673895	0.109353	0.0921079	0.127869		0.0263294	0.0357608
ktx2	269	0.994697	0.981645	1.00771	0.00667615	0.109376	0.0924036	0.127443		0.0260639	0.0350395
ktx2	270	0.994825	0.982024	1.00811	0.00666339	0.109503	0.0920051	0.128203		0.0260897	0.0361978
ktx2	271	0.994769	0.981661	1.00795	0.00666891	0.109552	0.0920637	0.127843		0.0262839	0.0357796
ktx2	272	0.994517	0.981387	1.00749	0.00666713	0.109236	0.0923548	0.127314		0.0261022	0.034959
ktx2	273	0.994736	0.981721	1.00791	0.0066626	0.109346	0.0920536	0.127071		0.0261857	0.0350174
ktx2	274	0.994601	0.981609	1.00762	0.00665324	0.109458	0.0924297	0.12746		0.0260104	0.0350307
ktx2	275	0.994775	0.981788	1.00777	0.00660737	0.109491	0.0931522	0.127316		0.0259812	0.0341634
ktx2	276	0.994691	0.981873	1.00773	0.00660306	0.109456	0.0926422	0.12768		0.0258552	0.0350376
ktx2	277	0.994688	0.981683	1.00789	0.00669915	0.109475	0.0928188	0.127367		0.0262114	0.0345484
ktx2	278	0.994707	0.982013	1.00788	0.00656302	0.109384	0.0925658	0.12751		0.0258664	0.0349442
ktx2	279	0.994745	0.982166	1.00751	0.00648021	0.109382	0.0925136	0.126713		0.025347	0.0341998
ktx2	280	0.994782	0.982071	1.00798	0.00659741	0.109354	0.0923342	0.127282		0.025914	0.034948
ktx2	281	0.99466	0.981812	1.00786	0.00657921	0.109438	0.0926506	0.127013		0.0260506	0.0343621
ktx2	282	0.994776	0.981894	1.00752	0.00658163	0.109423	0.0928387	0.127181		0.0256254	0.0343424
ktx2	283	0.994621	0.981853	1.00742	0.00657903	0.109339	0.0927711	0.126694		0.0255646	0.0339231
ktx2	284	0.994735	0.982051	1.00736	0.00642231	0.10925	0.0930872	0.126975		0.0253074	0.0338874
ktx2	285	0.994787	0.982157	1.00751	0.0064865	0.109396	0.0926776	0.126993		0.0253504	0.0343157
ktx2	286	0.994676	0.982197	1.00761	0.00646526	0.109332	0.0927077	0.126895		0.0254177	0.034187
ktx2	287	0.994668	0.982044	1.00713	0.00641585	0.109637	0.0931602	0.127111		0.0250863	0.0339507
ktx2	288	0.994582	0.981922	1.00736	0.00646357	0.109364	0.0930955	0.126569		0.0254356	0.0334737
ktx2	289	0.994787	0.982134	1.00785	0.00644131	0.109416	0.0924535	0.126894		0.0257128	0.034441
ktx2	290	0.99475	0.982431	1.0074	0.00639861	0.109335	0.092861	0.126547		0.0249685	0.0336856
ktx2	291	0.994777	0.981881	1.00748	0.00648527	0.109438	0.093029	0.126937		0.025602	0.0339077
ktx2	292	0.994691	0.982154	1.0074	0.00641104	0.109499	0.0931149	0.126851		0.0252471	0.0337361
ktx2	293	0.994765	0.982371	1.00746	0.00645389	0.109467	0.0929635	0.126982		0.0250924	0.0340182
ktx2	294	0.994789	0.982259	1.00755	0.00648565	0.109448	0.0933652	0.126699		0.0252865	0.0333342
ktx2	295	0.994688	0.981982	1.00753	0.00650916	0.109469	0.0930832	0.126778		0.0255445	0.0336948
ktx2	296	0.994793	0.982236	1.00733	0.00647475	0.109507	0.0929465	0.126686		0.0250932	0.0337396
ktx2	297	0.994698	0.982191	1.00742	0.00642496	0.109497	0.0933432	0.12676		0.0252311	0.0334165
ktx2	298	0.994723	0.98225	1.00701	0.00629467	0.109414	0.0927243	0.126644		0.0247566	0.0339193
ktx2	299	0.994711	0.982101	1.00711	0.00638826	0.109639	0.0935422	0.126651		0.0250078	0.0331086
ktx2	300	0.994656	0.982254	1.00736	0.00637806	0.109475	0.0935741	0.12665		0.0251075	0.0330762
ktx2	301	0.994686	0.982199	1.00672	0.00627667	0.109207	0.0928103	0.126115		0.0245203	0.0333047
ktx2	302	0.994684	0.982353	1.00714	0.00636262	0.109399	0.0933051	0.126374		0.0247903	0.0330686
ktx2	303	0.994824	0.982636	1.00708	0.00629879	0.10945	0.0932841	0.12607		0.0244407	0.0327855
ktx2	304	0.994667	0.982175	1.00713	0.00633325	0.109359	0.0930983	0.125895		0.0249561	0.0327971
[truncated: 121 more rows]
